# Supplementary material for: Teleophthalmology-enabled and artificial intelligence-ready referral pathway for community optometry referrals of retinal disease (HERMES): a Cluster Randomised Superiority Trial with a linked Diagnostic Accuracy Study—HERMES study report 1—study protocol
Source: PubMed Central journal article supplement (PMC8808461; doi:10.1136/bmjopen-2021-055845), 2022-02-01
Supplement: bmjopen-2021-055845.draft_revisions.pdf [file bmjopen-2021-055845.draft_revisions.pdf]

# BMJ Open

BMJ Open is committed to open peer review. As part of this commitment we make the peer review history of every article we publish publicly available.

When an article is published we post the peer reviewers' comments and the authors' responses online. We also post the versions of the paper that were used during peer review. These are the versions that the peer review comments apply to.

The versions of the paper that follow are the versions that were submitted during the peer review process. They are not the versions of record or the final published versions. They should not be cited or distributed as the published version of this manuscript.

BMJ Open is an open access journal and the full, final, typeset and author-corrected version of record of the manuscript is available on our site with no access controls, subscription charges or pay-per-view fees (<http://bmjopen.bmj.com>).

If you have any questions on BMJ Open's open peer review process please email [info.bmjopen@bmj.com](mailto:info.bmjopen@bmj.com)

# BMJ Open

## Tele-opHthalmology-enabled and ARTificial Intelligence-ready referral pathway for coMmunity optomEtry referrals of retinal disease (HERMES): A Cluster Randomised Superiority Trial with a linked Diagnostic Accuracy Study Protocol

|                               |                                                                                                                                                                                                                                                                                                                                                                                                                                                                                                                                                                                                                                                                                                                                                                                                                                                                                                                                                                                                                                                                                                                                                                                                                                                                                                                                                                                                                                                                                                                                                                                                                                                                                                            |
|-------------------------------|------------------------------------------------------------------------------------------------------------------------------------------------------------------------------------------------------------------------------------------------------------------------------------------------------------------------------------------------------------------------------------------------------------------------------------------------------------------------------------------------------------------------------------------------------------------------------------------------------------------------------------------------------------------------------------------------------------------------------------------------------------------------------------------------------------------------------------------------------------------------------------------------------------------------------------------------------------------------------------------------------------------------------------------------------------------------------------------------------------------------------------------------------------------------------------------------------------------------------------------------------------------------------------------------------------------------------------------------------------------------------------------------------------------------------------------------------------------------------------------------------------------------------------------------------------------------------------------------------------------------------------------------------------------------------------------------------------|
| Journal:                      | <i>BMJ Open</i>                                                                                                                                                                                                                                                                                                                                                                                                                                                                                                                                                                                                                                                                                                                                                                                                                                                                                                                                                                                                                                                                                                                                                                                                                                                                                                                                                                                                                                                                                                                                                                                                                                                                                            |
| Manuscript ID                 | bmjopen-2021-055845                                                                                                                                                                                                                                                                                                                                                                                                                                                                                                                                                                                                                                                                                                                                                                                                                                                                                                                                                                                                                                                                                                                                                                                                                                                                                                                                                                                                                                                                                                                                                                                                                                                                                        |
| Article Type:                 | Protocol                                                                                                                                                                                                                                                                                                                                                                                                                                                                                                                                                                                                                                                                                                                                                                                                                                                                                                                                                                                                                                                                                                                                                                                                                                                                                                                                                                                                                                                                                                                                                                                                                                                                                                   |
| Date Submitted by the Author: | 28-Jul-2021                                                                                                                                                                                                                                                                                                                                                                                                                                                                                                                                                                                                                                                                                                                                                                                                                                                                                                                                                                                                                                                                                                                                                                                                                                                                                                                                                                                                                                                                                                                                                                                                                                                                                                |
| Complete List of Authors:     | <p>Han, Ji Eun; University of Birmingham Institute of Inflammation and Ageing,<br/> Liu, Xiaoxuan; University Hospitals Birmingham NHS Foundation Trust, Bunce, Catey; Royal Marsden Hospital NHS Trust, RM CTU<br/> Douiri, Abdel; King's College London, Primary Care And Public Health Sciences<br/> Vale, Luke; Newcastle University, Health Economics Group, Institute of Health and Society<br/> Blandford, Ann; University College London, UCLIC<br/> Lawrenson, John; City University London, Division of Optometry and Visual Science<br/> Hussain, Rima; Moorfields Eye Hospital NHS Foundation Trust, NIHR Biomedical Research Centre; UCL, Institute of Ophthalmology<br/> Grimaldi, Gabriela; Moorfields Eye Hospital NHS Foundation Trust, NIHR Biomedical Research Centre; UCL, Institute of Ophthalmology<br/> Learoyd, Anastazia; King's College London, School of Population Health &amp; Environmental Sciences<br/> Kernohan, Ashleigh; Newcastle University, Population Health Sciences Institute<br/> Dinah, Christiana; London North West Healthcare NHS Trust, Ophthalmology<br/> Minos, Evangelos; North West Anglia NHS Foundation Trust<br/> Sim, Dawn; Moorfields Eye Hospital NHS Foundation Trust,<br/> Aslam, Tariq; University of Manchester,<br/> Patel, Praveen; Moorfields Eye Hospital NHS Foundation Trust, NIHR Biomedical Research Centre; UCL, Institute of Ophthalmology<br/> Denniston, Alastair; University Hospitals Birmingham NHS Foundation Trust<br/> Keane, Pearse; Moorfields Eye Hospital NHS Foundation Trust<br/> Balaskas, Konstantinos; Moorfields Eye Hospital NHS Foundation Trust, ; University of Manchester, School of Biological Sciences</p> |
| Keywords:                     | OPHTHALMOLOGY, Medical retina < OPHTHALMOLOGY, HEALTH SERVICES ADMINISTRATION & MANAGEMENT, HEALTH ECONOMICS, Telemedicine < BIOTECHNOLOGY & BIOINFORMATICS                                                                                                                                                                                                                                                                                                                                                                                                                                                                                                                                                                                                                                                                                                                                                                                                                                                                                                                                                                                                                                                                                                                                                                                                                                                                                                                                                                                                                                                                                                                                                |
|                               |                                                                                                                                                                                                                                                                                                                                                                                                                                                                                                                                                                                                                                                                                                                                                                                                                                                                                                                                                                                                                                                                                                                                                                                                                                                                                                                                                                                                                                                                                                                                                                                                                                                                                                            |

1  
2  
3  
4  
5  
6  
7  
8  
9  
10  
11  
12  
13  
14  
15  
16  
17  
18  
19  
20  
21  
22  
23  
24  
25  
26  
27  
28  
29  
30  
31  
32  
33  
34  
35  
36  
37  
38  
39  
40  
41  
42  
43  
44  
45  
46  
47  
48  
49  
50  
51  
52  
53  
54  
55  
56  
57  
58  
59  
60

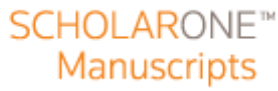

# 1 2 3 4 **Tele-opHthalmology-enabled and ARTificial Intelligence-ready** 5 **referral pathway for coMmunity optomEtry referrals of retinal** 6 **disease (HERMES): A Cluster Randomised Superiority Trial with a** 7 **linked Diagnostic Accuracy Study Protocol** 8 9 10 11 12 13 14

## 15 **Authors**

16 Ji Eun Diana Han, Xiaoxuan Liu, Catey Bunce, Abdel Douiri, Luke Vale, Ann Blandford, John G  
17 Lawrenson, Rima Hussain, Gabriela Grimaldi, Annastazia Learoyd, Ashleigh Kernohan, Christiana  
18 Dinah, Evangelos Minos, Dawn Sim, Tariq Aslam, Praveen J. Patel, Alastair K Denniston, Pearse A  
19 Keane, Konstantinos Balaskas  
20  
21

## 22 **Affiliations**

23 NIHR Biomedical Research Centre at Moorfields Eye Hospital NHS Foundation Trust and UCL  
24 Institute of Ophthalmology, London. (Pearse Keane, Praveen J. Patel, Dawn Sim, Rima Hussain,  
25 Gabriela Grimaldi)

26 University College London (Pearse Keane, Prof Ann Blandford, Gabriela Grimaldi)

27 King's College London (Drs Abdel Douiri, Annastazia Learoyd)

28 City, University of London (Prof John Lawrenson)

29 University of Newcastle (Prof Luke Vale, Ashleigh Kernohan)

30 Manchester University NHS Foundation Trust (Prof Tariq Aslam)

31 University Hospitals Birmingham (Prof Alastair Denniston, Ji Eun Diana Han, Xiaoxuan Liu)

32 Central Middlesex Hospital (Christiana Dinah)

33 North West Anglia NHS Foundation Trust (Evangelos Minos)

34 Royal Marsden NHS Foundation Trust (Dr Catey Bunce)  
35  
36  
37

## 38 **Corresponding Author:**

39 Konstantinos Balaskas

40 Moorfields Eye Hospital NHS Foundation Trust

41 162 City Road

42 London

43 EC1V 2PD

44 [k.balaskas@nhs.net](mailto:k.balaskas@nhs.net)  
45  
46  
47

48 **Keywords:** Telemedicine, tele-ophthalmology, artificial intelligence, machine learning, ophthalmology,  
49 retinal disease, randomised controlled trial, diagnostic accuracy  
50  
51  
52  
53  
54  
55  
56  
57  
58  
59  
60

## ABSTRACT

### *Introduction*

Recent years have witnessed an upsurge of demand in eye care services in the UK. With a large proportion of patients referred to Hospital Eye Services (HES) for diagnostics and disease management, the referral process results in unnecessary referrals from erroneous diagnoses, and delays in access to appropriate treatment. A potential solution is a tele-ophthalmology digital referral pathway linking community optometry and HES.

### *Methods and analysis*

The HERMES study is a cluster randomised clinical trial (C-RCT) for evaluating the effectiveness of a tele-ophthalmology referral pathway between community optometry and HES for retinal diseases. Nested within HERMES is a diagnostic accuracy study, which assesses the accuracy of an artificial intelligence (AI) decision support system (DSS) for automated diagnosis and referral recommendation. A post-implementation, observational sub-study, a within-trial economic evaluation and discrete choice experiment will assess the feasibility of implementation of both digital technologies within a real-life setting. Patients with a suspicion of retinal disease, undergoing eye examination and optical coherence tomography (OCT) scans, will be recruited across 24 optometry practices in the UK. Optometry practices will be randomised to standard care or tele-ophthalmology. The primary outcome is the proportion of false positive referrals (unnecessary HES visits) in the current referral pathway compared to the tele-ophthalmology referral pathway. OCT scans will be interpreted by the AI DSS which provides a diagnosis and referral decision and the primary outcome for the AI diagnostic study is diagnostic accuracy of the referral decision made by the Moorfields-DeepMind AI system. Secondary outcomes relate to inappropriate referral rate, cost-effectiveness analyses and human-computer interaction analyses.

### *Ethics and dissemination*

Ethical approval was obtained from the London - Bromley Research Ethics Committee (REC 20/LO/1299). Findings will be reported through academic journals in ophthalmology, health services research and HCI.

Trial registration number: ISRCTN18106677

## STRENGTHS AND LIMITATIONS OF THIS STUDY

- The HERMES study aims to generate multi-centre evidence to evaluate the effectiveness and cost effectiveness of a tele-ophthalmology referral system, providing the potential to streamline the referral pathway between community optometry and HES for patients with retinal disease.
- Our study design involves five major eye hospitals and clusters of community optometrists. Such a shared care system has the potential to relieve overloaded outpatient activity and, by extension, allow HES to reallocate resources towards “more-specialist” ophthalmic care.
- A key strength of HERMES is its potential to provide evidence-based implementation strategies that will be necessary for the adoption of Artificial Intelligence Decision Support System by incorporating the community-based interventional study.
- Our study will involve a comprehensive economic evaluation, coupled with a Human-Computer Interaction analysis, which allows exploration of the opportunities and barriers for the adoption of the proposed digital technologies in real-world practice settings.
- This pathway is designed for the UK health setting and may not be immediately generalisable for world-wide health systems. However, interventions such as this are timely and relevant to the global trend towards modernisation of health care delivery.

## BACKGROUND

Ophthalmology outpatient attendances account for 10% of all outpatient activity in the United Kingdom (UK), more than any other individual medical specialty.[1, 2] Modern ophthalmic practice in the UK is faced by the challenges of an ageing population, increasing prevalence of degenerative disease, and emergent treatments that are revolutionary but dependent on timely diagnosis. This represents a huge strain on diagnostic services and adversely impacts on timely access to care. Concurrently, there have been exponential increases in computing power and artificial intelligence, expansions in the strength and ubiquity of communications technologies, and developments in imaging capabilities, including in the community optometry setting.[3]

In the UK, primary care for ophthalmology is delivered by community-based optometry practices (High Street opticians). A large proportion of patients diagnosed with a suspicion of retinal disease, including common conditions such as neovascular ('wet') age-related macular degeneration are referred to Hospital Eye Services (HES) for diagnostics and disease management.[4, 5] The referral process results in unnecessary referrals (which can cause inconvenience and distress for patients), erroneous diagnoses, misclassification in terms of urgency, duplication of imaging tests and delays in access to treatment.

An increase of 30% in eye clinic attendances has been observed within the last 5 years throughout the UK.[6] Further increases are likely because of the increasing availability of imaging technology, and especially Optical Coherence Tomography (OCT), which is becoming ubiquitous in community optometry practices.[7] OCT is a non-invasive imaging modality that uses light to generate micrometre-resolution three-dimensional images of the retina and provides the best way to diagnose a number of common retinal pathologies including wet AMD.

This study focuses on two potentially complementary digital technologies that have the potential to revolutionise the interface between community optometrists and hospital-based eye clinics: the tele-ophthalmology platform and the Moorfields-DeepMind Artificial Intelligence Decision Support System (DSS). The technologies will be assessed through two complementary and linked quantitative studies:

1. Cluster Superiority Randomised Trial (RCT) of tele-ophthalmology
2. Prospective diagnostic accuracy study of Artificial Intelligence (Machine Learning) Diagnosis Support (the Moorfields-DeepMind algorithm)

### **1. Cluster Superiority Randomised Trial (RCT) of Tele-ophthalmology Pathway**

Tele-medicine in Ophthalmology can help face this challenge of provision of optimal and expert care to people attending for routine eye tests in community optometry practices, through a digital referral pathway relying on a tele-ophthalmology link between community optometry and HES. This could optimise the referral process by allowing remote review of imaging and clinical data captured at the community level, by human experts based in HES. We will perform a cluster randomised superiority trial to assess the impact on service delivery metrics (such as proportion of unnecessary referrals and time from referral to treatment for urgent maculopathies) of a digital link between community

1  
2  
3 optometry practices and HES using a tele-ophthalmology platform. We will use a device-agnostic,  
4 tele-ophthalmology platform to enable a digital referral pathway of patients with a suspicion of retinal  
5 disease. The pilot data produced by our research team has demonstrated the potential of tele-  
6 ophthalmology to drastically improve the efficiency of the referral pathway between community  
7 optometry and HES while reducing unnecessary referrals to HES[8] and hence we propose a  
8 randomised trial powered to demonstrate superiority of the digital referral pathway against standard  
9 care.  
10  
11  
12

## 13 **2. Diagnostic Accuracy Study of Artificial Intelligence Diagnosis Support System**

14 Artificial Intelligence Decision Support Systems (AI DSS) have recently been developed and shown to  
15 have good diagnostic accuracy against human experts in interpreting ocular imaging tests, such as  
16 OCT scan.[9] The collaboration between Moorfields Eye Hospital and Google DeepMind produced the  
17 arguably most advanced Deep Learning decision support system in Ophthalmology, capable of  
18 interpreting OCT scans, providing diagnosis for retinal disease and suggesting urgency of referral. In  
19 silico analysis using retrospectively collected data has validated the tool against human experts for  
20 the diagnosis of retinal disease and referral recommendations and it has been shown to be non-  
21 inferior.[9] The algorithm is uniquely and independently used in Moorfields Eye Hospital for research  
22 purposes. Thus, while such work has demonstrated promising results, a prospective study is required  
23 to demonstrate its value in practice.  
24  
25  
26  
27  
28  
29

30 We will perform a prospective study to assess diagnostic (referral) accuracy of the Moorfields-  
31 DeepMind AI DSS when applied on the OCT scans collected in the context of the tele-ophthalmology  
32 RCT. This will allow maximum utilisation of collected data from the trial and will provide estimates and  
33 confidence intervals of diagnostic (referral) accuracy. All cases included in the RCT will be reviewed  
34 by the Moorfields-DeepMind AI DSS within 48 hours of obtaining the OCT scans and a referral  
35 decision (refer routinely, refer urgently, don't refer) will be made by the algorithm for each case and  
36 recorded. The referral decisions made by the AI DSS will not be implemented in practice, yet data of  
37 the time required to obtain these decisions and any technical issues encountered with its use will be  
38 captured. These data will be incorporated into the implementation science models, including Human-  
39 Computer Interaction analysis, value-based economic evaluation, and discrete choice experiment, to  
40 identify the potential opportunities and gaps in advancing the adoption of the Moorfields-DeepMind AI  
41 DSS.  
42  
43  
44  
45  
46  
47

## 48 **3. Impact of the Covid-19 pandemic: Post-implementation Observational Pragmatic Sub-Study**

49 NHS services underwent rapid and significant adjustments across the board in response to extreme  
50 challenges presented by the Covid-19 pandemic. Changes to healthcare services driven by necessity  
51 are not always underpinned by a robust evidence base for efficiency and safety. In Ophthalmology, as  
52 a response to the need for social distancing and minimising unnecessary hospital visits, tele-  
53 ophthalmology pathways were commissioned recently in some areas of England using digital link to  
54 facilitate referrals between community optometry and Hospital Eye Services. Greater Manchester was  
55 an early adopter of this approach and a majority of the optometry practices in that area are now  
56 referring to NHS eye units via a tele-ophthalmology link. This local change in standard care provides a  
57  
58  
59  
60



1  
2  
3 unique opportunity to examine whether tele-ophthalmology works under usual conditions within the  
4 NHS. This sub-study will allow us to record and measure variation in quality of health care within a  
5 local region to inform our inferences from the RCT on how the tele-ophthalmology pathway will  
6 perform within a real-life setting. We will thus perform a pragmatic, observational, post-implementation  
7 study involving community optometry practices in the Greater Manchester area. This will also serve  
8 as a safety analysis allowing us to identify potential safety signals of the tele-ophthalmology pathways  
9 and adding granularity to the economic and qualitative evaluations of the RCT.  
10  
11  
12  
13  
14

### 15 *Trial aims and objectives*

16 There are two complementary aims (aims 1&2) pertaining to the linked quantitative studies assessing  
17 the two digital technologies ('tele-ophthalmology' and the 'Moorfields-DeepMind' AI). The qualitative  
18 research element (aim 3) using Human-Computer Interaction (HCI) methodology will run across both  
19 studies to provide evidence on implementation (**Box 1**).  
20  
21  
22  
23  
24  
25  
26  
27  
28  
29  
30  
31  
32  
33  
34  
35  
36  
37  
38  
39  
40  
41  
42  
43  
44  
45  
46  
47  
48  
49  
50  
51  
52  
53  
54  
55  
56  
57  
58  
59  
60

**Box 1. Aims and objectives of the HERMES study**

| Aims                                                                                                                                                                                                                                                        | Objectives                                                                                                                                                                                                                                                                                                                                                                                                                                                                                                                                                                                                                                                                                                                                                                                                                                                                                                                                                                                                                                                                                                                                                                                                                                                                                                              |
|-------------------------------------------------------------------------------------------------------------------------------------------------------------------------------------------------------------------------------------------------------------|-------------------------------------------------------------------------------------------------------------------------------------------------------------------------------------------------------------------------------------------------------------------------------------------------------------------------------------------------------------------------------------------------------------------------------------------------------------------------------------------------------------------------------------------------------------------------------------------------------------------------------------------------------------------------------------------------------------------------------------------------------------------------------------------------------------------------------------------------------------------------------------------------------------------------------------------------------------------------------------------------------------------------------------------------------------------------------------------------------------------------------------------------------------------------------------------------------------------------------------------------------------------------------------------------------------------------|
| <p>1. To assess the effectiveness and efficiency of a digital referral pathway between community optometry and Hospital Eye Services for referral of retinal disease enabled by a device-agnostic, tele-ophthalmology platform (superiority C-RCT).</p>     | <ol style="list-style-type: none"> <li>1. Primary Objective: To compare the proportion of referrals classified as unnecessary (cases that can be safely managed without a HES consultation) between current standard care and tele-ophthalmology digital referral pathway.</li> <li>2. Secondary Objectives: <ul style="list-style-type: none"> <li>• To estimate the relative efficiency of the tele-ophthalmology digital pathway compared with standard care in both within trial-based evaluation.</li> <li>• To compare the rate of inappropriate referrals (defined as wrong diagnosis or wrong level of urgency) between standard care and the tele-ophthalmology digital pathway.</li> <li>• To capture the number of uncommon/complex retinal referrals to secondary care and the proportion that can be safely triaged through the tele-ophthalmology platform.</li> <li>• To compare time from referral to review and/or treatment in HES for urgent referrals (such as Wet AMD and Retinal Vein Occlusions) between standard care and tele-ophthalmology digital pathway.</li> <li>• To assess the number of false negatives (number of patients that would have benefited from a HES consultation but were deemed suitable for continued care in the community) (Safety assessment)</li> </ul> </li> </ol> |
| <p>2. To estimate the diagnostic (referral) accuracy and assess the 'real-life' performance of an Artificial Intelligence Decision Support System (the Moorfields-DeepMind AI) in the context of referral pathways between community optometry and HES.</p> | <ol style="list-style-type: none"> <li>1. To estimate the diagnostic (referral) accuracy of the Moorfields-DeepMind AI for recommending referral to HES from community optometry practices.</li> <li>2. To estimate the diagnostic accuracy of the Moorfields-DeepMind AI for the diagnosis of retinal disease.</li> <li>3. To assess the cost-effectiveness of the introduction of the DeepMind algorithm in the referral pathway between community optometry and HES.</li> <li>4. To assess the technical feasibility of utilising the Moorfields-DeepMind AI for real-time analysis of retinal OCT scan images.</li> <li>5. To assess real-time operational performance of the Moorfields-DeepMind AI in the tele-ophthalmology referral pathway.</li> </ol>                                                                                                                                                                                                                                                                                                                                                                                                                                                                                                                                                         |
| <p>3. To assess patient and healthcare professional acceptability as well as the barriers and enablers for the adoption of these digital technologies in the context of referral pathways between community optometry and HES through a Human-</p>          | <ol style="list-style-type: none"> <li>1. To understand current workflows and practices of staff and patients in community optometry and HES so as to identify key user requirements for tele-ophthalmology tools from the perspectives of both practitioners and patients (working with care settings with diverse established practices).</li> <li>2. To oversee the deployment of a digital referral platform at selected participating sites to ensure acceptability and acceptance by all user groups, and to understand the adoption process.</li> <li>3. To identify factors that shape professionals' and patients' attitudes to, and trust in, the Moorfields-DeepMind AI, and how</li> </ol>                                                                                                                                                                                                                                                                                                                                                                                                                                                                                                                                                                                                                  |

|                                                                                                                                                                                                                                                                                                                |                                                                                                                                                                                                                                                                                                                                                                                                                                                                                                                                                                                                                                                                                                                                                                                                                                                                                                                                                                                                                        |
|----------------------------------------------------------------------------------------------------------------------------------------------------------------------------------------------------------------------------------------------------------------------------------------------------------------|------------------------------------------------------------------------------------------------------------------------------------------------------------------------------------------------------------------------------------------------------------------------------------------------------------------------------------------------------------------------------------------------------------------------------------------------------------------------------------------------------------------------------------------------------------------------------------------------------------------------------------------------------------------------------------------------------------------------------------------------------------------------------------------------------------------------------------------------------------------------------------------------------------------------------------------------------------------------------------------------------------------------|
| <p>Computer Interaction approach.</p>                                                                                                                                                                                                                                                                          | <p>to present information in ways that instil appropriate confidence.</p> <p>4. To observe workflows and practices of staff and patients in community optometry practices and HES with already established tele-ophthalmology pathways, aiding identification of technical, logistical and human factors affecting implementation of tele-ophthalmology in real-life (pragmatic sub-study).</p>                                                                                                                                                                                                                                                                                                                                                                                                                                                                                                                                                                                                                        |
| <p>4. To estimate the effectiveness and efficiency of a digital referral pathway between community optometry (High Street Opticians) and the Hospital Eyes Services for referral of retinal diseases enabled by a tele-ophthalmology platform in a real-life, observational post-implementation sub-study.</p> | <p>1. To compare the proportion of referrals classified as unnecessary (cases that can be safely managed without a HES consultation) against Reference Standard and the intervention arm of the RCT.</p> <p>2. To compare the rate of inappropriate referrals (defined as wrong diagnosis or wrong level of urgency) against the Reference Standard and the intervention arm of the RCT.</p> <p>3. To assess the number of false negatives (number of patients that would have benefitted from a HES consultation but were deemed suitable to continued care in the community) (Safety assessment).</p> <p>4. To compare time from referral to review and/or treatment in HES for urgent referrals (such as Wet AMD and Retinal Vein Occlusions) between post-implementation real-life tele-ophthalmology digital pathway and the intervention arm of the RCT.</p> <p>5. To estimate the relative efficiency of the real-life tele-ophthalmology digital pathway compared with the RCT tele-ophthalmology pathway.</p> |

## STUDY DESIGN AND PATIENT POPULATION

### *Study Design*

#### **Superiority C-RCT of Tele-Ophthalmology Pathway**

An interventional superiority cluster randomised trial (RCT) will be performed comparing standard practice for referral of suspicious retinal disease with tele-ophthalmology between community optometry and HES. This part of the study will be reported according to the CONSORT extension for C-RCTs.[10]

#### **Diagnostic Accuracy Study of Artificial Intelligence Diagnosis Support System**

A prospective study will be conducted using the data of the above RCT to assess the diagnostic (referral) accuracy of an advanced AI DSS (the Moorfields-DeepMind Algorithm) for the automated diagnosis and referral recommendation for retinal disease. OCT scans transferred to the Moorfields Reading Centre in the course of the study will be assessed by the DeepMind algorithm in 'real-time' and its referral recommendations will be recorded and analysed for diagnostic (referral) accuracy and compared against the performance of human experts in the standard care and tele-ophthalmology arms of the RCT. This part of the study will be reported according to the STARD 2015 statement,[11] or STARD-AI.[12] A within-trial based economic evaluation will estimate the efficiency of alternative referral models for retinal disease. A Human-Computer Interaction (HCI) analysis using qualitative methods will assess feasibility of implementation of both digital technologies.

#### **Observational, post-implementations, pragmatic sub-study**

Community Optometry practices in the Greater Manchester area will continue to refer patients with suspicious retinal disease to HES using the locally established tele-ophthalmology digital pathway. Referral recommendations will be compared against a reference standard provided by Moorfields Reading Centre to inform the assessment of real-life effectiveness and efficiency of the tele-ophthalmology referral pathway.

### *Setting*

For the C-RCT and diagnostic accuracy study, patients will be recruited at 24 optometry practices (clusters) in the catchment areas of 4 HES sites: Moorfields Eye Hospital NHS Foundation Trust (8-10 practices), Birmingham University Hospitals NHS Foundation Trust (4-6 practices), Central Middlesex Hospital at London North West University Healthcare NHS Trust (4-6 practices) and North West Anglia NHS Foundation Trust (4-6 practices). 12 clusters (each cluster is an optometry practice) will be randomised to standard care and 12 clusters to the intervention (tele-ophthalmology). This selection of sites includes urban, sub-urban and rural locations within the UK allowing the inferences made from this study to be applicable to more of the UK population. 2 additional optometry practices (clusters) will be randomised (1:1) in a reserve capacity in case of a cluster drop-out or in order to accelerate the recruitment process. (**Appendix 1**)

1  
2  
3 For the pragmatic, observational, post-implementation sub-study, patients will be recruited at 12  
4 optometry practices (clusters) in the catchment area of Manchester University NHS Foundation Trust.  
5 These practices have adopted a tele-ophthalmology referral pathway as standard practices.  
6

7  
8 Eligible practices need to have OCT devices and the activity volume and track record of referral to  
9 HES that will allow achieving the per practice recruitment target.  
10

11 All OCT scans and clinical vignettes from each case will be transferred to the Moorfields Reading  
12 Centre that will provide the reference standard (diagnosis and referral recommendation). All suitable  
13 OCT scans will be processed by the DeepMind algorithm at the Moorfields Reading Centre in 'real-  
14 time' for the AI diagnostic accuracy study.  
15  
16

### 17 18 19 *Participants*

20  
21 Adults ( $\geq 18$  years) attending for an eye examination at the participating community optometry  
22 practices who undergo an OCT scan will be considered for participation in the study. Only people with  
23 a suspicion of retinal disease in the opinion of the community optometrist will be recruited in the RCT  
24 and diagnostic accuracy study. As entire optometry practices (clusters) will be randomised into  
25 standard care or tele-ophthalmology, patients who are approached and agree to take part in the study  
26 will consent (**Appendix 2**) to data collection and analysis - there will not be patient-level  
27 randomisation. The patient-level inclusion criteria are outlined in **Box 2**.  
28  
29  
30  
31

#### 32 33 **Box 2. Patient-level selection criteria**

##### 34 35 **Inclusion Criteria**

- 36 ○ Able to give consent and understand the study
- 37 ○ Able to cooperate by following study specific instructions
- 38 ○ Adults ( $\geq 18$  years) attending the involved community optometry practices who underwent an  
39 OCT scan
- 40 ○ Individuals who at the opinion of the community optometrist have any suspicion of a retinal  
41 condition (including atrophic ("dry") AMD, wet AMD, diabetic retinopathy, macular oedema,  
42 macular holes, epiretinal membranes, central serous chorio-retinopathy, genetic eye  
43 disease)
- 44 ○ Macular OCT scan performed at community optometry  
45

##### 46 47 **Exclusion Criteria**

- 48 ○ Individuals with any non-retinal ocular co-morbidities in either eye other than cataract
- 49 ○ Individuals with media opacities, inability to position or fixate or any other reason that  
50 prevents acquisition of good quality OCT scans (at the discretion of the community  
51 optometrist)  
52  
53  
54  
55  
56  
57  
58  
59  
60

### *Allocation to trial groups*

Simple randomisation will be performed for involved optometry practices into the intervention and control arms. Randomisation will be performed with the unit of allocation being the cluster rather than the individual and allocation concealment will be at the cluster level. Optometry practices will be randomised 1:1 to standard care or tele-ophthalmology stratified by the hospital site. Optometry practices are committed to the allocated study arm for the duration of the recruitment period or until they have recruited the minimum of the per cluster recruitment range (10 patients).

#### **Superiority C-RCT of Tele-Ophthalmology Pathway**

Community optometry practices will be randomised to either continue with standard care for referral of retinal disease to hospital-based eye clinics or move to the tele-ophthalmology digital referral pathway (Figure 1).

**Intervention arm for Superiority C-RCT: Digital Pathway** The intervention pathway is the tele-ophthalmology model for referral of patients with suspicion of retinal disease from community optometry to HES using a digital referral platform. Patients who attend at participating community optometry practices will undergo a clinical assessment and OCT scan.

#### **Figure 1. Superiority cluster randomised trial arms.**

Participants' OCT scan and clinical information will be transferred via the digital referral platform to corresponding HES. In each case, human expert clinicians based in HES (ophthalmologists or specialist optometrists with a minimum of two years' experience of independent practice in the context of HES retinal clinics) will make a referral decision remotely ('tele-HES') after review of OCT scan and clinical information on the digital referral platform. A referral recommendation by the community optometrist will also be recorded but not acted upon, to measure the proportion of correct/incorrect referrals in each arm. **(Appendix 3).**

The remote review of OCT scans and clinical data at 'tele-HES' will be performed by expert clinicians (medics or specialist optometrists) experienced in retinal clinics (minimum of two years' experience of independent practice in the context of retinal clinics in HES) based at Moorfields Eye Hospital, Central Middlesex Hospital, North West Anglia NHS Foundation Trust Hospitals or Queen Elizabeth Hospital Birmingham with access to senior advice by Consultant Ophthalmologists specialising in retinal disease.

#### **Control arm for Superiority C-RCT: Standard Practice**

The control pathway is standard practice for referral of patients with suspicion of retinal disease from community optometry to HES. Patients who attend a participating community optometry practice will undergo a clinical assessment and OCT scan. Patients with a suspicion of any retinal disease in the opinion of the community optometrist will be included in the study and will receive a referral decision (refer urgently to HES; refer routinely to HES; don't refer to HES) by the community optometrist. All OCT scans and a clinical vignette from each case will be transferred to the Moorfields Reading Centre that will provide the reference standard for referral recommendations.

### Diagnostic Accuracy Study

All referred and non-referred cases (from the standard care and tele-ophthalmology arm above; **Figure 2**) will be included in the AI diagnostic study. All suitable OCT scans will be transferred prospectively on a weekly basis to the Moorfields Ophthalmic Reading Centre. OCT scans will be processed by the Moorfields-DeepMind AI system and end-to-end timing of the process will be captured for each case. For each case the Moorfields-DeepMind AI will provide a:

1. Diagnosis
2. Decision to refer or not
3. Urgency of referral (routine or urgent)

### **Figure 2. Diagnostic accuracy study arms.**

#### *Safety Net*

In cases where 'tele-HES' decision is 'don't refer', the patient will be provided with additional information and alerts for clinical symptoms that should prompt a visit directly to the A&E department of the corresponding secondary care site (Moorfields Eye Hospital, Central Middlesex Hospital, North West Anglia NHS Foundation Trust Hospitals or Queen Elizabeth Hospital Birmingham). Additionally, in cases where a disagreement is found between the decision by the community optometrist and the one made in 'tele-HES', patients will be offered a follow-up appointment at the community optometry practice within 4 weeks.

#### *Reference Standard*

OCT scans from the standard care and tele-ophthalmology arms will be transferred to the Moorfields Ophthalmic Reading Centre. The reference standard will be provided by the expert Ophthalmic Reading Centre for the C-RCT, diagnostic accuracy study, and the Pragmatic sub-study. The reference standard will be the referral decisions and disease diagnosis made at the Reading Centre on the basis of review of images and clinical history and will apply to the RCT, the AI Diagnostic Accuracy study and the Post-implementation, Pragmatic sub-study. Specifically, for each patient, the OCT scan (including b-scans and colour fundus image) and a clinical vignette including visual acuity, age, symptoms, ocular and systemic history will be reviewed by two expert graders. The process to be followed is double-grading with adjudication by a senior retinal specialist at the Moorfields Reading Centre.

#### *Outcome Measures*

The outcomes for the superiority C-RCT and diagnostic accuracy study are outlined in **Box 3**.

#### **Box 3. Study outcomes**

| Superiority C-RCT | Diagnostic Accuracy Study | Pragmatic Sub Study |
|-------------------|---------------------------|---------------------|
|                   |                           |                     |

|                                                                                                                                                                                                                                                                                                                                                                                                                                                                                                                                                                                                                                                                                                                                                                                                                                                                                                                                                                                  |                                                                                                                                                                                                                                                                                                                                                                                                                                                                                                                                                                                                                                                                                                                                                                                                                                                                                                 |                                                                                                                                                                                                                                                                                                                                                                                                                                                                                                                                                                                                                                                                                                                                                                         |
|----------------------------------------------------------------------------------------------------------------------------------------------------------------------------------------------------------------------------------------------------------------------------------------------------------------------------------------------------------------------------------------------------------------------------------------------------------------------------------------------------------------------------------------------------------------------------------------------------------------------------------------------------------------------------------------------------------------------------------------------------------------------------------------------------------------------------------------------------------------------------------------------------------------------------------------------------------------------------------|-------------------------------------------------------------------------------------------------------------------------------------------------------------------------------------------------------------------------------------------------------------------------------------------------------------------------------------------------------------------------------------------------------------------------------------------------------------------------------------------------------------------------------------------------------------------------------------------------------------------------------------------------------------------------------------------------------------------------------------------------------------------------------------------------------------------------------------------------------------------------------------------------|-------------------------------------------------------------------------------------------------------------------------------------------------------------------------------------------------------------------------------------------------------------------------------------------------------------------------------------------------------------------------------------------------------------------------------------------------------------------------------------------------------------------------------------------------------------------------------------------------------------------------------------------------------------------------------------------------------------------------------------------------------------------------|
| <p>Primary Outcome C-RCT:<br/>Proportion of false positive referrals in the current referral pathway and the tele-ophthalmology referral pathway.</p>                                                                                                                                                                                                                                                                                                                                                                                                                                                                                                                                                                                                                                                                                                                                                                                                                            | <p>Primary outcome diagnostic accuracy study:<br/>Diagnostic accuracy of the referral decision made by the Moorfields-DeepMind AI (refer to HES, do not refer to HES) against the Reference Standard (Moorfields Reading Centre).</p>                                                                                                                                                                                                                                                                                                                                                                                                                                                                                                                                                                                                                                                           |                                                                                                                                                                                                                                                                                                                                                                                                                                                                                                                                                                                                                                                                                                                                                                         |
| <p>Secondary outcomes C-RCT:</p> <ol style="list-style-type: none"> <li>1. Proportion of wrong diagnosis and wrong referral urgency in standard and tele-ophthalmology pathways against the reference standard</li> <li>2. Proportion of false negative referrals, as well as sensitivity and specificity in standard and tele-ophthalmology pathways against the reference standard</li> <li>3. Time from referral to consultation for urgent and routine referrals in standard and tele-ophthalmology pathways</li> <li>4. Time from referral to treatment for urgent maculopathies in standard and tele-ophthalmology pathways</li> <li>5. Number of uncommon referrals (rare disease) that can be safely triaged in the tele-ophthalmology pathway</li> <li>6. Within trial cost-effectiveness and cost-consequences of the tele-ophthalmology digital pathway compared with standard care</li> <li>7. Modelled cost-consequences and net benefits of alternative</li> </ol> | <p>Secondary outcomes diagnostic accuracy study:</p> <ol style="list-style-type: none"> <li>1. Sensitivity and specificity of Moorfields-DeepMind AI for the diagnosis of retinal disease</li> <li>2. Sensitivity and specificity of Moorfields-DeepMind AI for referral urgency</li> <li>3. Proportion of false positive referrals in the standard and tele-ophthalmology pathways when human assessors are replaced by the AI DSS</li> <li>4. Proportion of wrong diagnosis and wrong referral urgency in the standard and tele-ophthalmology pathways when human assessors are replaced by AI DSS</li> <li>5. Uptime and end-to-end inference speed of technical infrastructure supporting the AI DSS</li> <li>6. Average time of end-to-end output (referral recommendation) by the AI DSS</li> <li>7. Cost-consequences and net benefits of AI-enabled digital referral pathway</li> </ol> | <p>Secondary outcomes of pragmatic sub study:</p> <ol style="list-style-type: none"> <li>1. Proportion of false positive referrals in the tele-ophthalmology referral pathway against the Reference Standard and the intervention arm in the main RCT.</li> <li>2. Proportion of wrong diagnosis and wrong referral urgency in the tele-ophthalmology pathway compared against the Reference Standard and the intervention arm in the main RCT study</li> <li>3. Proportion of false negative referrals compared against the Reference Standard and the intervention arm in the main RCT study</li> <li>4. Time from referral to review and/or treatment in HES for urgent referral) in the post-implementation real-life tele-ophthalmology digital pathway</li> </ol> |



|                                    |  |  |
|------------------------------------|--|--|
| diagnostic and referral strategies |  |  |
|------------------------------------|--|--|

### *Patient and Public Involvement*

Patient and public members were consulted prior to the trial protocol design on perception of tele-ophthalmology and issues of data privacy, impersonal care, trust in the technology, confidence in the quality of care provided through digital means were explored. A patient and public involvement group based at Moorfields Eye Hospital was consulted during the trial design to advise on barriers to recruitment, issues around geographical spread of study sites and patient information material. After study commencement, the PPI group is planned to meet yearly and an end-of-study debrief is planned with all PPI contributors, which will include discussions of the prioritisation and dissemination of study results both to the public as well as relevant healthcare professionals.

## DATA ANALYSIS PLAN

### *Statistical Analysis*

In the Superiority C-RCT of tele-ophthalmology pathway study, the primary analysis will be conducted following an intention-to-treat principle where all randomised patients are analysed in their allocated group whether or not they receive their randomised management plan. The primary outcome is the proportion of false referrals, measured at the patient level. This will be compared between management groups using logistic regression adjusting for clustered centres. Outcomes will be reported as adjusted odds ratios.

In the AI diagnostic accuracy study, we will report estimates of sensitivity and specificity of the DeepMind algorithm for referral decisions with 95% confidence intervals. Our primary analysis will combine urgent and standard referral to HES and compare against no referral to HES but a sensitivity analysis will be conducted to evaluate urgent referrals. The full statistical consideration and analysis is provided in **Appendix 4**.

### *Implementation Science Study Components*

#### **Focus of Analysis**

The primary focus for analysis will be on facilitators and barriers to implementation of the tele-ophthalmology system and the introduction of Artificial Intelligence Decision Support across clinical contexts, along with accounts of how it changes workflow and patient experience. Evaluation will be formative, so as to inform future implementations and also to contextualise the analyses of clinical effectiveness and cost effectiveness. For the AI DSS, questions to be included in interviews will involve whether the AI is to be used as decision aid (e.g., as a filter for disease/no disease) or as a completely independent decision making tool, issues around trust in the technology, perceptions of medicolegal concerns (who is responsible for the decisions?), the optimal place in the care pathway for positioning the AI (high street optician or hospital-based eye services or both), concerns such as de-skilling of practitioners (as diagnostic decisions may be devolved to AI), reduced employment opportunities, the need for a 'safety net'/quality check to oversee and 'sanity check' the performance of the AI system, and impersonal care for patients, and perceived benefits such as more efficient and appropriate care, greater confidence in the process, etc. We will also particularly focus on the question of 'interpretability' of AI DSS and the 'black box' phenomenon and whether it influences trust and potential uptake of this technology. The 'interpretability' of AI DSS is a major factor in technology uptake and may influence the direction of AI DSS developers towards more interpretable technologies.

The data collected from sites with established tele-ophthalmology pathways (Greater Manchester) will be particularly valuable for identifying barriers to implementation in a real-life context that wouldn't be picked up in the controlled environment of the RCT such as technical, staffing, training and human factors. Such barriers can be consequential with respect to patient safety as they have the potential to lead to delays in clinical review or missed cases and therefore the post-implementation sub-study

1  
2  
3 offers an opportunity to explore potential safety signals of the tele-ophthalmology pathways not  
4 typically observable in the context of RCT trials.  
5

### 6 **Human-Computer Interaction (HCI) Analysis**

7  
8 As noted above, the aims of the HCI analyses are to assess the barriers and enablers for the  
9 adoption of the proposed digital technologies in the context of referral pathways between community  
10 optometry and HES through a Human-Computer Interaction approach.  
11

12 In order to capture patient and staff perspectives of tele-ophthalmology models of care as well as AI  
13 DSS, we will take a qualitative approach, conducting interviews and observations in both community  
14 optometry and HES. A full account on sampling, recruitment and analysis methods is provided in  
15 **Appendix 1**. We will compare people's expectations (what they believe they will want and use) with  
16 their experiences when they have access to the relevant technology. In order to compare  
17 expectations against experiences, we will gather data in a variety of settings over the course of the  
18 project:  
19  
20  
21  
22

- 23 ● *In the first six months* of the project, the focus will be on understanding the adoption process  
24 and factors that contribute to success in adoption. Longitudinal data will be gathered at three  
25 selected sites: two optometry practices and the Birmingham HES. Data gathering will focus  
26 on expectations and current work practices before implementation; barriers, facilitators and  
27 experiences during implementation; and perceptions and practices post-implementation.  
28
- 29 ● *Over the subsequent 12 months* (months 7-18), similar data gathering and analysis methods  
30 will be adopted in two optometry practices that are already experienced in using tele-  
31 ophthalmology (sites that have already adopted tele-ophthalmology in the Greater  
32 Manchester area); two practices that are not using tele-ophthalmology and have no  
33 immediate plans to transition (control sites for the quantitative studies described above); and  
34 a second HES (Moorfields Eye Hospital). The focus will be on understanding workflows,  
35 practices and user requirements, including facilitators and barriers to adoption; and identifying  
36 factors that shape attitudes to the AI DSS, and how to present information to instill  
37 appropriate confidence.  
38  
39  
40  
41  
42  
43  
44  
45

### 46 **Economic Analysis**

#### 47 **Cost-Consequence Analysis**

48 The economic evaluation will comprise a within trial cost-consequence analysis (CCA) directly  
49 comparing the tele-ophthalmology pathway with the current referral pathway. This analysis highlights  
50 the choices and trade-offs between the modalities of care provision without an explicit synthesis of data  
51 into a single measure of efficiency. The results for the cost-consequence analysis will be presented as  
52 a balance sheet, which will include point estimates and appropriate measures of variance. From an  
53 NHS perspective, costs such as hospital visits, medications and community GP visits will be costed.  
54 Unit costs for resource use will be derived from published sources e.g. NHS Reference Costs and Unit  
55 Costs of Health and Social Care.[13] When considering the addition of the community optometry  
56  
57  
58  
59  
60

1  
2  
3 perspective, the costs to purchase and maintain an OCT scanner will be considered. The costs of  
4 acquisition will be derived from market prices and converted into a cost per patient using standard  
5 economic methodology.[14] In addition to this, the costs of the Moorfields-DeepMind algorithm will be  
6 considered within trial analysis. We will base this cost on advice from the algorithm owners as well as  
7 consideration of analogous algorithms. We expect there to be considerable uncertainty around the price  
8 to the NHS as a market price is not available. Therefore, we will explore the impact on efficiency of a  
9 range of prices. This will help decision-makers consider the maximum price they might be willing to pay  
10 for this algorithm given the benefits it may provide. In addition to the costs of running the algorithm in  
11 terms of hardware, software and staff, required will be considered. This will be based upon its use within  
12 the study and advice from members of the study. A sensitivity analysis will be carried out to explore  
13 how the adoption of different perspectives (i.e. who is bearing the costs) will affect the cost effectiveness  
14 of the intervention. Outcomes which may be included in this CCA are; false positives, false negatives,  
15 unnecessary hospital visits and duration of the time spent with an untreated macular disorder. These  
16 will be compared to the costs of provision and of the intervention and with the results of the Discrete  
17 Choice Experiment (DCE) described below. Costs that will be included will be those that fall on the NHS  
18 and community optometry practices. Deterministic sensitivity analysis e.g. variations in unit costs, will  
19 also be conducted. The consequences for each of the comparators will be based upon a further  
20 consideration of outcomes (for example necessary referrals missed, correct referrals, individuals  
21 correctly not referred). The likelihood of these different outcomes (given as percentages) will be  
22 described.

23  
24 To include insights derived from the pragmatic post-implementation study, the economic evaluation will  
25 also provide the following additional elements:

- 26 1. The Manchester sub-study group will inform estimates of the cost of the intervention, as  
27 delivered in a 'real world' application which may be more realistic than those estimated from a  
28 trial setting.
- 29 2. The Manchester sub-study group will be used to inform an exploratory analysis. In this the  
30 costs and consequences of the real life sub-study group will be compared to the results from  
31 the trial group to identify if there is any meaningful difference between the two sets of data  
32 and identify what the driving factors are. As a safety analysis will be carried out as part of a  
33 sub-study, the cost and consequences of any unexpected adverse events that are recorded  
34 will be included in the cost consequence analysis. If any safety events become apparent  
35 during the design of the Discrete Choice Experiment then these may be used as the basis of  
36 different attributes and levels in the study design.

### 37 38 39 40 41 42 43 44 45 46 47 48 49 50 51 52 53 **Discrete Choice Experiment (DCE)**

54 In addition to the CCA economic evaluation a Discrete Choice Experiment (DCE) will be carried out to  
55 assess preferences of the general public about the tele-ophthalmology pathway. A DCE is an attribute-  
56 based survey method for measuring benefits. It offers participants at least two alternative choices which  
57 vary across several attributes of interest. These can include several attributes of how the intervention  
58 is provided and its effect on health and other outcomes. Each of these attributes can vary over a range  
59  
60

1  
2  
3 of levels. The choice of DCE attributes for this intervention will be informed from existing literature on  
4 macular disease and provision of eye care service. The output of the qualitative study will also be  
5 examined for any attributes which could affect the preferences of the users of the service. The DCE will  
6 also be used to value in monetary terms the relative importance of the different consequences included  
7 in the CCA. To do this it will use methods previously successfully used in other NIHR funded studies.[15,  
8 16] The results of this monetary value will be used to inform a further cost benefit analysis.

### 12 **Cost Benefit Analysis**

13 The results of the DCE will be used to value the outcomes described in the cost-consequence analysis.  
14 Outcomes will be expressed as a net monetary benefit by combining the differences in each outcome  
15 by the willingness to pay for a unit change in that outcome. These values are known as willingness to  
16 pay (WTP) values and will be derived from the DCE described above. Cost will be included as part of  
17 the attributes that participants choose between so that participants can express their WTP values for a  
18 described outcome. The cost of the providing the outcome will be derived from the unit costs described  
19 earlier. A net benefit in monetary terms for these outcomes will be derived by subtracting the cost of  
20 the outcome from the WTP value (including a negative net benefit).

21 The values for the cost attribute will be based on pilot work and reviews of prior studies in this area for  
22 example Burr et al. (2012) valued an intervention to monitor ocular hypertension to prevent glaucoma  
23 using a DCE. The range of values was between £15-70 (GBP 2012). Similarly, Shih et al. (2007)  
24 assessed the WTP for a diabetic retinopathy screening service and reported a narrower range of  
25 between \$4-\$24 (USD 2007).[17] After the attributes have been established then the piloting stages will  
26 occur. A survey company will be utilised to gain a large enough sample (www.researchnow.co.uk). The  
27 participants will be offered a small incentive (£1-£2) to complete the survey. The overall sample will be  
28 representative as closely as possible for factors such as age, sex and ethnic background for the UK  
29 population. Optimal sample size requirements for the limited dependent variable models estimated in  
30 DCEs depend on knowledge of the true choice probabilities, which are not known prior to undertaking  
31 this research. However, previous DCE studies have shown that robust choice models can be estimated  
32 from sample sizes between 50-100 respondents. As such, a small pilot sample of 100 participants will  
33 be used as a sample to monitor the rate of completion and to carry out preliminary analysis and change  
34 any parts of the survey that are necessary. After the preliminary analysis is carried out, then a further  
35 sample of 300 participants will be surveyed which will be sample size comparable to other HTAs in this  
36 area. The results of the DCE will be analysed using conditional logit regression analysis, which will  
37 measure the direction and strength of the participant preferences. Sub-group analysis will also be  
38 carried out to see if factors such as age, sex or ethnic background have any effect on the resulting  
39 preferences. Probabilistic and deterministic sensitivity analyses will be carried out to vary parameter  
40 uncertainty for both the costs and the effects. Results of the probabilistic sensitivity analysis will be  
41 presented as point estimates of net-benefits, plots of costs and benefits net benefit curves, which show  
42 the likelihood of each intervention being most likely to have the highest net benefit.

### *Dissemination of Results*

Findings will be reported through academic journals in ophthalmology, health services research and HCI; some will focus on findings from the HCI studies, and some will relate findings to those of the parallel studies covering other themes. PPI workshops will be organised in Birmingham and London before the main study period, with a focus on designing the study adapting the model from an earlier project (the “before” study is reported by Furniss et al., 2016).[18]

## **ETHICAL CONSIDERATIONS**

The research project will adhere to the UK Framework for Health and Social Care research. Ethics approval has been obtained for this project. No particular challenges are expected given the low risk nature of the intervention of the RCT, the safety net arrangements for cases not referred to HES from community optometry, the observational design of the AI diagnostic accuracy study, and the relatively low personal sensitivity of the topics to be investigated in the HCI studies.

Patients lacking capacity or unable to understand the study will not be eligible. A record will be kept at each optometry site that captures reasons for patients not recruited on the study. As recruitment will take place at community optometry practices, translator services will not be provided.

## **FUNDING**

The project is funded by an NIHR Health Technology Assessment grant (HTA - Project: 18/182 HTA Digital Technologies to Improve Health and Care).

## REFERENCES

- 1 The Royal College of Ophthalmologists, 2021. *The Way Forward*. [online] Rcopth.ac.uk. Available at: <<https://www.rcophth.ac.uk/wp-content/uploads/2015/10/RCOphth-The-Way-Forward-Executive-Summary-300117.pdf>> [Accessed 9 June 2021].
- 2 NHS Digital. 2020. *Hospital Outpatient Activity 2019-20: Main Specialty*. [online] Available at: <<https://digital.nhs.uk/data-and-information/publications/statistical/hospital-outpatient-activity/2019-20>> [Accessed 9 June 2021].
- 3 Dabasia P, Edgar D, Garway-Heath D, et al. A survey of current and anticipated use of standard and specialist equipment by UK optometrists. *Ophthalmic and Physiological Optics* 2014;34(5):592-613.
- 4 Looker H, Nyangoma S, Cromie D, et al. Rates of referable eye disease in the Scottish National Diabetic Retinopathy Screening Programme. *British Journal of Ophthalmology* 2014;98(6):790-795.
- 5 Konstantakopoulou E, Harper R, Edgar D, et al. Clinical safety of a minor eye conditions scheme in England delivered by community optometrists. *BMJ Open Ophthalmology* 2018;3(1):p.e000125.
- 6 MacEwen C. 2016. *Increasing demand on hospital eye services risks patients losing vision - The Royal College of Ophthalmologists*. [online] The Royal College of Ophthalmologists. Available at: <<https://www.rcophth.ac.uk/2016/03/increasing-demand-on-hospital-eye-services-risks-patients-losing-vision/>> [Accessed 9 June 2021].
- 7 McCormick E. 2017. *OCT rollout in every Specsavers announced*. [online] Aop.org.uk. Available at: <<https://www.aop.org.uk/ot/industry/high-street/2017/05/22/oct-rollout-in-every-specsavers-announced>> [Accessed 9 June 2021].
- 8 Kortuem K, Fasler K, Charnley A, et al. Implementation of medical retina virtual clinics in a tertiary eye care referral centre. *British Journal of Ophthalmology* 2018;102(10):1391-1395.
- 9 De Fauw J, Ledsam J, Romera-Paredes B, et al. Clinically applicable deep learning for diagnosis and referral in retinal disease. *Nature Medicine* 2018;24(9):1342-1350.
- 10 Campbell M, Piaggio G, Elbourne D, et al. Consort 2010 statement: extension to cluster randomised trials. *BMJ* 2012;345(sep04 1):pp.e5661-e5661.
- 11 Bossuyt P, Reitsma J, Bruns D, et al. STARD 2015: an updated list of essential items for reporting diagnostic accuracy studies. *BMJ* 2015:p.h5527.
- 12 Sounderajah V, Ashrafian H, Aggarwal R, et al. Developing specific reporting guidelines for diagnostic accuracy studies assessing AI interventions: The STARD-AI Steering Group. *Nature Medicine* 2020;26(6):807-808.
- 13 Curtis L and Burns A. *Unit Costs of Health and Social Care 2019*. Canterbury: Personal Social Services Research Unit, University of Kent 2019:p.176.
- 14 Drummond M. *Methods for the economic evaluation of health care programmes*. Oxford: Oxford University Press 2005.

- 1  
2  
3 15 Burr J, Botello-Pinzon P, Takwoingi Y, et al. Surveillance for ocular hypertension: an evidence  
4 synthesis and economic evaluation. *Health Technology Assessment* 2012;16(29).  
5  
6 16 McCormack K, Wake B, Perez J, et al. Laparoscopic surgery for inguinal hernia repair: systematic  
7 review of effectiveness and economic evaluation. *Health Technology Assessment* 2005;9(14).  
8  
9 17 Shih H, Chou P, Chen S, et al. A Community-based Study of the Willingness to Pay Associated  
10 with Screening for Diabetic Retinopathy among Type 2 Diabetes in Kinmen, Taiwan. *Journal of*  
11 *Epidemiology* 2007;17(6):186-193.  
12  
13 18 Furniss D, Iacovides I, Lyons I, et al. Patient and public involvement in patient safety research: a  
14 workshop to review patient information, minimise psychological risk and inform  
15 research. *Research Involvement and Engagement* 2016;2(1).  
16  
17  
18  
19  
20  
21  
22  
23  
24  
25  
26  
27  
28  
29  
30  
31  
32  
33  
34  
35  
36  
37  
38  
39  
40  
41  
42  
43  
44  
45  
46  
47  
48  
49  
50  
51  
52  
53  
54  
55  
56  
57  
58  
59  
60



# CONSORT Tele-Ophthalmology Superiority Cluster Randomised Trial

1  
2  
3  
4  
5  
6  
7  
8  
9  
10  
11  
12  
13  
14  
15  
16  
17  
18  
19  
20  
21  
22  
23  
24  
25  
26  
27  
28  
29  
30  
31  
32  
33

Allocated to intervention  
(n= 170, 12 clusters, 14 patients/cluster):  
OCT and 'Smart History' transferred to NHS via Tele-ophthalmology  
Decision by human expert: not refer, refer routinely, refer urgently

Allocation

Allocated to control  
(n=170, 12 clusters, 14 patients/cluster):  
Decision by Community Optometrist review: not refer, refer routinely, refer urgently

Rate of false positive referrals  
Secondary analysis: rate of wrong diagnosis, wrong referral urgency, false negative referrals, time to consultation, time to treatment, economic and HCI analysis

Analysis

Rate of false positive referrals  
Secondary analysis: rate of wrong diagnosis, wrong referral urgency, false negative referrals, time to consultation, time to treatment, economic and HCI analysis

# STARD Artificial Intelligence Observational Prospective Diagnostic Study

OCTs analysed by the Moorfields-Deepmind  
Algorithm (n=500, Index test):  
Diagnosis, referral decision

Index Test:  
Refer to  
HES n=

Index Test:  
Not refer to  
HES n=

Reference  
Standard  
n=

Reference  
Standard  
n=

Correct Referral Decision (n=)  
Incorrect Referral Decision (n=)

Correct Referral Decision (n=)  
Incorrect Referral Decision (n=)

**Accuracy for referral and diagnosis**  
Cross tabulate: accuracy data for  
Optometrist, Hospital Eye Service and  
AI against reference standard

1  
2  
3  
4  
5  
6  
7  
8  
9  
10  
11  
12  
13  
14  
15  
16  
17  
18  
19  
20  
21  
22  
23  
24  
25  
26  
27  
28  
29  
30  
31  
32  
33

## Appendix

### Table of Contents

Appendix 1. Sampling, Recruitment and Analysis Methods

Appendix 2. Participant Information Sheet and Consent Form

Appendix 3. Digital Pathway Decisions

Appendix 4. Statistical Consideration

4.1 Sample Size Calculation

4.2 Statistical analysis

Appendix 5. Case Report Form

Appendix 6. Trial Documents and Subject Records

6.1 CRFs and Source Document Identification

6.2 Confidentiality of Trial Documents and Subject Records

6.3 Procedures for validation and securing of electronic clinical data systems

6.4 Data handling and record keeping

Appendix 7. References

## Appendix 1. Sampling, Recruitment and Analysis Methods

Purposive sampling techniques will be applied to recruit participants who are representative of all key patient and professional groups across all sites, including both “power users” and reluctant users. In each setting, the aim will be to interview 15 patients and up to 10 clinicians and other professionals (settings: secondary care clinics; pre-; and post-transitioning optometry practices), depending on the sizes of the clinics selected for inclusion. The interviews will be conducted by a Process Evaluation Specialist, they will be semi-structured and will be designed to address the research objectives outlined above. Probes such as anonymised screenshots from the digital referral platform and illustrative information presentation prototypes from the DeepMind algorithm will be used in interviews to support the exploration of the themes. Interview data will be transcribed and analysed by a qualitative methods expert using inductive Thematic Analysis, with a particular focus on facilitators and barriers to change, and the factors that contribute to successful change. These will include questions around trust in technology and data privacy as well as efficiency and effectiveness and changes in clinician workflow and patient experience. Data gathering and analysis will be interleaved, so that later data gathering is informed by the findings from earlier analysis.

Small-scale ethnographic observations will be conducted in all settings, observing both selected clinician-patient interactions around the diagnostic process (community optometry and HES) and clinician tele-care practices (HES). 3-5 clinician-patient consultations will be observed per setting; debrief interviews with patients will cover the same themes as the interviews with practitioners but be sensitive to the different perspectives of patients and professionals. Detailed field notes will be kept of all observations. This data will also be subjected to thematic analysis, focusing on workflows, variability in workflows, and any problems experienced during the interaction (particularly related to technology use).

Patients will be invited to participate at the time that they receive their appointment letter, so that they have time to consider whether they wish to do so (for informed consent), and to plan their clinic visit time to accommodate a short interview (15 mins approx.) after their appointment. On the day of the visit the investigator will provide the patient information leaflet (PIS; **Appendix 1**) to the patient and go through it highlighting what the purpose of the study is, what it entails if the patient decides to take part and possible advantages and disadvantages and risks of taking part. When the patient has had ample time to read the PIS and ask questions regarding the study, the patient will be asked to sign an informed consent form (ICF; **Appendix 1**). Once the informed consent process is complete a copy of the ICF will be provided to the participant, and the signed form will be filed in the participant’s study records. Once the informed consent process is complete, the investigator will record the decision in the case history form.

As this is a cluster randomised clinical trial, randomisation applies at the level of entire community optometry practices. The practices randomised to the intervention arm (tele-ophthalmology) will adopt this pathway for all patient referrals to secondary care as standard practice. Patient-level consent for this study pertains to allowing use of collected data for analysis but participation in the study will not

1  
2  
3 affect patient-level care. Given the urgent presentation of the patient population we will approach for  
4 participation in this study and the fact that patient management will not be influenced by  
5 randomisation as described above, a 24-hour minimum period of consideration for patient  
6 participation is not warranted. Patients approached for participation will be given the study-specific  
7 PIS and adequate time to have any queries addressed by the clinical team before deciding on  
8 participation to the study.  
9  
10  
11  
12  
13  
14  
15  
16  
17  
18  
19  
20  
21  
22  
23  
24  
25  
26  
27  
28  
29  
30  
31  
32  
33  
34  
35  
36  
37  
38  
39  
40  
41  
42  
43  
44  
45  
46  
47  
48  
49  
50  
51  
52  
53  
54  
55  
56  
57  
58  
59  
60

## Appendix 2. Participant Information Sheet and Consent Form

### Patient Information Sheet

**Study title:** Tele-ophthalmology-enabled and Artificial Intelligence-ready referral pathway for community optometry referrals or retinal disease: a cluster Randomised Superiority trial with a linked Observational Diagnostic Accuracy Study

**Short title:** HERMES

**Protocol Reference Number:** BALK1006

We would like to invite you to take part in our research study. Before you decide we would like you to understand why the research is being done and what it would involve for you. One of our team will go through the information sheet with you and answer any questions you have. We'd suggest this should take about 15 minutes. Talk to others about the study if you wish.

Part 1 tells you the purpose of this study and what will happen to you if you take part. Part 2 gives you more detailed information about the conduct of the study.

Ask us if there is anything that is not clear. Take time to decide whether or not you wish to take part.

#### Part 1

##### 1. What is the purpose of the study?

Early diagnosis of retinal condition (including Age-related Macular degeneration) is classified using imaging technology called Optical coherence tomography (OCT). This technology is becoming more available in community based optometry practices (high street optometry practices); however, interpreting the imaging scans can require hospital level expertise.

As a result of this, a large proportion of patients with retinal disease are incorrectly referred to hospital based eye clinics for diagnostics and disease management. This has led to an increasing pressure on hospital eye services and can cause delay in access for patients with sight threatening disease.

In this study we will involve patients with suspected retinal condition who have attended an eye examination appointment at a participating community practice. Patients that want to take part will be referred to the hospital eye service via the standard pathway for either: urgent care, routine care or not referred at all depending on the clinical assessment and OCT scan taken by the community optometrist.

The study will seek to show that we can improve patient care by using tele-Ophthalmology technologies to manage the proportion of referrals that do not need to attend hospital eye service for consultations and can be managed safely by community based optometry practices. Half of the optometry practices involved in this study will do the referrals through a 'tele-ophthalmology' process. This means that your eye scans and other clinical information will be reviewed remotely by expert clinicians at corresponding NHS eye hospitals and they will make the referral decision instead of the optometrists.

1  
2  
3  
4  
5  
6  
7  
8  
9  
10 Your eye scans may also be processed at a later time by an Artificial Intelligence  
11 algorithm that can read the scans and also make a referral decision. The Artificial  
12 Intelligence algorithm has been developed previously through the collaboration  
13 between Moorfields Eye Hospital and Google/Deepmind. This algorithm will be  
14 introduced in the Reading Centre (Moorfields Eye Hospital NHS Trust), all data  
15 analysis will be performed within the Reading Centre (Moorfields Eye Hospital NHS  
16 Trust) and no research data will be shared or analysed externally to the research  
17 team. During this study, the Artificial Intelligence algorithm will analyse the OCT and  
18 make a recommendation on whether a referral to the hospital is needed or not; this  
19 will then be compared with the referral recommendation made by an expert clinician  
20 for your care and will not impact on your care in any way. The actual decision to  
21 refer or not will be made by a human expert in every case and not by the algorithm.  
22

23  
24 Additionally, in a sub-study we want to involve patients with suspicion of retinal  
25 disease who are already being referred to the hospital eye services via a tele-  
26 ophthalmology platform. The patient's clinical history and OCT scan will be reviewed  
27 by experts at the participating hospital eye service and a referral decision will be  
28 made remotely. This sub-study is seeking to understand what impact the introduction  
29 of tele-ophthalmology has in a real-life setting where tele-ophthalmology is already  
30 used to refer patients to the hospital eye services and also in terms of patient care  
31 and managing unnecessary referral that are made by the community based practices  
32 to the hospital based eye services.  
33

## 34 **2. Why have I been invited?**

35  
36  
37 You have been invited to take part in this study because you are attending an eye  
38 examination appointment at a participating community optometry practice that  
39 undergo OCT scans and have been diagnosed with suspicious retinal disease.  
40

## 41 **3. Do I have to take part?**

42  
43  
44 It is up to you to decide to join the study. We will describe the study and go through  
45 this information sheet. If you agree to take part, we will then ask you to sign a  
46 consent form. You are free to withdraw at any time without giving a reason. This  
47 would not affect the standard of care you receive. If you decide not to take part in the  
48 study, you will still have your normal eye examination and an eye scan.  
49

## 50 **4. What will happen to me if I take part?**

51  
52  
53 If you decide to take part in this study, you (and if applicable a witness) will be asked  
54 to sign and date a consent form. The consent form will be signed in the presence of a  
55 trained healthcare professional who will also sign and date it. You will be provided a  
56 copy of this to keep. After the consent process you will undergo a clinical assessment  
57 and have an eye scan (OCT). If you take part in the routine care arm of the study, a  
58 referral decision will be made as usual by your community optometrist who will  
59 decide whether you will need to be; referred urgently to a hospital eye service,  
60

1  
2  
3  
4 routinely or not referred at all. The referral decision will be sent as per standard  
5 practice to the corresponding hospital eye service. If you take part in the tele-  
6 ophthalmology arm of the study, expert clinicians at the corresponding NHS eye  
7 hospital will review your eye scan and other clinical information remotely and will  
8 make the referral decision.  
9

10 You will not have a choice about which arm of the study you will participate in, as the  
11 optometry practice will already have been pre-assigned either the routine referral arm  
12 or the tele-ophthalmology arm. However this will not influence in any aspect the  
13 standard of care you will receive during this visit. You will receive the same care  
14 whether you are in the routine care arm or in the tele-ophthalmology arm.

15 Only your community optometrist or an expert clinician will make a referral decision  
16 after reviewing your eye scan and clinical information, however you will not be able to  
17 decide who will make the referral decision. Additionally, a computer program (AI)  
18 may analyse your eye scan and give its own clinical diagnosis, however this will not  
19 influence the referral decision that will be made. By using this computer program we  
20 only want to obtain information that will help clinicians to make a better clinical  
21 decision and diagnosis in the future for people with retinal disease.  
22  
23

24 If you decide to take part in the sub-study, you will undergo the consent process as  
25 described above. After the consent process you will undergo a clinical assessment  
26 and have an eye scan (OCT). Your community optometrist will make a referral  
27 decision as usual who will decide whether you need to be referred urgently to a  
28 hospital eye service, routinely or not referred at all. After reviewing your eye scan,  
29 your community optometrist will send the referral via tele-ophthalmology to the  
30 corresponding NHS eye hospital. Expert clinicians at the corresponding NHS eye  
31 hospital will review your eye scan and other clinical information remotely and will  
32 make the referral decision.  
33  
34

### 35 36 **5. What are the possible risks and benefits of taking part?**

37  
38 This study has no invasive testing and no therapeutic interventions; therefore there is  
39 minimal risk to patients if they choose to participate in this study. Your eyes may be  
40 dilated during your visit for the OCT scan. This will make you sensitive to light, blur  
41 your vision and may make it difficult to focus on close up objects for 4-6 hours.  
42

43 We cannot promise the study will help you, but the information we get from this study  
44 will help improve the experience of care of people with retinal disease and improve  
45 the referral pathway between community optometry practices and the hospital eye  
46 service.  
47  
48

### 49 50 51 **6. What if there is a problem?**

52 Any complaint about the way you have been dealt with during the clinical trial or any  
53 possible harm you might suffer will be addressed. The detailed information  
54 concerning this is given in Part 2 of this information sheet. If you have any concerns  
55 or complaints you should contact your study doctor in the first instance.  
56

### 57 58 **7. Will my taking part in the study be kept confidential?**

59 Yes. We will follow ethical and legal practice and all information about you will be  
60 handled in confidence. The details are included in Part 2.



## 8. Contact Details

### Principal investigator

Name: Tel. Number:

### Research Project Manager

Name: Tel. Number:

This completes Part 1 of the Information Sheet.

If the information in Part 1 has interested you and you are considering participation, please read the additional information in Part 2 before making any decision.

## Part 2

### 9. What if relevant new information becomes available?

On receiving new information, we might consider it to be in your best interests to withdraw you from the study. If so, we will explain the reasons and arrange for your care to continue. If the study is stopped for any other reason, we will tell you why and arrange your continuing care.

### 10. What will happen if I don't want to carry on with the study?

If you withdraw from the study, we will destroy all your identifiable information, but we will need to use the data collected up to your withdrawal.

### 11. What if there is a problem?

If you have a concern about any aspect of this study, you should ask to speak to the researchers who will do their best to answer your questions .... If you remain unhappy and wish to complain formally, you can do this by contacting the PALS team at ....

If taking part in this research project harms you, there are no special compensation arrangements. If you are harmed due to someone's negligence, then you may have grounds for legal action but you may have to pay for it. Regardless of this, if you wish to complain about any aspect of the way you have been approached or treated during the course of this study, the normal National Health Service complaints mechanisms will be available to you.

### 12. Will use of my data meet the GDPR rules?

Yes, all data will be handled in accordance with the General Data Protection Regulations (GDPR) and UK Data Protection Act 2018, The Research Governance

1  
2  
3  
4 Framework for Health and Social Care and the conditions for the Research Ethics  
5 Committee favorable opinion.  
6

7 Moorfields Eye Hospital NHS Trust is the Sponsor for this study based in the United  
8 Kingdom. We will be using information from you and/or your medical records in order  
9 to undertake this study and will act as the data controller for this study. This means  
10 that we are responsible for looking after your information and using it properly.  
11

12 Your rights to access, change or move your information are limited, as we need to  
13 manage your information in specific ways in order for the research to be reliable and  
14 accurate. If you withdraw from the study, we will keep the information about you that  
15 we have already obtained.  
16

17 You can find out more about how we use your information by visiting  
18 [www.moorfields.nhs.uk/content/how-we-use-your-information](http://www.moorfields.nhs.uk/content/how-we-use-your-information) or please contact your  
19 research team (study team contact details can be found in your participant  
20 information sheet).  
21  
22

23 (SITE NAME) will use your name, and contact details to contact you about the  
24 research study, and make sure that relevant information about the study is recorded  
25 for your care, and to oversee the quality of the study. Moorfields Eye Hospital and  
26 their study collaborators (which may include Universities) will receive information  
27 from your medical record for the purposes of the study but without your name or any  
28 other personal details. (SITE NAME) will pass to Moorfields Eye Hospital this  
29 information collected from you and/or your medical records. The only people in (SITE  
30 NAME) who will have access to information that identifies you will be people who  
31 need to contact you to arrange appointments or audit the data collection process.  
32 The people who analyse the information will not be able to identify you and will not be  
33 able to find out your name or contact details. Data collected for this study, without  
34 your name or any other personal details, can be used for future research. If you  
35 agree to take part in this study, we will also specifically ask for your permission to use  
36 your data for future research. If you don't want your data to be used for any future  
37 research, you can still participate in this study.  
38  
39

40 Moorfields Eye Hospital will keep identifiable information about you from this study  
41 without your personal details for 15 years.  
42

### 43 **13. Will my GP be informed of my involvement?**

44  
45 With your permission, your GP, and other doctors who may be treating you, will be  
46 notified that you are taking part in this study.  
47  
48

### 49 **14. What will happen to the results of the research study?**

50 The results of the study will be available after it finishes and will usually be published  
51 in a medical journal or be presented at a scientific conference. The data will be  
52 anonymous and none of the patients involved in the trial will be identified in any  
53 report or publication.  
54

55 Should you wish to see the results, or the publication, please ask your study doctor.  
56  
57

### 58 **15. Who is organising and funding the research?**

1  
2  
3  
4 The study is organized by Moorfields Eye Hospitals NHS Foundation Trust and  
5 funded by the National Institute for Health Research.  
6

7  
8 **16. Who has reviewed the study?**

9 All research in the NHS is looked at by independent group of people, called a  
10 Research Ethics Committee, to protect your interests. This study has been reviewed  
11 and given favourable opinion by London – Bromley Research Ethics Committee.  
12

13  
14 **17. Further information and contact details**

15 You are encouraged to ask any questions you wish, before, during or after your  
16 treatment. If you have any questions about the study, please speak to your study  
17 Optometrists or doctor, who will be able to provide you with up to date information  
18 about the procedure(s) involved. If you wish to read the research on which this study  
19 is based, please ask your study optometrists or doctor. If you require any further  
20 information or have any concerns while taking part in the study please contact one of  
21 the following people:  
22

23  
24  
25  
26  
27 **Principle Investigator**

28 Name: Tel. Number:  
29

30  
31  
32  
33 **Research Project Manager**

34 Name: Tel. Number:  
35

36  
37  
38 If you decide you would like to take part then please read and sign the consent form.  
39 You will be given a copy of this information sheet and the consent form to keep. A  
40 copy of the consent form will be filed in your patient notes, one will be filed with the  
41 study records and one may be sent to the Research Sponsor.  
42

43 You can have more time to think this over if you are at all unsure.  
44

45 Thank you for taking the time to read this information sheet and to consider this study.  
46  
47  
48  
49  
50  
51  
52  
53  
54  
55  
56  
57  
58  
59  
60

### Appendix 3. Digital Pathway Decisions

The following scenarios can occur in the intervention arm:

1. Community optometrist recommendation: **Refer urgently to HES**—> OCT scan and clinical data are transferred to ‘tele-HES’ and reviewed within 48h remotely by human expert —> Referral Decision is made in ‘tele-HES’ (refer urgently, refer routinely, don’t refer) and fed-back to the community optometry practice to be implemented.
2. Community optometrist recommendation: **Refer routinely to HES**—> OCT scan and clinical data are transferred to ‘tele-HES’ and reviewed within 48h remotely by human expert —> Referral Decision is made in ‘tele-HES’ (refer urgently, refer routinely, don’t refer) and fed-back to the community optometry practice to be implemented.
3. Community optometrist recommendation: **Don’t refer to HES**—> OCT scan and clinical data are transferred to ‘tele-HES’ and reviewed within 48h remotely by human expert —> Referral Decision is made in ‘tele-HES’ (refer urgently, refer routinely, don’t refer) and fed-back to the community optometry practice to be implemented.

## Appendix 4. Statistical Consideration

The trial statisticians based at King's Clinical Trial Unit will write the statistical analysis plan before database lock and will perform the analysis using the Stata software (StataCorp, College Station, TX, USA).

### 4.1 Sample Size Calculation

The primary outcome is the proportion of false positive referrals. Under the current system an audit conducted at Moorfields Eye Hospital NHS Foundation Trust in September 2018 showed that 70 % of retinal referrals were false positive.[1] A pilot study on 40 patients conducted in three optometry practices showed that this could be reduced by 60 %.[1] A 95 % confidence interval computed by the modified Wald Method as advised by Agresti and Coull would extend 44.6% to 73.7%.[2] There is consensus amongst clinicians however that given the savings to the NHS and benefit to patients, slightly smaller differences would be important to detect and we have powered the study to examine a reduction to 40 % false referrals. Whilst smaller differences might yet be important it would seem unethical to power for lower than 40 % based on the observed data and clinical expertise in this area.

Although decisions for patients are made on an individual basis each patient cannot be assumed to generate independent information since they will be clustered within optometry practices. The correlation of information from patients within a cluster (the intraclass correlation) is estimated to be 0.15. We have based this intraclass correlation on previous work conducted in ophthalmology [3, 4] with a clinical outcome similar to this study. Since this is an estimate we have increased the intraclass correlation slightly to allow for the potential that patients within the same optometry practice may be more similarly managed than patients within different practices although clinical consensus is that clinical signs are more likely to impact upon decision making for referral than individual optometrist attitudes. Using nQuery software version 8.3.10, a hierarchical 2-level mixed effects model was used to calculate the required sample size. 24/26 clusters split between the study arms in a 1:1 ratio need to recruit an average of 12/10 patients per clusters (12 patients if 24 clusters, 10 patients if 26 clusters) in order to achieve 89.27% power to detect a difference in the proportion of false positive referrals of 30% (a drop from the current rate of 70% to the clinically relevant rate of 40%). This calculation assumes an intraclass correlation of 0.15 and the test is performed at the 5% significance level.

A total of 288 patients (based on an average of 12 patients recruited at 24 clusters, 144 per study arm) would therefore be needed to complete the data analysis with sufficient statistical power. To allow for an anticipated 15% drop out rate (patients are likely to be elderly and have comorbidity causing motion artefacts and some images may be ungradable), the total sample size is 340 patients (170 per study arm).

The sample size of the RCT and pragmatic sub-study combined will also enable the AI observational diagnostic accuracy study to obtain robust estimates of sensitivity and specificity. All 500 patients (accounting for the anticipated drop-out rate) will be included in the AI study. Classifications will be

1  
2  
3 made without additional clinical information. Research from our group suggests that the diagnostic  
4 accuracy of the Moorfields-DeepMind AI will be as high as 95%.[5] This combined sample of 500  
5 patients with 475 patients being correctly diagnosed would produce a two-sided 95.0% confidence  
6 interval with a width of 0.039. The sample from the RCT alone -288 patients with 274 being correctly  
7 diagnosed - produce a two-sided 95.0% confidence interval with a width of 0.052. PASS has been  
8 used to calculated these widths.  
9  
10  
11

### 12 13 **Recruitment plan**

14  
15 On the basis of feedback provided by optometry practices already identified and interested in  
16 participating in the study, an average of 3 eligible patients can be approached to consider  
17 participation in the study per month per cluster, with a range of 2-5 patients based on the size of the  
18 optometry practice. However, it is also expected that 35% of potential patients will decline to  
19 participate. Currently, different sites are at different stages of readiness for commencing recruitment  
20 and therefore a staggered start to recruitment over 3 months is embedded in the recruitment plan.  
21 Based on these conservative estimates a recruitment period of 12 months with a staggered initiation  
22 over the first 3 months will be sufficient to approach 521 patients, of whom it is expected that 340  
23 patients will be recruited to the study. A smaller practice only approaching 2 patients per month will  
24 require 11 months to recruit 12 patients (accounting for drop out and decline to participate). If the  
25 practice was one of the last to start recruitment and so started 3 months into the recruitment window,  
26 they would still manage to recruit 10 patients in 9 months (accounting for drop out and decline to  
27 participate). A larger practice in the same catchment area will be able to compensate by over-  
28 recruiting up to a set maximum of 16 patients. The range of cluster size will thus be 10-16 patients.  
29  
30  
31  
32  
33  
34  
35

36 The 2 additional randomised community practices allow the potential to increase the number of  
37 clusters to 26 if further acceleration of recruitment is required. 26 clusters will be required to recruit  
38 306 patients overall with an average of 10 patients per cluster (and a minimum of 8 patients per  
39 cluster) in order to achieve 89.27% power to detect a difference in the proportion of false positive  
40 referrals of 30% - using the same parameters as the sample size calculation for the 24 clusters.  
41  
42  
43

### 44 **Pragmatic Sub-Study**

45  
46 Manchester Eye Hospital and its local area, a site included in the original protocol, has already moved  
47 to a tele-ophthalmology referral pathway as part of a commissioning change across the local region.  
48 This change in standard care provides a unique opportunity to examine whether tele-ophthalmology  
49 works under usual conditions within the NHS. This sub-study will allow us to measure and visualise  
50 variation in quality of health care within a local region to inform our inferences from the RCT on how  
51 the tele- ophthalmology pathway will perform within a real-life setting.  
52  
53  
54

55 From this study, key estimate statistics will be calculated including the overall rate of referral to HES,  
56 the false positive (referral) and false negative rate against the Reference Standard and the proportion  
57 of wrong diagnosis and wrong referral urgency. These shall be compared to the rates found for the  
58 intervention arm of the main RCT.  
59  
60

1  
2  
3 Recruiting 18 patients from each of 12 tele-optometry practices (for a total of 216 patients) will allow  
4 the proportion of false positive referrals to be produced with a 95% confidence interval with a width  
5 less than 0.187. This was calculated based on confidence intervals for one proportion within a cluster-  
6 randomised design with an intracluster correlation of 0.15. A total of 216 patients (based on an  
7 average of 18 patients recruited from 12 clusters) would therefore provide a certain degree of  
8 precision. To allow for an anticipated 15% drop out rate (patients are likely to be elderly and have  
9 comorbidity causing motion artefacts and some images may be ungradable), the total sample size is  
10 254 patients. It is expected that 35% of participants will decline to participate and so 390 patients  
11 would need to be approached. These patients can be recruited over a period of 18 months with an  
12 average of 3 patients approached by each practice per month.  
13  
14  
15  
16  
17

## 18 **4.2 Statistical analysis**

19  
20 The primary analysis will be conducted following an intention to treat principle where all randomised  
21 patients are analysed in their allocated group whether or not they receive their randomised management  
22 plan. Baseline characteristics will be summarised for each management group (standard care or tele-  
23 ophthalmology). We will report the number of clusters in each group and the size of clusters.  
24 Continuous data will be summarised using means and standard deviations if data appear Gaussian or  
25 medians and interquartile ranges. Categorical data will be reported as proportions and percentages.  
26  
27  
28  
29

30 The primary outcome is the proportion of false referrals. The outcome is measured at the patient level.  
31 This will be compared between management groups using logistic regression adjusting for clustered  
32 centres. Outcomes will be reported as adjusted odds ratios. We will also report the difference in  
33 proportions with a 95 % confidence interval as per the CONSORT extension for cluster randomised  
34 controlled trials. We will report false referral rates with 95 % confidence intervals computed by the exact  
35 binomial method by diagnosis and by level of urgency. The results will be presented at the cluster level  
36 and overall.  
37  
38  
39

40 Secondary outcomes such as time from referral to review in HES and treatment will be analysed in a  
41 similar fashion. The percentage of patients experiencing adverse events in the two groups will be  
42 reported with 95 % confidence intervals computed by the exact binomial method.  
43  
44  
45

46 Loss to follow-up will be examined by study arm. Reasons for missingness may be important and these  
47 will be investigated using logistic regression of covariates based on an indicator of missingness. An  
48 available case analysis will be reported along with an analysis using imputed data based on best- and  
49 worst-case scenarios. Since this is a cluster RCT we will also examine and report missingness by  
50 cluster.  
51  
52  
53

54 No formal interim analysis is planned but reports concerning patient safety will be prepared for review  
55 by the Independent Data Monitoring Committee. All tests will be two sided and will be assessed at the  
56 5 % significance level unless otherwise specified. All confidence intervals will be 95 % and two sided.  
57 A detailed statistical analysis plan will be agreed with the Trial Steering Group prior to any analysis of  
58 locked data. All statistical analysis will be performed using Stata (StataCorp, College Station, TX, USA).  
59  
60

1  
2  
3 Statisticians analysing the data will be masked to the management group status of the practise and  
4 patient.  
5

6  
7 In the AI diagnostic accuracy study, we will report estimates of sensitivity and specificity of the  
8 DeepMind algorithm for referral decisions with 95 % confidence intervals. Our primary analysis will  
9 combine urgent and standard referral to HES and compare against no referral to HES but a sensitivity  
10 analysis will be conducted to evaluate urgent referrals. The referral outcome (refer routinely, refer  
11 urgently, don't refer) will be cross tabulated for the DeepMind algorithm and each of the RCT treatment  
12 arms (community optometry and 'tele-HES'), the pragmatic sub-study, and for the Reference Standard.  
13  
14  
15  
16  
17  
18  
19  
20  
21  
22  
23  
24  
25  
26  
27  
28  
29  
30  
31  
32  
33  
34  
35  
36  
37  
38  
39  
40  
41  
42  
43  
44  
45  
46  
47  
48  
49  
50  
51  
52  
53  
54  
55  
56  
57  
58  
59  
60



## Appendix 5. Case Report Form

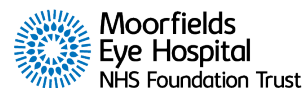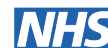**HERMES Study****Completing Case Report Forms (CRFs)**Study No:   -   

**This document has been created to provide guidelines about completing clinical trial case report forms at Moorfields Eye Hospital (MEH). The information has been extracted from the standard operating procedures (SOPs) 'Completing, Correcting & Signing off Case Report Forms (CRF\_S07)' that have been developed by the Research & Development department at Moorfields.**

1. The CRF must be completed as soon as possible after the patient has been assessed or during the assessment if the CRF is the source data.
2. CRFs must be completed using a black ink ballpoint pen.
3. If the CRF is printed on carbonless duplication paper, a suitable separator must be inserted under the form being completed.
4. Data entry into the CRF must be complete as without omissions. If data are unavailable then 'unknown', 'missing', 'test not done' etc. should be inserted. The ambiguous phrase, 'not available' should be avoided.
5. All entries into the CRF must be accurate, legible and verifiable with the source data in the medical records (unless the CRF is the source data). Data must not be invented – this is fraud.

*N.B. Whenever a subject has been seen by clinical staff for the purposes of a clinical trial, the time, date and reason for visit must always be entered into the subject's corresponding hospital notes. Copies of trial investigations/results that are clinically significant or have an impact on the patient's clinical care must also be filed in the medical notes.*

6. Any discrepancies between the CRF and the source data should be explained and the significance noted in the CRF and/or patient's medical records.
7. All CRF data derived from source documents must be transcribed exactly.
8. For laboratory values that fall outside the laboratory's reference range or trial specific range or when a value shows a significant variation from one assessment to the next, this should be commented on and the significance noted in the CRF and/or patient's medical records.
9. The subject's identity should remain confidential at all times and as such the trial subject must only be identified in the CRF using a trial number or code.
10. Entries into the CRF must never be overwritten.
11. Corrections to the CRF must be made as follows:
  - An incorrect entry must be deleted with a single line through the text allowing the incorrect entry to remain legible. Correction fluid must never be used and entries must not be obliterated.
  - The correct data must be entered.
  - The correction must be initialled and dated and an explanation given of the correction, if applicable.
12. The CRF must be signed and dated where indicated, by the chief/principal investigator or designee (for example, research nurse at the end of an assessment) to assert that he/she believes the data is completed and correct.

Study No:   -

**HERMES Study**

PATIENT DEMOGRAPHICS (Community Optometry)

Page 1/2

| ALL FIELDS ARE MANDATORY              |                                                                              |                                        |                                                           |
|---------------------------------------|------------------------------------------------------------------------------|----------------------------------------|-----------------------------------------------------------|
| <b>Patient Details</b>                |                                                                              |                                        |                                                           |
| Study site                            | MEH <input type="checkbox"/>                                                 | Manchester <input type="checkbox"/>    | Birmingham <input type="checkbox"/>                       |
|                                       | Central Middlesex <input type="checkbox"/>                                   |                                        | North West Anglia <input type="checkbox"/>                |
| Optometrist site                      |                                                                              |                                        |                                                           |
| Randomisation Cluster number          |                                                                              |                                        |                                                           |
| Randomisation Arm                     | Control <input type="checkbox"/>                                             | Intervention <input type="checkbox"/>  |                                                           |
| Age                                   | ( $\geq 18$ ) <input type="text"/> <input type="text"/> <input type="text"/> |                                        |                                                           |
| Sex                                   | Male <input type="checkbox"/>                                                | Female <input type="checkbox"/>        |                                                           |
| Medical history                       | Yes                                                                          | No                                     | Yes                                                       |
|                                       | Heart attack <input type="checkbox"/>                                        | <input type="checkbox"/>               | TIA/Stroke <input type="checkbox"/>                       |
|                                       | COPD <input type="checkbox"/>                                                | <input type="checkbox"/>               | Impaired Mobility <input type="checkbox"/>                |
|                                       | Diabetes <input type="checkbox"/>                                            | <input type="checkbox"/>               | Asthma <input type="checkbox"/>                           |
|                                       | Hypertension <input type="checkbox"/>                                        | <input type="checkbox"/>               | Other <input type="checkbox"/>                            |
| If other please specify               |                                                                              |                                        |                                                           |
| Medication for eye condition          | Yes <input type="checkbox"/>                                                 | No <input type="checkbox"/>            |                                                           |
| <i>If yes specify glaucoma drops?</i> | Prostaglandins <input type="checkbox"/>                                      | CA inhibitors <input type="checkbox"/> | B-blockers <input type="checkbox"/>                       |
| <i>If yes specify AREDS</i>           | Yes <input type="checkbox"/>                                                 | No <input type="checkbox"/>            |                                                           |
| Smoker?                               | Ex-smoker <input type="checkbox"/>                                           | Smoker <input type="checkbox"/>        | Non-smoker <input type="checkbox"/>                       |
|                                       | <b>Right Eye</b>                                                             | <b>Left eye</b>                        |                                                           |
| Ocular history                        | Yes                                                                          | No                                     | Yes                                                       |
|                                       | Wet AMD <input type="checkbox"/>                                             | <input type="checkbox"/>               | Wet AMD <input type="checkbox"/>                          |
|                                       | Dry AMD <input type="checkbox"/>                                             | <input type="checkbox"/>               | Dry AMD <input type="checkbox"/>                          |
|                                       | Central Serous Chorioretinopathy <input type="checkbox"/>                    | <input type="checkbox"/>               | Central Serous Chorioretinopathy <input type="checkbox"/> |
|                                       | Central Retinal Vein Occlusion <input type="checkbox"/>                      | <input type="checkbox"/>               | Central Retinal Vein Occlusion <input type="checkbox"/>   |
|                                       | Branch Retinal Vein Occlusion <input type="checkbox"/>                       | <input type="checkbox"/>               | Branch Retinal Vein Occlusion <input type="checkbox"/>    |
|                                       | Diabetic Macular Oedema <input type="checkbox"/>                             | <input type="checkbox"/>               | Diabetic Macular Oedema <input type="checkbox"/>          |
|                                       | Inherited Eye Disease <input type="checkbox"/>                               | <input type="checkbox"/>               | Inherited Eye Disease <input type="checkbox"/>            |
|                                       | Other <input type="checkbox"/>                                               | <input type="checkbox"/>               | Other <input type="checkbox"/>                            |
|                                       | <i>If other, specify</i>                                                     |                                        |                                                           |

Study No:   -

**HERMES Study**

PATIENT DEMOGRAPHICS (Community Optometry)

| ALL FIELDS ARE MANDATORY |                  |                          |                          |                  |                                                   |
|--------------------------|------------------|--------------------------|--------------------------|------------------|---------------------------------------------------|
| Patient Details          |                  |                          |                          |                  |                                                   |
| Previous eye procedures  |                  | Yes                      | No                       |                  |                                                   |
|                          | Cataract surgery | <input type="checkbox"/> | <input type="checkbox"/> | Cataract surgery | <input type="checkbox"/> <input type="checkbox"/> |
|                          | Glaucoma surgery | <input type="checkbox"/> | <input type="checkbox"/> | Glaucoma surgery | <input type="checkbox"/> <input type="checkbox"/> |
|                          | Eyelid surgery   | <input type="checkbox"/> | <input type="checkbox"/> | Eyelid surgery   | <input type="checkbox"/> <input type="checkbox"/> |
|                          | Other            | <input type="checkbox"/> | <input type="checkbox"/> | Other            | <input type="checkbox"/> <input type="checkbox"/> |
| <i>If other specify</i>  |                  |                          |                          |                  |                                                   |

Comments

For peer review only

**I can confirm that the patient meets all eligibility criteria for the study and I have completed this form in full and take full responsibility for any missing data.**

| <b>Signed:</b>                            | <b>Print:</b>        | <b>Date:</b>                                                                                                                      |
|-------------------------------------------|----------------------|-----------------------------------------------------------------------------------------------------------------------------------|
| <input type="text"/>                      | <input type="text"/> | <input type="text"/> / <input type="text"/> / <input type="text"/> <input type="text"/> <input type="text"/> <input type="text"/> |
| Office use only, data entry completed by: |                      |                                                                                                                                   |
| <b>Signed:</b>                            | <b>Print:</b>        | <b>Date:</b>                                                                                                                      |
| <input type="text"/>                      | <input type="text"/> | <input type="text"/> / <input type="text"/> / <input type="text"/> <input type="text"/> <input type="text"/> <input type="text"/> |

Study No:   -

**HERMES Study**

**BASELINE VISIT (Community Optometry)**

| ALL FIELDS ARE MANDATORY                      |                                                                                                                                                                                          |                                                                                       |                                |
|-----------------------------------------------|------------------------------------------------------------------------------------------------------------------------------------------------------------------------------------------|---------------------------------------------------------------------------------------|--------------------------------|
| Baseline Exam                                 |                                                                                                                                                                                          |                                                                                       |                                |
| Date of visit                                 | (dd mm yyyy) <input type="text"/> <input type="text"/> / <input type="text"/> <input type="text"/> / <input type="text"/> <input type="text"/> <input type="text"/> <input type="text"/> |                                                                                       |                                |
| Years since diagnosis of any retinal disease? | <input type="text"/> <input type="text"/>                                                                                                                                                |                                                                                       |                                |
| OCT Device                                    | Topcon 3D OCT-2000 <input type="checkbox"/>                                                                                                                                              | Heidelberg OCT1 <input type="checkbox"/>                                              | Other <input type="checkbox"/> |
| <i>If other specify</i>                       |                                                                                                                                                                                          |                                                                                       |                                |
|                                               | Right Eye                                                                                                                                                                                | Left eye                                                                              |                                |
| Visual acuity (ETDRS)                         | (ETDRS letters, range 0-95) <input type="text"/> <input type="text"/>                                                                                                                    | (ETDRS letters, range 0-95) <input type="text"/> <input type="text"/>                 |                                |
| Visual acuity (Snellen)                       | <input type="text"/> / <input type="text"/> <input type="text"/> <input type="text"/>                                                                                                    | <input type="text"/> / <input type="text"/> <input type="text"/> <input type="text"/> |                                |
| Diagnosis by the Optometrist                  |                                                                                                                                                                                          | Yes                                                                                   | No                             |
|                                               | Wet AMD                                                                                                                                                                                  | <input type="checkbox"/>                                                              | <input type="checkbox"/>       |
|                                               | Dry AMD                                                                                                                                                                                  | <input type="checkbox"/>                                                              | <input type="checkbox"/>       |
|                                               | Central Serous Chorioretinopathy                                                                                                                                                         | <input type="checkbox"/>                                                              | <input type="checkbox"/>       |
|                                               | Central Retinal Vein Occlusion                                                                                                                                                           | <input type="checkbox"/>                                                              | <input type="checkbox"/>       |
|                                               | Branch Retinal Vein Occlusion                                                                                                                                                            | <input type="checkbox"/>                                                              | <input type="checkbox"/>       |
|                                               | Diabetic Macular Oedema                                                                                                                                                                  | <input type="checkbox"/>                                                              | <input type="checkbox"/>       |
|                                               | Inherited Eye Disease                                                                                                                                                                    | <input type="checkbox"/>                                                              | <input type="checkbox"/>       |
|                                               | Other                                                                                                                                                                                    | <input type="checkbox"/>                                                              | <input type="checkbox"/>       |
| <i>If other specify</i>                       |                                                                                                                                                                                          |                                                                                       |                                |
| Clinical findings                             |                                                                                                                                                                                          | Yes                                                                                   | No                             |
|                                               | Macular Haemorrhage                                                                                                                                                                      | <input type="checkbox"/>                                                              | <input type="checkbox"/>       |
|                                               | Other Retinal Haemorrhage                                                                                                                                                                | <input type="checkbox"/>                                                              | <input type="checkbox"/>       |
|                                               | Exudates                                                                                                                                                                                 | <input type="checkbox"/>                                                              | <input type="checkbox"/>       |
|                                               | Disc Swelling                                                                                                                                                                            | <input type="checkbox"/>                                                              | <input type="checkbox"/>       |
|                                               | Macular Atrophy                                                                                                                                                                          | <input type="checkbox"/>                                                              | <input type="checkbox"/>       |
|                                               | Cotton Wool Spot                                                                                                                                                                         | <input type="checkbox"/>                                                              | <input type="checkbox"/>       |
|                                               | Other                                                                                                                                                                                    | <input type="checkbox"/>                                                              | <input type="checkbox"/>       |
| <i>If other specify</i>                       |                                                                                                                                                                                          |                                                                                       |                                |

Study No:   -

**HERMES Study**

**BASELINE VISIT (Community Optometry)**

**Page 2/2**

| ALL FIELDS ARE MANDATORY                           |                                                                                                                         |                                                                                                                         |
|----------------------------------------------------|-------------------------------------------------------------------------------------------------------------------------|-------------------------------------------------------------------------------------------------------------------------|
| Baseline Exam                                      | Right Eye                                                                                                               | Left eye                                                                                                                |
| Intraocular pressure                               | (0-60) <input type="text"/> <input type="text"/>                                                                        | (0-60) <input type="text"/> <input type="text"/>                                                                        |
| OCT taken?                                         | Yes <input type="checkbox"/> No <input type="checkbox"/>                                                                | Yes <input type="checkbox"/> No <input type="checkbox"/>                                                                |
| <i>OCT qualitative</i>                             | SRF <input type="checkbox"/> IRF <input type="checkbox"/><br>PED <input type="checkbox"/> SHRM <input type="checkbox"/> | SRF <input type="checkbox"/> IRF <input type="checkbox"/><br>PED <input type="checkbox"/> SHRM <input type="checkbox"/> |
| Referral Recommendation by Optometrist (both arms) | Urgent <input type="checkbox"/>                                                                                         | Routine <input type="checkbox"/> No referral <input type="checkbox"/>                                                   |
| <i>If not referred, specify reason</i>             |                                                                                                                         |                                                                                                                         |

Comments:

For peer review only

**I have completed this form in full and take full responsibility for any missing data.**

|                                                  |               |                                                                                                                                                                             |
|--------------------------------------------------|---------------|-----------------------------------------------------------------------------------------------------------------------------------------------------------------------------|
| <b>Signed:</b>                                   | <b>Print:</b> | <b>Date:</b>                                                                                                                                                                |
|                                                  |               | <input type="text"/> <input type="text"/> / <input type="text"/> <input type="text"/> / <input type="text"/> <input type="text"/> <input type="text"/> <input type="text"/> |
| <b>Office use only, data entry completed by:</b> |               |                                                                                                                                                                             |
| <b>Signed:</b>                                   | <b>Print:</b> | <b>Date:</b>                                                                                                                                                                |
|                                                  |               | <input type="text"/> <input type="text"/> / <input type="text"/> <input type="text"/> / <input type="text"/> <input type="text"/> <input type="text"/> <input type="text"/> |

Study No:   -

**HERMES Study**

REFERRALS (Community Optometry)

Page 1/3

| ALL FIELDS ARE MANDATORY                                                     |                                                                                                                                                                                          |
|------------------------------------------------------------------------------|------------------------------------------------------------------------------------------------------------------------------------------------------------------------------------------|
| <b>Referral Details</b>                                                      |                                                                                                                                                                                          |
| Has referral been generated?                                                 | (control arm) Yes <input type="checkbox"/> No <input type="checkbox"/>                                                                                                                   |
| If yes please specify date                                                   | (dd mm yyyy) <input type="text"/> <input type="text"/> / <input type="text"/> <input type="text"/> / <input type="text"/> <input type="text"/> <input type="text"/> <input type="text"/> |
| Referral reference number                                                    | (control arm)                                                                                                                                                                            |
| Referral system                                                              | (control arm) Post <input type="checkbox"/> Electronic <input type="checkbox"/> Other <input type="checkbox"/>                                                                           |
| If other, please specify                                                     |                                                                                                                                                                                          |
| Have OCT scans been uploaded on eCRF?                                        | (both arms) Yes <input type="checkbox"/> No <input type="checkbox"/>                                                                                                                     |
| If no, specify reason                                                        |                                                                                                                                                                                          |
| Has clinical data been uploaded on eCRF?                                     | (intervention arm) Yes <input type="checkbox"/> No <input type="checkbox"/>                                                                                                              |
| If no, specify reason                                                        |                                                                                                                                                                                          |
| Optometrist referral recommendation accepted after HES triage?               | (both arms) Yes <input type="checkbox"/> No <input type="checkbox"/>                                                                                                                     |
| If yes, eye on which referral decision was based                             | Right <input type="checkbox"/> Left <input type="checkbox"/> Both <input type="checkbox"/>                                                                                               |
| If no, referral decision after HES triage                                    | Urgent <input type="checkbox"/> Routine <input type="checkbox"/> No referral <input type="checkbox"/>                                                                                    |
| Reason why recommendation was not accepted<br>(field to be completed by HES) |                                                                                                                                                                                          |

Study No:   -   **HERMES Study**

REFERRALS (tele-HES)

Page 2/3

| ALL FIELDS ARE MANDATORY                                   |  |                                  |                                                   |                                  |                                                   |
|------------------------------------------------------------|--|----------------------------------|---------------------------------------------------|----------------------------------|---------------------------------------------------|
| <b>Tele - HES Review</b>                                   |  |                                  |                                                   |                                  |                                                   |
| OCT from referral reviewed by tele-HES?                    |  | Yes <input type="checkbox"/>     |                                                   | No <input type="checkbox"/>      |                                                   |
|                                                            |  | <b>Right Eye</b>                 |                                                   | <b>Left eye</b>                  |                                                   |
| OCT from referral <i>qualitative by tele-HES</i>           |  | SRF <input type="checkbox"/>     | IRF <input type="checkbox"/>                      | SRF <input type="checkbox"/>     | IRF <input type="checkbox"/>                      |
|                                                            |  | PED <input type="checkbox"/>     | SHRM <input type="checkbox"/>                     | PED <input type="checkbox"/>     | SHRM <input type="checkbox"/>                     |
| Clinical findings                                          |  | Yes No                           |                                                   | Yes No                           |                                                   |
|                                                            |  | Macular Haemorrhage              | <input type="checkbox"/> <input type="checkbox"/> | Macular Haemorrhage              | <input type="checkbox"/> <input type="checkbox"/> |
|                                                            |  | Other Retinal Haemorrhage        | <input type="checkbox"/> <input type="checkbox"/> | Other Retinal Haemorrhage        | <input type="checkbox"/> <input type="checkbox"/> |
|                                                            |  | Exudates                         | <input type="checkbox"/> <input type="checkbox"/> | Exudates                         | <input type="checkbox"/> <input type="checkbox"/> |
|                                                            |  | Disc Swelling                    | <input type="checkbox"/> <input type="checkbox"/> | Disc Swelling                    | <input type="checkbox"/> <input type="checkbox"/> |
|                                                            |  | Macular Atrophy                  | <input type="checkbox"/> <input type="checkbox"/> | Macular Atrophy                  | <input type="checkbox"/> <input type="checkbox"/> |
|                                                            |  | Cotton Wool Spot                 | <input type="checkbox"/> <input type="checkbox"/> | Cotton Wool Spot                 | <input type="checkbox"/> <input type="checkbox"/> |
|                                                            |  | Other                            | <input type="checkbox"/> <input type="checkbox"/> | Other                            | <input type="checkbox"/> <input type="checkbox"/> |
| If other specify                                           |  |                                  |                                                   |                                  |                                                   |
| <b>Tele-HES Review</b>                                     |  | <b>Right Eye</b>                 |                                                   | <b>Left eye</b>                  |                                                   |
| Diagnosis from referring optometrist confirmed by tele-HES |  | Yes <input type="checkbox"/>     |                                                   | No <input type="checkbox"/>      |                                                   |
| Diagnosis by tele-HES                                      |  | Yes No                           |                                                   | Yes No                           |                                                   |
|                                                            |  | Wet AMD                          | <input type="checkbox"/> <input type="checkbox"/> | Wet AMD                          | <input type="checkbox"/> <input type="checkbox"/> |
|                                                            |  | Dry AMD                          | <input type="checkbox"/> <input type="checkbox"/> | Dry AMD                          | <input type="checkbox"/> <input type="checkbox"/> |
|                                                            |  | Central Serous Chorioretinopathy | <input type="checkbox"/> <input type="checkbox"/> | Central Serous Chorioretinopathy | <input type="checkbox"/> <input type="checkbox"/> |
|                                                            |  | Central Retinal Vein Occlusion   | <input type="checkbox"/> <input type="checkbox"/> | Central Retinal Vein Occlusion   | <input type="checkbox"/> <input type="checkbox"/> |
|                                                            |  | Branch Retinal Vein Occlusion    | <input type="checkbox"/> <input type="checkbox"/> | Branch Retinal Vein Occlusion    | <input type="checkbox"/> <input type="checkbox"/> |
|                                                            |  | Diabetic Macular Oedema          | <input type="checkbox"/> <input type="checkbox"/> | Diabetic Macular Oedema          | <input type="checkbox"/> <input type="checkbox"/> |
|                                                            |  | Inherited Eye Disease            | <input type="checkbox"/> <input type="checkbox"/> | Inherited Eye Disease            | <input type="checkbox"/> <input type="checkbox"/> |
|                                                            |  | Other                            | <input type="checkbox"/> <input type="checkbox"/> | Other                            | <input type="checkbox"/> <input type="checkbox"/> |
| If other specify                                           |  |                                  |                                                   |                                  |                                                   |

Study No:   -

**HERMES Study**

**REFERRALS (tele-HES)**

**Page 3/3**

**ALL FIELDS ARE MANDATORY**

|                                                                                                                                                                           |                                 |                                  |                                      |
|---------------------------------------------------------------------------------------------------------------------------------------------------------------------------|---------------------------------|----------------------------------|--------------------------------------|
| <b>Tele - HES Review</b>                                                                                                                                                  |                                 |                                  |                                      |
| Referral recommendation by referring optometrist confirmed by tele-HES<br><i>If yes, eye on which referral decision was based</i><br><i>Referral Decision by tele-HES</i> | Yes <input type="checkbox"/>    |                                  | No <input type="checkbox"/>          |
|                                                                                                                                                                           | Right <input type="checkbox"/>  | Left <input type="checkbox"/>    | Both <input type="checkbox"/>        |
|                                                                                                                                                                           | Urgent <input type="checkbox"/> | Routine <input type="checkbox"/> | No referral <input type="checkbox"/> |

Comments:

**I have completed this form in full and take full responsibility for any missing data.**

|                                                  |               |                                                                                                                                                                             |
|--------------------------------------------------|---------------|-----------------------------------------------------------------------------------------------------------------------------------------------------------------------------|
| <b>Signed:</b>                                   | <b>Print:</b> | <b>Date:</b>                                                                                                                                                                |
|                                                  |               | <input type="text"/> <input type="text"/> / <input type="text"/> <input type="text"/> / <input type="text"/> <input type="text"/> <input type="text"/> <input type="text"/> |
| <b>Office use only, data entry completed by:</b> |               |                                                                                                                                                                             |
| <b>Signed:</b>                                   | <b>Print:</b> | <b>Date:</b>                                                                                                                                                                |
|                                                  |               | <input type="text"/> <input type="text"/> / <input type="text"/> <input type="text"/> / <input type="text"/> <input type="text"/> <input type="text"/> <input type="text"/> |



Study No:   -

**HERMES Study**

HES First Visit

Page 1/2

| ALL FIELDS ARE MANDATORY                                |                                                                                                                                                                                          |                                                                                       |
|---------------------------------------------------------|------------------------------------------------------------------------------------------------------------------------------------------------------------------------------------------|---------------------------------------------------------------------------------------|
| HES Review                                              |                                                                                                                                                                                          |                                                                                       |
| Follow up status                                        | Attended <input type="checkbox"/>                                                                                                                                                        | Cancelled <input type="checkbox"/> DNA <input type="checkbox"/>                       |
| Date of consultation                                    | (dd mm yyyy) <input type="text"/> <input type="text"/> / <input type="text"/> <input type="text"/> / <input type="text"/> <input type="text"/> <input type="text"/> <input type="text"/> |                                                                                       |
| Change in eye medication                                | Yes <input type="checkbox"/> No <input type="checkbox"/>                                                                                                                                 |                                                                                       |
| If yes, specify                                         |                                                                                                                                                                                          |                                                                                       |
| Date of first treatment (if applicable)                 | (dd mm yyyy) <input type="text"/> <input type="text"/> / <input type="text"/> <input type="text"/> / <input type="text"/> <input type="text"/> <input type="text"/> <input type="text"/> |                                                                                       |
|                                                         | Right Eye                                                                                                                                                                                | Left eye                                                                              |
| Intraocular pressure                                    | (0-60) <input type="text"/> <input type="text"/>                                                                                                                                         | (0-60) <input type="text"/> <input type="text"/>                                      |
| OCT taken?                                              | Yes <input type="checkbox"/> No <input type="checkbox"/>                                                                                                                                 | Yes <input type="checkbox"/> No <input type="checkbox"/>                              |
| OCT qualitative                                         | SRF <input type="checkbox"/> IRF <input type="checkbox"/>                                                                                                                                | SRF <input type="checkbox"/> IRF <input type="checkbox"/>                             |
|                                                         | PED <input type="checkbox"/> SHRM <input type="checkbox"/>                                                                                                                               | PED <input type="checkbox"/> SHRM <input type="checkbox"/>                            |
| Visual acuity (ETDRS)                                   | (ETDRS letters, range 0-95) <input type="text"/> <input type="text"/>                                                                                                                    | (ETDRS letters, range 0-95) <input type="text"/> <input type="text"/>                 |
| Visual acuity (Snellen)                                 | <input type="text"/> / <input type="text"/> <input type="text"/> <input type="text"/>                                                                                                    | <input type="text"/> / <input type="text"/> <input type="text"/> <input type="text"/> |
| Clinical findings by HES                                | Yes No                                                                                                                                                                                   | Yes No                                                                                |
|                                                         | Macular Haemorrhage <input type="checkbox"/> <input type="checkbox"/>                                                                                                                    | Macular Haemorrhage <input type="checkbox"/> <input type="checkbox"/>                 |
|                                                         | Other Retinal Haemorrhage <input type="checkbox"/> <input type="checkbox"/>                                                                                                              | Other Retinal Haemorrhage <input type="checkbox"/> <input type="checkbox"/>           |
|                                                         | Exudates <input type="checkbox"/> <input type="checkbox"/>                                                                                                                               | Exudates <input type="checkbox"/> <input type="checkbox"/>                            |
|                                                         | Disc Swelling <input type="checkbox"/> <input type="checkbox"/>                                                                                                                          | Disc Swelling <input type="checkbox"/> <input type="checkbox"/>                       |
|                                                         | Macular Atrophy <input type="checkbox"/> <input type="checkbox"/>                                                                                                                        | Macular Atrophy <input type="checkbox"/> <input type="checkbox"/>                     |
|                                                         | Cotton Wool Spot <input type="checkbox"/> <input type="checkbox"/>                                                                                                                       | Cotton Wool Spot <input type="checkbox"/> <input type="checkbox"/>                    |
| Other <input type="checkbox"/> <input type="checkbox"/> | Other <input type="checkbox"/> <input type="checkbox"/>                                                                                                                                  |                                                                                       |
| If other specify                                        |                                                                                                                                                                                          |                                                                                       |
| Diagnosis by HES                                        | Yes No                                                                                                                                                                                   | Yes No                                                                                |
|                                                         | Wet AMD <input type="checkbox"/> <input type="checkbox"/>                                                                                                                                | Wet AMD <input type="checkbox"/> <input type="checkbox"/>                             |
|                                                         | Dry AMD <input type="checkbox"/> <input type="checkbox"/>                                                                                                                                | Dry AMD <input type="checkbox"/> <input type="checkbox"/>                             |
|                                                         | Central Serous Chorioretinopathy <input type="checkbox"/> <input type="checkbox"/>                                                                                                       | Central Serous Chorioretinopathy <input type="checkbox"/> <input type="checkbox"/>    |
|                                                         | Central Retinal Vein Occlusion <input type="checkbox"/> <input type="checkbox"/>                                                                                                         | Central Retinal Vein Occlusion <input type="checkbox"/> <input type="checkbox"/>      |
|                                                         | Branch Retinal Vein Occlusion <input type="checkbox"/> <input type="checkbox"/>                                                                                                          | Branch Retinal Vein Occlusion <input type="checkbox"/> <input type="checkbox"/>       |
|                                                         | Diabetic Macular Oedema <input type="checkbox"/> <input type="checkbox"/>                                                                                                                | Diabetic Macular Oedema <input type="checkbox"/> <input type="checkbox"/>             |
|                                                         | Inherited Eye Disease <input type="checkbox"/> <input type="checkbox"/>                                                                                                                  | Inherited Eye Disease <input type="checkbox"/> <input type="checkbox"/>               |
|                                                         | Other <input type="checkbox"/> <input type="checkbox"/>                                                                                                                                  | Other <input type="checkbox"/> <input type="checkbox"/>                               |
|                                                         | If other specify                                                                                                                                                                         |                                                                                       |

Study No:   -

**HERMES Study**

HES First Visit

Page 2/2

| ALL FIELDS ARE MANDATORY         |                                                                     |                                                                     |
|----------------------------------|---------------------------------------------------------------------|---------------------------------------------------------------------|
| HES Review                       | Right Eye                                                           | Left eye                                                            |
|                                  | Yes No                                                              | Yes No                                                              |
| Additional Diagnostic Procedures | OCT - Angio <input type="checkbox"/> <input type="checkbox"/>       | OCT - Angio <input type="checkbox"/> <input type="checkbox"/>       |
|                                  | IGCA <input type="checkbox"/> <input type="checkbox"/>              | IGCA <input type="checkbox"/> <input type="checkbox"/>              |
|                                  | FA <input type="checkbox"/> <input type="checkbox"/>                | FA <input type="checkbox"/> <input type="checkbox"/>                |
|                                  | Optos <input type="checkbox"/> <input type="checkbox"/>             | Optos <input type="checkbox"/> <input type="checkbox"/>             |
|                                  | Ultrasound B Scan <input type="checkbox"/> <input type="checkbox"/> | Ultrasound B Scan <input type="checkbox"/> <input type="checkbox"/> |
|                                  | Visual Field Test <input type="checkbox"/> <input type="checkbox"/> | Visual Field Test <input type="checkbox"/> <input type="checkbox"/> |
|                                  | Other <input type="checkbox"/> <input type="checkbox"/>             | Other <input type="checkbox"/> <input type="checkbox"/>             |
| If other specify                 |                                                                     |                                                                     |

Comments:

**I have completed this form in full and take full responsibility for any missing data.**

|                                                  |               |                                                                                                                                                                             |
|--------------------------------------------------|---------------|-----------------------------------------------------------------------------------------------------------------------------------------------------------------------------|
| <b>Signed:</b>                                   | <b>Print:</b> | <b>Date:</b>                                                                                                                                                                |
|                                                  |               | <input type="text"/> <input type="text"/> / <input type="text"/> <input type="text"/> / <input type="text"/> <input type="text"/> <input type="text"/> <input type="text"/> |
| <b>Office use only, data entry completed by:</b> |               |                                                                                                                                                                             |
| <b>Signed:</b>                                   | <b>Print:</b> | <b>Date:</b>                                                                                                                                                                |
|                                                  |               | <input type="text"/> <input type="text"/> / <input type="text"/> <input type="text"/> / <input type="text"/> <input type="text"/> <input type="text"/> <input type="text"/> |

Study No:   -   **HERMES Study**  
READING CENTRE

Page 1/2

| ALL FIELDS ARE MANDATORY                    |                                                                                    |                                                                                    |
|---------------------------------------------|------------------------------------------------------------------------------------|------------------------------------------------------------------------------------|
| Reference Standard                          | Right Eye                                                                          | Left eye                                                                           |
| Diagnosis by the reference standard         | Yes No                                                                             | Yes No                                                                             |
|                                             | Wet AMD <input type="checkbox"/> <input type="checkbox"/>                          | Wet AMD <input type="checkbox"/> <input type="checkbox"/>                          |
|                                             | Dry AMD <input type="checkbox"/> <input type="checkbox"/>                          | Dry AMD <input type="checkbox"/> <input type="checkbox"/>                          |
|                                             | Central Serous Chorioretinopathy <input type="checkbox"/> <input type="checkbox"/> | Central Serous Chorioretinopathy <input type="checkbox"/> <input type="checkbox"/> |
|                                             | Central Retinal Vein Occlusion <input type="checkbox"/> <input type="checkbox"/>   | Central Retinal Vein Occlusion <input type="checkbox"/> <input type="checkbox"/>   |
|                                             | Branch Retinal Vein Occlusion <input type="checkbox"/> <input type="checkbox"/>    | Branch Retinal Vein Occlusion <input type="checkbox"/> <input type="checkbox"/>    |
|                                             | Diabetic Macular Oedema <input type="checkbox"/> <input type="checkbox"/>          | Diabetic Macular Oedema <input type="checkbox"/> <input type="checkbox"/>          |
|                                             | Inherited Eye Disease <input type="checkbox"/> <input type="checkbox"/>            | Inherited Eye Disease <input type="checkbox"/> <input type="checkbox"/>            |
|                                             | Other <input type="checkbox"/> <input type="checkbox"/>                            | Other <input type="checkbox"/> <input type="checkbox"/>                            |
|                                             | If other specify                                                                   |                                                                                    |
| Referral decision by reference standard     | Urgent <input type="checkbox"/>                                                    | Routine <input type="checkbox"/> No referral <input type="checkbox"/>              |
| Artificial Intelligence Moorfields DeepMind | Right Eye                                                                          | Left eye                                                                           |
| Deep-Mind Diagnosis of retinal disease      | Yes No                                                                             | Yes No                                                                             |
|                                             | Wet AMD <input type="checkbox"/> <input type="checkbox"/>                          | Wet AMD <input type="checkbox"/> <input type="checkbox"/>                          |
|                                             | Dry AMD <input type="checkbox"/> <input type="checkbox"/>                          | Dry AMD <input type="checkbox"/> <input type="checkbox"/>                          |
|                                             | Central Serous Chorioretinopathy <input type="checkbox"/> <input type="checkbox"/> | Central Serous Chorioretinopathy <input type="checkbox"/> <input type="checkbox"/> |
|                                             | Central Retinal Vein Occlusion <input type="checkbox"/> <input type="checkbox"/>   | Central Retinal Vein Occlusion <input type="checkbox"/> <input type="checkbox"/>   |
|                                             | Branch Retinal Vein Occlusion <input type="checkbox"/> <input type="checkbox"/>    | Branch Retinal Vein Occlusion <input type="checkbox"/> <input type="checkbox"/>    |
|                                             | Diabetic Macular Oedema <input type="checkbox"/> <input type="checkbox"/>          | Diabetic Macular Oedema <input type="checkbox"/> <input type="checkbox"/>          |
|                                             | Inherited Eye Disease <input type="checkbox"/> <input type="checkbox"/>            | Inherited Eye Disease <input type="checkbox"/> <input type="checkbox"/>            |
|                                             | Other <input type="checkbox"/> <input type="checkbox"/>                            | Other <input type="checkbox"/> <input type="checkbox"/>                            |
|                                             | If other specify                                                                   |                                                                                    |
| Referral decision by Moorfields DeepMind    | Urgent <input type="checkbox"/>                                                    | Routine <input type="checkbox"/> No referral <input type="checkbox"/>              |

Study No:   -

**HERMES Study**  
 READING CENTRE

**ALL FIELDS ARE MANDATORY**

|                                                                              |                              |                                                     |
|------------------------------------------------------------------------------|------------------------------|-----------------------------------------------------|
| <b>Artificial Intelligence Moorfields-DeepMind</b>                           |                              |                                                     |
| Time from receiving the OCT scans and a referral decision (hours)            |                              | (hours) <input type="text"/> <input type="text"/>   |
| End-to-end inference speed of technical infrastructure supporting the AI DSS |                              | (minutes) <input type="text"/> <input type="text"/> |
| Any technical issues                                                         | Yes <input type="checkbox"/> | No <input type="checkbox"/>                         |
| If yes, specify details                                                      |                              |                                                     |

Comments:

For peer review only

**I have completed this form in full and take full responsibility for any missing data.**

|                                                  |               |                                                                                                                                                                             |
|--------------------------------------------------|---------------|-----------------------------------------------------------------------------------------------------------------------------------------------------------------------------|
| <b>Signed:</b>                                   | <b>Print:</b> | <b>Date:</b>                                                                                                                                                                |
|                                                  |               | <input type="text"/> <input type="text"/> / <input type="text"/> <input type="text"/> / <input type="text"/> <input type="text"/> <input type="text"/> <input type="text"/> |
| <b>Office use only, data entry completed by:</b> |               |                                                                                                                                                                             |
| <b>Signed:</b>                                   | <b>Print:</b> | <b>Date:</b>                                                                                                                                                                |
|                                                  |               | <input type="text"/> <input type="text"/> / <input type="text"/> <input type="text"/> / <input type="text"/> <input type="text"/> <input type="text"/> <input type="text"/> |

Study No:   -

**HERMES Study**

**APPENDIX 1 – PROTOCOL DEVIATION**

| ALL FIELDS ARE MANDATORY |                                                                                                                                                                                          |
|--------------------------|------------------------------------------------------------------------------------------------------------------------------------------------------------------------------------------|
| <b>Deviation Details</b> |                                                                                                                                                                                          |
| Deviation date           | (dd mm yyyy) <input type="text"/> <input type="text"/> / <input type="text"/> <input type="text"/> / <input type="text"/> <input type="text"/> <input type="text"/> <input type="text"/> |
| Type of deviation        |                                                                                                                                                                                          |
| Any outcomes or actions  |                                                                                                                                                                                          |
| Deviation date           | (dd mm yyyy) <input type="text"/> <input type="text"/> / <input type="text"/> <input type="text"/> / <input type="text"/> <input type="text"/> <input type="text"/> <input type="text"/> |
| Type of deviation        |                                                                                                                                                                                          |
| Any outcomes or actions  |                                                                                                                                                                                          |
| Deviation date           | (dd mm yyyy) <input type="text"/> <input type="text"/> / <input type="text"/> <input type="text"/> / <input type="text"/> <input type="text"/> <input type="text"/> <input type="text"/> |
| Type of deviation        |                                                                                                                                                                                          |
| Any outcomes or actions  |                                                                                                                                                                                          |
| Deviation date           | (dd mm yyyy) <input type="text"/> <input type="text"/> / <input type="text"/> <input type="text"/> / <input type="text"/> <input type="text"/> <input type="text"/> <input type="text"/> |
| Type of deviation        |                                                                                                                                                                                          |
| Any outcomes or actions  |                                                                                                                                                                                          |

**I have completed this form in full and take full responsibility for any missing data.**

|                                                  |               |                                                                                                                                                                             |
|--------------------------------------------------|---------------|-----------------------------------------------------------------------------------------------------------------------------------------------------------------------------|
| <b>Signed:</b>                                   | <b>Print:</b> | <b>Date:</b>                                                                                                                                                                |
|                                                  |               | <input type="text"/> <input type="text"/> / <input type="text"/> <input type="text"/> / <input type="text"/> <input type="text"/> <input type="text"/> <input type="text"/> |
| <b>Office use only, data entry completed by:</b> |               |                                                                                                                                                                             |
| <b>Signed:</b>                                   | <b>Print:</b> | <b>Date:</b>                                                                                                                                                                |
|                                                  |               | <input type="text"/> <input type="text"/> / <input type="text"/> <input type="text"/> / <input type="text"/> <input type="text"/> <input type="text"/> <input type="text"/> |

Study No:   -

**HERMES Study**

**APPENDIX 2 – EARLY STUDY WITHDRAWAL**

| ALL FIELDS ARE MANDATORY                                                                                        |                                                                                                                                                                                          |
|-----------------------------------------------------------------------------------------------------------------|------------------------------------------------------------------------------------------------------------------------------------------------------------------------------------------|
| Withdrawal Details                                                                                              |                                                                                                                                                                                          |
| Did the patients discontinue the trial prematurely for reasons other than being referred back to hospital care? | Yes <input type="checkbox"/> No <input type="checkbox"/>                                                                                                                                 |
| Date of premature Study Discontinuation                                                                         | (dd mm yyyy) <input type="text"/> <input type="text"/> / <input type="text"/> <input type="text"/> / <input type="text"/> <input type="text"/> <input type="text"/> <input type="text"/> |
| Primary reason for discontinuation<br><i>(tick one box only)</i>                                                | Patient withdraws consent <input type="checkbox"/><br><i>If known, state reason:</i>                                                                                                     |
|                                                                                                                 | Patient is non-compliant <input type="checkbox"/>                                                                                                                                        |
|                                                                                                                 | Patient is lost to follow up <input type="checkbox"/>                                                                                                                                    |
|                                                                                                                 | Investigator feels that it is in the patient's best interest due to adverse event <input type="checkbox"/><br><i>Related AE No:</i>                                                      |
|                                                                                                                 | Other reason for discontinuation <input type="checkbox"/><br><i>If Other specify:</i>                                                                                                    |
| Does the patient still agree to have their data collected and analysed as part of intent to treat analysis?     | Yes <input type="checkbox"/> No <input type="checkbox"/>                                                                                                                                 |

**I have completed this form in full and take full responsibility for any missing data.**

| <b>Signed:</b>                            | <b>Print:</b> | <b>Date:</b>                                                                                                                                                                |
|-------------------------------------------|---------------|-----------------------------------------------------------------------------------------------------------------------------------------------------------------------------|
| <br>                                      | <br>          | <input type="text"/> <input type="text"/> / <input type="text"/> <input type="text"/> / <input type="text"/> <input type="text"/> <input type="text"/> <input type="text"/> |
| Office use only, data entry completed by: |               |                                                                                                                                                                             |
| <b>Signed:</b>                            | <b>Print:</b> | <b>Date:</b>                                                                                                                                                                |
| <br>                                      | <br>          | <input type="text"/> <input type="text"/> / <input type="text"/> <input type="text"/> / <input type="text"/> <input type="text"/> <input type="text"/> <input type="text"/> |

## Appendix 6. Trial Documents and Subject Records

### 6.1 CRFs and Source Document Identification

We will establish a hub and spoke structure, where each community optometry practice liaises with its local hospital site (Moorfields Eye Hospital NHS Foundation Trust, Birmingham University Hospitals NHS Foundation Trust, Central Middlesex Hospital at London North West University Healthcare NHS Trust, and North West Anglia NHS Foundation Trust) for the day-to-day operation of the trial, through the site coordinator located at each site. 8-10 optometry practices will be located in the catchment area of Moorfields Eye Hospital NHS Foundation Trust (4-5 control and 4-5 intervention), 4-6 in the catchment area of North West London NHS Foundation Trust (Central Middlesex Hospital) (2-3 control and 2-3 intervention), 4-6 in the catchment area of North West Anglia NHS Foundation Trust (2-3 control and 2-3 intervention) and 4-6 in the catchment area of Birmingham University Hospitals NHS Foundation Trust (2-3 control and 2-3 intervention). All sites, including community optometry and hospital sites transfer data (OCT and clinical data) to Moorfields Reading Centre. The digital referral platform will be used in the 12 intervention optometry practices and the 4 HES; OCTs and clinical data from patients in the intervention optometry practices will be transferred to HES via a digital referral platform for remote review ('tele-HES') by local human experts.

Both the control arm and interventional arm will use the trial database to complete the eCRF and securely upload OCT scans. The interventional arm also transfers OCT's to the patient's hub hospital via a secure tele-ophthalmology platform. The scans and data will then be matched with the relevant trial data in the eCRF database.

For the AI Diagnostic Accuracy study, the pseudonymised OCT scans will be securely transmitted from the Moorfields Reading Centre to a secure Google Cloud Healthcare DICOM store over an encrypted connection, where it will be analysed by the DeepMind algorithm. Results from this analysis will be logged in the eCRF database. The study's use of cloud computing infrastructure adheres to January 2018 guidance from NHS Digital regarding cloud computing for health and social care. All data will be handled in accordance with the Data Protection Act 2018.

### 6.2 Confidentiality of Trial Documents and Subject Records

Identifiable patient data will not be accessed outside the care team without prior consent at any stage of the project. The OCT scans will be pseudoanonymised and no personal data will be included on the scans. No personal identifiers such as the patients name will be sent to the Sponsor and a unique identification code will be assigned to each OCT scan. This log of subject codes will be kept at each research site but not shared with the Sponsor.

The eCRF will not bear the subject's name or other personal identifiable data. A trial number will be used for identification on the CRFs. A separate log file which links the study ID and the patient's details, screening log and recruitment information will be kept on a protected NHS computer at hub sites. The key log will be kept at the recruitment site and will not be shared with the Sponsor. It will be

1  
2  
3 the responsibility of the chief investigator or delegated trial member to ensure the accuracy of all data  
4 recorded on the CRFs. CRFs will be completed and signed off by the Chief Investigator or  
5 delegated/authorised individual as outlined in the delegation log, the completed CRFs will be checked  
6 for accuracy and completion by the trial co-ordinator prior to data entry.  
7  
8

### 9 **6.3 Procedures for validation and securing of electronic clinical data systems**

10  
11 The eCRF will be developed by the Moorfields Eye Hospital database development team. The front end  
12 will use a bespoke web application and the back end (data storage) will be hosted on Moorfields Eye  
13 Hospital Research Database SQL servers. All servers are backed up daily and with multiple restore  
14 points every day and backup copies exist in more than one All MEH clinical trial databases are part of  
15 the MEH disaster recovery strategy and have a 5 day Recovery Time Objective.  
16  
17  
18

### 19 **6.4 Data handling and record keeping**

20  
21 With respect to data handling, the senior data manager in Moorfields Eye Hospital CRF will  
22 independently ask the IT applications team to run missing data query and perform range check, logic  
23 check and data quality checks of the Electronic Database on a monthly basis.  
24  
25

26 Data queries will be sent to trial co-ordinators for clarification and confirmation whenever picked up.  
27 After all data queries are resolved and all errors are corrected, the database will then be locked with  
28 the agreement of King's CTU statistician and data will be exported by the applications manager and  
29 sent to trial statistician for data analysis. Pre-existing mechanisms for data transfer between  
30 Moorfields Eye Hospital CRF and King's CTU will be utilised.  
31  
32  
33

34 Active project data is stored in the dedicated secure Reading Centre drive with appropriate back up  
35 arrangements. Access to the drive is restricted only to Reading Centre staff with permission and  
36 access will be monitored, granted, revoked on a per user basis. This means that only individuals with  
37 prior authorisation can access the data  
38  
39  
40  
41  
42  
43  
44  
45  
46  
47  
48  
49  
50  
51  
52  
53  
54  
55  
56  
57  
58  
59  
60



## Appendix 7. References

- 1 Kortuem K, Fasler K, Charnley A, et al. Implementation of medical retina virtual clinics in a tertiary eye care referral centre. *British Journal of Ophthalmology* 2018;102(10):1391-1395.
- 2 Agresti A and Coull B. Approximate is Better than “Exact” for Interval Estimation of Binomial Proportions. *The American Statistician* 1998;52(2):119-126.
- 3 Day A, Burr J, Bunce C, et al. Randomised, single-masked non-inferiority trial of femtosecond laser-assisted versus manual phacoemulsification cataract surgery for adults with visually significant cataract: the FACT trial protocol. *BMJ Open* 2015;5(11):p.e010381.
- 4 Theodossiades J, Murdoch I, and Cousens S. Glaucoma case finding: a cluster-randomised intervention trial. *Eye* 2004;18(5):483-490.
- 5 De Fauw J, Ledsam J, Romera-Paredes B, et al. Clinically applicable deep learning for diagnosis and referral in retinal disease. *Nature Medicine* 2018;24(9):1342-1350.

# BMJ Open

**Tele-ophthalmology-enabled and Artificial Intelligence-ready referral pathway for community optometry referrals of retinal disease (HERMES): A Cluster Randomised Superiority Trial with a linked Diagnostic Accuracy Study  
HERMES Study Report 1: Study Protocol**

|                                 |                                                                                                                                                                                                                                                                                                                                                                                                                                                                                                                                                                                                                                                                                                                                                                                                                                                                                                                                                                                                                                                                                                                                                                                                                                                                                                                                                                                                                                                                                                                                                                                                                                                                                                                                                                                                                                                    |
|---------------------------------|----------------------------------------------------------------------------------------------------------------------------------------------------------------------------------------------------------------------------------------------------------------------------------------------------------------------------------------------------------------------------------------------------------------------------------------------------------------------------------------------------------------------------------------------------------------------------------------------------------------------------------------------------------------------------------------------------------------------------------------------------------------------------------------------------------------------------------------------------------------------------------------------------------------------------------------------------------------------------------------------------------------------------------------------------------------------------------------------------------------------------------------------------------------------------------------------------------------------------------------------------------------------------------------------------------------------------------------------------------------------------------------------------------------------------------------------------------------------------------------------------------------------------------------------------------------------------------------------------------------------------------------------------------------------------------------------------------------------------------------------------------------------------------------------------------------------------------------------------|
| Journal:                        | <i>BMJ Open</i>                                                                                                                                                                                                                                                                                                                                                                                                                                                                                                                                                                                                                                                                                                                                                                                                                                                                                                                                                                                                                                                                                                                                                                                                                                                                                                                                                                                                                                                                                                                                                                                                                                                                                                                                                                                                                                    |
| Manuscript ID                   | bmjopen-2021-055845.R1                                                                                                                                                                                                                                                                                                                                                                                                                                                                                                                                                                                                                                                                                                                                                                                                                                                                                                                                                                                                                                                                                                                                                                                                                                                                                                                                                                                                                                                                                                                                                                                                                                                                                                                                                                                                                             |
| Article Type:                   | Protocol                                                                                                                                                                                                                                                                                                                                                                                                                                                                                                                                                                                                                                                                                                                                                                                                                                                                                                                                                                                                                                                                                                                                                                                                                                                                                                                                                                                                                                                                                                                                                                                                                                                                                                                                                                                                                                           |
| Date Submitted by the Author:   | 26-Nov-2021                                                                                                                                                                                                                                                                                                                                                                                                                                                                                                                                                                                                                                                                                                                                                                                                                                                                                                                                                                                                                                                                                                                                                                                                                                                                                                                                                                                                                                                                                                                                                                                                                                                                                                                                                                                                                                        |
| Complete List of Authors:       | <p>Han, Ji Eun; University of Birmingham Institute of Inflammation and Ageing,<br/> Liu, Xiaoxuan; University Hospitals Birmingham NHS Foundation Trust, Bunce, Catey; Royal Marsden Hospital NHS Trust, RM CTU<br/> Douiri, Abdel; King's College London, School of Population Health &amp; Environmental Sciences<br/> Vale, Luke; Newcastle University, Health Economics Group, Institute of Health and Society<br/> Blandford, Ann; University College London, UCLIC<br/> Lawrenson, John; City University of London, Division of Optometry and Visual Science<br/> Hussain, Rima; Moorfields Eye Hospital NHS Foundation Trust, NIHR Biomedical Research Centre; UCL, Institute of Ophthalmology<br/> Grimaldi, Gabriela; Moorfields Eye Hospital NHS Foundation Trust, NIHR Biomedical Research Centre; UCL, Institute of Ophthalmology<br/> Learoyd, Anastazia; King's College London, School of Population Health &amp; Environmental Sciences<br/> Kernohan, Ashleigh; Newcastle University, Population Health Sciences Institute<br/> Dinah, Christiana; London North West Healthcare NHS Trust, Ophthalmology<br/> Minos, Evangelos; North West Anglia NHS Foundation Trust<br/> Sim, Dawn; Moorfields Eye Hospital NHS Foundation Trust, Aslam, Tariq; University of Manchester,<br/> Patel, Praveen; Moorfields Eye Hospital NHS Foundation Trust, NIHR Biomedical Research Centre; UCL, Institute of Ophthalmology<br/> Denniston, Alastair; University Hospitals Birmingham NHS Foundation Trust<br/> Keane, Pearse; Moorfields Eye Hospital NHS Foundation Trust; University College London, Institute of Ophthalmology<br/> Balaskas, Konstantinos; Moorfields Eye Hospital NHS Foundation Trust, Moorfields Ophthalmic Reading Centre and Artificial Intelligence Lab; University College London, Institute of Ophthalmology</p> |
| <b>Primary Subject Heading</b>: | Ophthalmology                                                                                                                                                                                                                                                                                                                                                                                                                                                                                                                                                                                                                                                                                                                                                                                                                                                                                                                                                                                                                                                                                                                                                                                                                                                                                                                                                                                                                                                                                                                                                                                                                                                                                                                                                                                                                                      |

1  
2  
3  
4  
5  
6  
7  
8  
9  
10  
11  
12  
13  
14  
15  
16  
17  
18  
19  
20  
21  
22  
23  
24  
25  
26  
27  
28  
29  
30  
31  
32  
33  
34  
35  
36  
37  
38  
39  
40  
41  
42  
43  
44  
45  
46  
47  
48  
49  
50  
51  
52  
53  
54  
55  
56  
57  
58  
59  
60

|                            |                                                                                                                                                            |
|----------------------------|------------------------------------------------------------------------------------------------------------------------------------------------------------|
| Secondary Subject Heading: | Health services research, Health informatics, Health economics, Evidence based practice                                                                    |
| Keywords:                  | OPHTHALMOLOGY, Medical retina < OPTHALMOLOGY, HEALTH SERVICES ADMINISTRATION & MANAGEMENT, HEALTH ECONOMICS, Telemedicine < BIOTECHNOLOGY & BIOINFORMATICS |
|                            |                                                                                                                                                            |

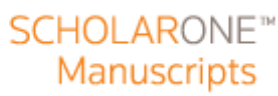

1  
2  
3  
4  
5  
6  
7  
8  
9  
10  
11  
12  
13  
14  
15

# Tele-ophthalmology-enabled and Artificial Intelligence-ready referral pathway for community optometry referrals of retinal disease (HERMES): A Cluster Randomised Superiority Trial with a linked Diagnostic Accuracy Study

16  
17  
18  
19  
20

## HERMES Study Report 1: Study Protocol

21

### Authors

22 Ji Eun Diana Han, Xiaoxuan Liu, Catey Bunce, Abdel Douiri, Luke Vale, Ann Blandford, John  
23 Lawrenson, Rima Hussain, Gabriela Grimaldi, Annastazia E Learoyd, Ashleigh Kernohan, Christiana  
24 Dinah, Evangelos Minos, Dawn Sim, Tariq Aslam, Praveen J Patel, Alastair K Denniston, Pearse A  
25 Keane, Konstantinos Balaskas

26  
27  
28

### Affiliations

29 NIHR Biomedical Research Centre at Moorfields Eye Hospital NHS Foundation Trust and UCL  
30 Institute of Ophthalmology, London. (Pearse A Keane, Praveen J Patel, Dawn Sim, Rima Hussain,  
31 Gabriela Grimaldi)

32 University College London (Pearse Keane, Ann Blandford, Gabriela Grimaldi)

33 King's College London (Abdel Douiri, Annastazia E Learoyd)

34 City, University of London (John Lawrenson)

35 University of Newcastle (Luke Vale, Ashleigh Kernohan)

36 Manchester University NHS Foundation Trust (Tariq Aslam)

37 University Hospitals Birmingham NHS Foundation Trust (Alastair K Denniston, Ji Eun Diana Han,  
38 Xiaoxuan Liu)

39 Central Middlesex Hospital, London North West University Healthcare NHS Trust (Christiana Dinah)

40 North West Anglia NHS Foundation Trust (Evangelos Minos)

41 Royal Marsden NHS Foundation Trust (Catey Bunce)

42  
43  
44

### Corresponding Author:

45 Konstantinos Balaskas

46 Moorfields Ophthalmic Reading Centre and Clinical Artificial Intelligence Lab, NIHR Biomedical  
47 Research Centre at Moorfields Eye Hospital NHS Foundation Trust and UCL Institute of  
48 Ophthalmology

49 162 City Road

50 London

51 EC1V 2PD

52 [k.balaskas@nhs.net](mailto:k.balaskas@nhs.net)

53  
54  
55  
56  
57  
58  
59  
60

**Keywords:** Telemedicine, tele-ophthalmology, artificial intelligence, machine learning, ophthalmology, retinal disease, randomised controlled trial, diagnostic accuracy

1  
2  
3  
4  
5  
6  
7  
8  
9  
10  
11  
12  
13  
14  
15  
16  
17  
18  
19  
20  
21  
22  
23  
24  
25  
26  
27  
28  
29  
30  
31  
32  
33  
34  
35  
36  
37  
38  
39  
40  
41  
42  
43  
44  
45  
46  
47  
48  
49  
50  
51  
52  
53  
54  
55  
56  
57  
58  
59  
60

For peer review only

## ABSTRACT

### *Introduction*

Recent years have witnessed an upsurge of demand in eye care services in the UK. With a large proportion of patients referred to Hospital Eye Services (HES) for diagnostics and disease management, the referral process results in unnecessary referrals from erroneous diagnoses, and delays in access to appropriate treatment. A potential solution is a tele-ophthalmology digital referral pathway linking community optometry and HES.

### *Methods and analysis*

The HERMES study is a cluster randomised clinical trial (C-RCT) for evaluating the effectiveness of a tele-ophthalmology referral pathway between community optometry and HES for retinal diseases. Nested within HERMES is a diagnostic accuracy study, which assesses the accuracy of an artificial intelligence (AI) decision support system (DSS) for automated diagnosis and referral recommendation. A post-implementation, observational sub-study, a within-trial economic evaluation and discrete choice experiment will assess the feasibility of implementation of both digital technologies within a real-life setting. Patients with a suspicion of retinal disease, undergoing eye examination and optical coherence tomography (OCT) scans, will be recruited across 24 optometry practices in the UK. Optometry practices will be randomised to standard care or tele-ophthalmology. The primary outcome is the proportion of false positive referrals (unnecessary HES visits) in the current referral pathway compared to the tele-ophthalmology referral pathway. OCT scans will be interpreted by the AI DSS which provides a diagnosis and referral decision and the primary outcome for the AI diagnostic study is diagnostic accuracy of the referral decision made by the Moorfields-DeepMind AI system. Secondary outcomes relate to inappropriate referral rate, cost-effectiveness analyses and human-computer interaction analyses.

### *Ethics and dissemination*

Ethical approval was obtained from the London - Bromley Research Ethics Committee (REC 20/LO/1299). Findings will be reported through academic journals in ophthalmology, health services research and HCI.

Trial registration number: ISRCTN18106677 (Protocol version 1.1)

## STRENGTHS AND LIMITATIONS OF THIS STUDY

- The HERMES study is a prospective, multi-centre implementation science study assessing clinical utility, cost effectiveness and human-computer interaction of Tele-Medicine and Artificial Intelligence Decision Support Systems in eye care referral pathways.
- The HERMES study incorporates three intertwined implementation science designs for digital eye care: an interventional, cluster randomised controlled trial of tele-medicine, an observational post-implementation study of tele-medicine and a prospective diagnostic accuracy study of Artificial Intelligence decision support systems.
- The study includes an embedded comprehensive economic evaluation, coupled with a Human-Computer Interaction analysis, generating evidence of enablers and barriers to real-life adoption of digital pathways.
- One limitation of the study is that the assessed care pathways pertain to the UK healthcare setting and may not be directly generalisable to other health systems, although reflecting a global trend towards digital transformation of healthcare.

## BACKGROUND

Ophthalmology outpatient attendances account for 10% of all outpatient activity in the United Kingdom (UK), more than any other individual medical specialty.[1, 2] Modern ophthalmic practice in the UK is faced by the challenges of an ageing population, increasing prevalence of degenerative disease, and emergent treatments that are revolutionary but dependent on timely diagnosis. This represents a huge strain on diagnostic services and adversely impacts on timely access to care. Concurrently, there have been exponential increases in computing power and artificial intelligence, expansions in the strength and ubiquity of communications technologies, and developments in imaging capabilities, including in the community optometry setting.[3]

In the UK, primary care for ophthalmology is delivered by community-based optometry practices (High Street opticians). A large proportion of patients diagnosed with a suspicion of retinal disease, including common conditions such as neovascular ('wet') age-related macular degeneration are referred to Hospital Eye Services (HES) for diagnostics and disease management.[4, 5] The referral process results in unnecessary referrals (which can cause inconvenience and distress for patients), erroneous diagnoses, misclassification in terms of urgency, duplication of imaging tests and delays in access to treatment.

An increase of 30% in eye clinic attendances has been observed within the last 5 years throughout the UK.[6] Further increases are likely because of the increasing availability of imaging technology, and especially Optical Coherence Tomography (OCT), which is becoming ubiquitous in community optometry practices.[7] OCT is a non-invasive imaging modality that uses light to generate micrometre-resolution three-dimensional images of the retina and provides the best way to diagnose a number of common retinal pathologies including wet AMD.

This study focuses on two potentially complementary digital technologies that have the potential to revolutionise the interface between community optometrists and hospital-based eye clinics: the tele-ophthalmology platform and the Moorfields-DeepMind Artificial Intelligence Decision Support System (DSS). The technologies will be assessed through two complementary and linked quantitative studies:

1. Cluster Superiority Randomised Trial (RCT) of tele-ophthalmology
2. Prospective diagnostic accuracy study of Artificial Intelligence (Machine Learning) Diagnosis Support (the Moorfields-DeepMind algorithm)

### **1. Cluster Superiority Randomised Trial (RCT) of Tele-ophthalmology Pathway**

Tele-medicine in Ophthalmology can help face this challenge of provision of optimal and expert care to people attending for routine eye tests in community optometry practices, through a digital referral pathway relying on a tele-ophthalmology link between community optometry and HES. This could optimise the referral process by allowing remote review of imaging and clinical data captured at the community level, by human experts based in HES. We will perform a cluster randomised superiority trial to assess the impact on service delivery metrics (such as proportion of unnecessary referrals and time from referral to treatment for urgent maculopathies) of a digital link between community



1  
2  
3 optometry practices and HES using a tele-ophthalmology platform. We will use a device-agnostic,  
4 tele-ophthalmology platform to enable a digital referral pathway of patients with a suspicion of retinal  
5 disease. The pilot data produced by our research team has demonstrated the potential of tele-  
6 ophthalmology to drastically improve the efficiency of the referral pathway between community  
7 optometry and HES while reducing unnecessary referrals to HES[8] and hence we propose a  
8 randomised trial powered to demonstrate superiority of the digital referral pathway against standard  
9 care.  
10  
11  
12

## 13 **2. Diagnostic Accuracy Study of Artificial Intelligence Diagnosis Support System**

14 Artificial Intelligence Decision Support Systems (AI DSS) have recently been developed and shown to  
15 have good diagnostic accuracy against human experts in interpreting ocular imaging tests, such as  
16 OCT scan.[9] The collaboration between Moorfields Eye Hospital and Google DeepMind produced the  
17 arguably most advanced Deep Learning decision support system in Ophthalmology, capable of  
18 interpreting OCT scans, providing diagnosis for retinal disease and suggesting urgency of referral. In  
19 silico analysis using retrospectively collected data has validated the tool against human experts for  
20 the diagnosis of retinal disease and referral recommendations and it has been shown to be non-  
21 inferior.[9] The algorithm is uniquely and independently used in Moorfields Eye Hospital for research  
22 purposes. Thus, while such work has demonstrated promising results, a prospective study is required  
23 to demonstrate its value in practice.  
24  
25  
26  
27  
28  
29

30 We will perform a prospective study to assess diagnostic (referral) accuracy of the Moorfields-  
31 DeepMind AI DSS when applied on the OCT scans collected in the context of the tele-ophthalmology  
32 RCT. This will allow maximum utilisation of collected data from the trial and will provide estimates and  
33 confidence intervals of diagnostic (referral) accuracy. All cases included in the RCT will be reviewed  
34 by the Moorfields-DeepMind AI DSS within 48 hours of obtaining the OCT scans and a referral  
35 decision (refer routinely, refer urgently, don't refer) will be made by the algorithm for each case and  
36 recorded. The referral decisions made by the AI DSS will not be implemented in practice, yet data of  
37 the time required to obtain these decisions and any technical issues encountered with its use will be  
38 captured. These data will be incorporated into the implementation science models, including Human-  
39 Computer Interaction analysis, value-based economic evaluation, and discrete choice experiment, to  
40 identify the potential opportunities and gaps in advancing the adoption of the Moorfields-DeepMind AI  
41 DSS.  
42  
43  
44  
45  
46  
47

## 48 **3. Impact of the Covid-19 pandemic: Post-implementation Observational Pragmatic Sub-Study**

49 NHS services underwent rapid and significant adjustments across the board in response to extreme  
50 challenges presented by the Covid-19 pandemic. Changes to healthcare services driven by necessity  
51 are not always underpinned by a robust evidence base for efficiency and safety. In Ophthalmology, as  
52 a response to the need for social distancing and minimising unnecessary hospital visits, tele-  
53 ophthalmology pathways were commissioned recently in some areas of England using digital link to  
54 facilitate referrals between community optometry and Hospital Eye Services. Greater Manchester was  
55 an early adopter of this approach and a majority of the optometry practices in that area are now  
56 referring to NHS eye units via a tele-ophthalmology link. This local change in standard care provides a  
57  
58  
59  
60

1  
2  
3 unique opportunity to examine whether tele-ophthalmology works under usual conditions within the  
4 NHS. This sub-study will allow us to record and measure variation in quality of health care within a  
5 local region to inform our inferences from the RCT on how the tele-ophthalmology pathway will  
6 perform within a real-life setting. We will thus perform a pragmatic, observational, post-implementation  
7 study involving community optometry practices in the Greater Manchester area. This will also serve  
8 as a safety analysis allowing us to identify potential safety signals of the tele-ophthalmology pathways  
9 and adding granularity to the economic and qualitative evaluations of the RCT.  
10  
11  
12  
13  
14

### 15 *Trial aims and objectives*

16 There are two complementary aims (aims 1&2) pertaining to the linked quantitative studies assessing  
17 the two digital technologies ('tele-ophthalmology' and the 'Moorfields-DeepMind' AI). The qualitative  
18 research element (aim 3) using Human-Computer Interaction (HCI) methodology will run across both  
19 studies to provide evidence on implementation (**Box 1**).  
20  
21  
22  
23  
24  
25  
26  
27  
28  
29  
30  
31  
32  
33  
34  
35  
36  
37  
38  
39  
40  
41  
42  
43  
44  
45  
46  
47  
48  
49  
50  
51  
52  
53  
54  
55  
56  
57  
58  
59  
60

**Box 1. Aims and objectives of the HERMES study**

| Aims                                                                                                                                                                                                                                                                             | Objectives                                                                                                                                                                                                                                                                                                                                                                                                                                                                                                                                                                                                                                                                                                                                                                                                                                                                                                                                                                                                                                                                                                                                                                                                                                                                                                              |
|----------------------------------------------------------------------------------------------------------------------------------------------------------------------------------------------------------------------------------------------------------------------------------|-------------------------------------------------------------------------------------------------------------------------------------------------------------------------------------------------------------------------------------------------------------------------------------------------------------------------------------------------------------------------------------------------------------------------------------------------------------------------------------------------------------------------------------------------------------------------------------------------------------------------------------------------------------------------------------------------------------------------------------------------------------------------------------------------------------------------------------------------------------------------------------------------------------------------------------------------------------------------------------------------------------------------------------------------------------------------------------------------------------------------------------------------------------------------------------------------------------------------------------------------------------------------------------------------------------------------|
| <p>1. To assess the effectiveness and efficiency of a digital referral pathway between community optometry and Hospital Eye Services for referral of retinal disease enabled by a device-agnostic, tele-ophthalmology platform (superiority C-RCT).</p>                          | <ol style="list-style-type: none"> <li>1. Primary Objective: To compare the proportion of referrals classified as unnecessary (cases that can be safely managed without a HES consultation) between current standard care and tele-ophthalmology digital referral pathway.</li> <li>2. Secondary Objectives: <ul style="list-style-type: none"> <li>• To estimate the relative efficiency of the tele-ophthalmology digital pathway compared with standard care in both within trial-based evaluation.</li> <li>• To compare the rate of inappropriate referrals (defined as wrong diagnosis or wrong level of urgency) between standard care and the tele-ophthalmology digital pathway.</li> <li>• To capture the number of uncommon/complex retinal referrals to secondary care and the proportion that can be safely triaged through the tele-ophthalmology platform.</li> <li>• To compare time from referral to review and/or treatment in HES for urgent referrals (such as Wet AMD and Retinal Vein Occlusions) between standard care and tele-ophthalmology digital pathway.</li> <li>• To assess the number of false negatives (number of patients that would have benefited from a HES consultation but were deemed suitable for continued care in the community) (Safety assessment)</li> </ul> </li> </ol> |
| <p>2. To estimate the diagnostic (referral) accuracy and assess the 'real-life' performance of an Artificial Intelligence Decision Support System (the Moorfields-DeepMind AI) in the context of referral pathways between community optometry and HES.</p>                      | <ol style="list-style-type: none"> <li>1. To estimate the diagnostic (referral) accuracy of the Moorfields-DeepMind AI for recommending referral to HES from community optometry practices.</li> <li>2. To estimate the diagnostic accuracy of the Moorfields-DeepMind AI for the diagnosis of retinal disease.</li> <li>3. To assess the cost-effectiveness of the introduction of the DeepMind algorithm in the referral pathway between community optometry and HES.</li> <li>4. To assess the technical feasibility of utilising the Moorfields-DeepMind AI for real-time analysis of retinal OCT scan images.</li> <li>5. To assess real-time operational performance of the Moorfields-DeepMind AI in the tele-ophthalmology referral pathway.</li> </ol>                                                                                                                                                                                                                                                                                                                                                                                                                                                                                                                                                         |
| <p>3. To assess patient and healthcare professional acceptability as well as the barriers and enablers for the adoption of these digital technologies in the context of referral pathways between community optometry and HES through a Human-Computer Interaction approach.</p> | <ol style="list-style-type: none"> <li>1. To understand current workflows and practices of staff and patients in community optometry and HES so as to identify key user requirements for tele-ophthalmology tools from the perspectives of both practitioners and patients (working with care settings with diverse established practices).</li> <li>2. To oversee the deployment of a digital referral platform at selected participating sites to ensure acceptability and acceptance by all user groups, and to understand the adoption process.</li> <li>3. To identify factors that shape professionals' and patients' attitudes to, and trust in, the Moorfields-DeepMind AI, and how</li> </ol>                                                                                                                                                                                                                                                                                                                                                                                                                                                                                                                                                                                                                  |

|                                                                                                                                                                                                                                                                                                                |                                                                                                                                                                                                                                                                                                                                                                                                                                                                                                                                                                                                                                                                                                                                                                                                                                                                                                                                                                                                                        |
|----------------------------------------------------------------------------------------------------------------------------------------------------------------------------------------------------------------------------------------------------------------------------------------------------------------|------------------------------------------------------------------------------------------------------------------------------------------------------------------------------------------------------------------------------------------------------------------------------------------------------------------------------------------------------------------------------------------------------------------------------------------------------------------------------------------------------------------------------------------------------------------------------------------------------------------------------------------------------------------------------------------------------------------------------------------------------------------------------------------------------------------------------------------------------------------------------------------------------------------------------------------------------------------------------------------------------------------------|
|                                                                                                                                                                                                                                                                                                                | <p>to present information in ways that instil appropriate confidence.</p> <p>4. To observe workflows and practices of staff and patients in community optometry practices and HES with already established tele-ophthalmology pathways, aiding identification of technical, logistical and human factors affecting implementation of tele-ophthalmology in real-life (pragmatic sub-study).</p>                                                                                                                                                                                                                                                                                                                                                                                                                                                                                                                                                                                                                        |
| <p>4. To estimate the effectiveness and efficiency of a digital referral pathway between community optometry (High Street Opticians) and the Hospital Eyes Services for referral of retinal diseases enabled by a tele-ophthalmology platform in a real-life, observational post-implementation sub-study.</p> | <p>1. To compare the proportion of referrals classified as unnecessary (cases that can be safely managed without a HES consultation) against Reference Standard and the intervention arm of the RCT.</p> <p>2. To compare the rate of inappropriate referrals (defined as wrong diagnosis or wrong level of urgency) against the Reference Standard and the intervention arm of the RCT.</p> <p>3. To assess the number of false negatives (number of patients that would have benefitted from a HES consultation but were deemed suitable to continued care in the community) (Safety assessment).</p> <p>4. To compare time from referral to review and/or treatment in HES for urgent referrals (such as Wet AMD and Retinal Vein Occlusions) between post-implementation real-life tele-ophthalmology digital pathway and the intervention arm of the RCT.</p> <p>5. To estimate the relative efficiency of the real-life tele-ophthalmology digital pathway compared with the RCT tele-ophthalmology pathway.</p> |

## METHODS AND ANALYSIS

### *Study Design*

#### **Superiority C-RCT of Tele-Ophthalmology Pathway**

An interventional superiority cluster randomised trial (RCT) will be performed comparing standard practice for referral of suspicious retinal disease with tele-ophthalmology between community optometry and HES. This part of the study will be reported according to the CONSORT extension for C-RCTs.[10]

#### **Diagnostic Accuracy Study of Artificial Intelligence Diagnosis Support System**

A prospective study will be conducted using the data of the above RCT to assess the diagnostic (referral) accuracy of an advanced AI DSS (the Moorfields-DeepMind Algorithm) for the automated diagnosis and referral recommendation for retinal disease. OCT scans transferred to the Moorfields Reading Centre in the course of the study will be assessed by the DeepMind algorithm in 'real-time' and its referral recommendations will be recorded and analysed for diagnostic (referral) accuracy and compared against the performance of human experts in the standard care and tele-ophthalmology arms of the RCT. This part of the study will be reported according to the STARD 2015 statement,[11] or STARD-AI.[12] A within-trial based economic evaluation will estimate the efficiency of alternative referral models for retinal disease. A Human-Computer Interaction (HCI) analysis using qualitative methods will assess feasibility of implementation of both digital technologies.

#### **Observational, post-implementations, pragmatic sub-study**

Community Optometry practices in the Greater Manchester area will continue to refer patients with suspicious retinal disease to HES using the locally established tele-ophthalmology digital pathway. Referral recommendations will be compared against a reference standard provided by Moorfields Reading Centre to inform the assessment of real-life effectiveness and efficiency of the tele-ophthalmology referral pathway.

### *Setting*

For the C-RCT and diagnostic accuracy study, patients will be recruited at 24 optometry practices (clusters) in the catchment areas of 4 HES sites: Moorfields Eye Hospital NHS Foundation Trust (8-10 practices), Birmingham University Hospitals NHS Foundation Trust (4-6 practices), Central Middlesex Hospital at London North West University Healthcare NHS Trust (4-6 practices) and North West Anglia NHS Foundation Trust (4-6 practices). 12 clusters (each cluster is an optometry practice) will be randomised to standard care and 12 clusters to the intervention (tele-ophthalmology). This selection of sites includes urban, sub-urban and rural locations within the UK allowing the inferences made from this study to be applicable to more of the UK population. 2 additional optometry practices (clusters) will be randomised (1:1) in a reserve capacity in case of a cluster drop-out or in order to accelerate the recruitment process. (**Appendix 1**)

1  
2  
3 For the pragmatic, observational, post-implementation sub-study, patients will be recruited at 12  
4 optometry practices (clusters) in the catchment area of Manchester University NHS Foundation Trust.  
5 These practices have adopted a tele-ophthalmology referral pathway as standard practices.  
6  
7

8 The enrollment start date is September 2020 with anticipated primary completion date in August  
9 2023. Eligible practices need to have OCT devices and the activity volume and track record of referral  
10 to HES that will allow achieving the per practice recruitment target.  
11

12 All OCT scans and clinical vignettes from each case will be transferred to the Moorfields Reading  
13 Centre that will provide the reference standard (diagnosis and referral recommendation). All suitable  
14 OCT scans will be processed by the DeepMind algorithm at the Moorfields Reading Centre in 'real-  
15 time' for the AI diagnostic accuracy study.  
16  
17  
18

### 19 20 21 *Participants*

22  
23 Adults ( $\geq 18$  years) attending for an eye examination at the participating community optometry  
24 practices who undergo an OCT scan will be considered for participation in the study. Only people with  
25 a suspicion of retinal disease in the opinion of the community optometrist will be recruited in the RCT  
26 and diagnostic accuracy study. As entire optometry practices (clusters) will be randomised into  
27 standard care or tele-ophthalmology, patients who are approached and agree to take part in the study  
28 will consent (**Appendix 2**) to data collection and analysis - there will not be patient-level  
29 randomisation. The patient-level inclusion criteria are outlined in **Box 2**.  
30  
31  
32  
33  
34  
35  
36  
37  
38  
39

#### 40 **Box 2. Patient-level selection criteria**

##### 41 **Inclusion Criteria**

- 42 ○ Able to give consent and understand the study
- 43 ○ Able to cooperate by following study specific instructions
- 44 ○ Adults ( $\geq 18$  years) attending the involved community optometry practices who underwent an  
45 OCT scan
- 46 ○ Individuals who at the opinion of the community optometrist have any suspicion of a retinal  
47 condition (including atrophic ("dry") AMD, wet AMD, diabetic retinopathy, macular oedema,  
48 macular holes, epiretinal membranes, central serous chorio-retinopathy, genetic eye  
49 disease)
- 50 ○ Macular OCT scan performed at community optometry
- 51
- 52
- 53

##### 54 **Exclusion Criteria**

- 55 ○ Individuals with any non-retinal ocular co-morbidities in either eye other than cataract
- 56 ○ Individuals with media opacities, inability to position or fixate or any other reason that  
57 prevents acquisition of good quality OCT scans (at the discretion of the community  
58 optometrist)
- 59
- 60

### *Allocation to trial groups*

Simple randomisation will be performed for involved optometry practices into the intervention and control arms. Randomisation will be performed with the unit of allocation being the cluster rather than the individual and allocation concealment will be at the cluster level. Optometry practices will be randomised 1:1 to standard care or tele-ophthalmology stratified by the hospital site. Optometry practices are committed to the allocated study arm for the duration of the recruitment period or until they have recruited the minimum of the per cluster recruitment range (10 patients).

### **Superiority C-RCT of Tele-Ophthalmology Pathway**

Community optometry practices will be randomised to either continue with standard care for referral of retinal disease to hospital-based eye clinics or move to the tele-ophthalmology digital referral pathway (Figure 1).

**Intervention arm for Superiority C-RCT: Digital Pathway** The intervention pathway is the tele-ophthalmology model for referral of patients with suspicion of retinal disease from community optometry to HES using a digital referral platform. Patients who attend at participating community optometry practices will undergo a clinical assessment and OCT scan.

### ***Figure 1. Superiority cluster randomised trial arms.***

Participants' OCT scan and clinical information will be transferred via the digital referral platform to corresponding HES. In each case, human expert clinicians based in HES (ophthalmologists or specialist optometrists with a minimum of two years' experience of independent practice in the context of HES retinal clinics) will make a referral decision remotely ('tele-HES') after review of OCT scan and clinical information on the digital referral platform. A referral recommendation by the community optometrist will also be recorded but not acted upon, to measure the proportion of correct/incorrect referrals in each arm. (**Appendix 3**).

The remote review of OCT scans and clinical data at 'tele-HES' will be performed by expert clinicians (medics or specialist optometrists) experienced in retinal clinics (minimum of two years' experience of independent practice in the context of retinal clinics in HES) based at Moorfields Eye Hospital, Central Middlesex Hospital, North West Anglia NHS Foundation Trust Hospitals or Queen Elizabeth Hospital Birmingham with access to senior advice by Consultant Ophthalmologists specialising in retinal disease.

### **Control arm for Superiority C-RCT: Standard Practice**

The control pathway is standard practice for referral of patients with suspicion of retinal disease from community optometry to HES. Patients who attend a participating community optometry practice will undergo a clinical assessment and OCT scan. Patients with a suspicion of any retinal disease in the opinion of the community optometrist will be included in the study and will receive a referral decision (refer urgently to HES; refer routinely to HES; don't refer to HES) by the community optometrist. All OCT scans and a clinical vignette from each case will be transferred to the Moorfields Reading Centre that will provide the reference standard for referral recommendations.

### Diagnostic Accuracy Study

All referred and non-referred cases (from the standard care and tele-ophthalmology arm above; **Figure 2**) will be included in the AI diagnostic study. All suitable OCT scans will be transferred prospectively on a weekly basis to the Moorfields Ophthalmic Reading Centre. OCT scans will be processed by the Moorfields-DeepMind AI system and end-to-end timing of the process will be captured for each case. For each case the Moorfields-DeepMind AI will provide a:

1. Diagnosis
2. Decision to refer or not
3. Urgency of referral (routine or urgent)

### **Figure 2. Diagnostic accuracy study arms.**

#### *Safety Net*

In cases where 'tele-HES' decision is 'don't refer', the patient will be provided with additional information and alerts for clinical symptoms that should prompt a visit directly to the A&E department of the corresponding secondary care site (Moorfields Eye Hospital, Central Middlesex Hospital, North West Anglia NHS Foundation Trust Hospitals or Queen Elizabeth Hospital Birmingham). Additionally, in cases where a disagreement is found between the decision by the community optometrist and the one made in 'tele-HES', patients will be offered a follow-up appointment at the community optometry practice within 4 weeks.

#### *Reference Standard*

OCT scans from the standard care and tele-ophthalmology arms will be transferred to the Moorfields Ophthalmic Reading Centre. The reference standard will be provided by the expert Ophthalmic Reading Centre for the C-RCT, diagnostic accuracy study, and the Pragmatic sub-study. The reference standard will be the referral decisions and disease diagnosis made at the Reading Centre on the basis of review of images and clinical history and will apply to the RCT, the AI Diagnostic Accuracy study and the Post-implementation, Pragmatic sub-study. Specifically, for each patient, the OCT scan (including b-scans and colour fundus image) and a clinical vignette including visual acuity, age, symptoms, ocular and systemic history will be reviewed by two expert graders. The process to be followed is double-grading with adjudication by a senior retinal specialist at the Moorfields Reading Centre.



## Outcome Measures

The outcomes for the superiority C-RCT and diagnostic accuracy study are outlined in **Box 3**.

### Box 3. Study outcomes

| Superiority C-RCT                                                                                                                                                                                                                                                                                                                                                                                                                                                                                                                                                                                                                                                                                                                                                                                                                                         | Diagnostic Accuracy Study                                                                                                                                                                                                                                                                                                                                                                                                                                                                                                                                                                                                                                                                                                                                                                             | Pragmatic Sub Study                                                                                                                                                                                                                                                                                                                                                                                                                                                                                                                                                                                                                                                                                                                                                 |
|-----------------------------------------------------------------------------------------------------------------------------------------------------------------------------------------------------------------------------------------------------------------------------------------------------------------------------------------------------------------------------------------------------------------------------------------------------------------------------------------------------------------------------------------------------------------------------------------------------------------------------------------------------------------------------------------------------------------------------------------------------------------------------------------------------------------------------------------------------------|-------------------------------------------------------------------------------------------------------------------------------------------------------------------------------------------------------------------------------------------------------------------------------------------------------------------------------------------------------------------------------------------------------------------------------------------------------------------------------------------------------------------------------------------------------------------------------------------------------------------------------------------------------------------------------------------------------------------------------------------------------------------------------------------------------|---------------------------------------------------------------------------------------------------------------------------------------------------------------------------------------------------------------------------------------------------------------------------------------------------------------------------------------------------------------------------------------------------------------------------------------------------------------------------------------------------------------------------------------------------------------------------------------------------------------------------------------------------------------------------------------------------------------------------------------------------------------------|
| Primary Outcome C-RCT:<br>Proportion of false positive referrals in the current referral pathway and the tele-ophthalmology referral pathway.                                                                                                                                                                                                                                                                                                                                                                                                                                                                                                                                                                                                                                                                                                             | Primary outcome diagnostic accuracy study:<br>Diagnostic accuracy of the referral decision made by the Moorfields-DeepMind AI (refer to HES, do not refer to HES) against the Reference Standard (Moorfields Reading Centre).                                                                                                                                                                                                                                                                                                                                                                                                                                                                                                                                                                         |                                                                                                                                                                                                                                                                                                                                                                                                                                                                                                                                                                                                                                                                                                                                                                     |
| Secondary outcomes C-RCT:<br><ol style="list-style-type: none"> <li>1. Proportion of wrong diagnosis and wrong referral urgency in standard and tele-ophthalmology pathways against the reference standard</li> <li>2. Proportion of false negative referrals, as well as sensitivity and specificity in standard and tele-ophthalmology pathways against the reference standard</li> <li>3. Time from referral to consultation for urgent and routine referrals in standard and tele-ophthalmology pathways</li> <li>4. Time from referral to treatment for urgent maculopathies in standard and tele-ophthalmology pathways</li> <li>5. Number of uncommon referrals (rare disease) that can be safely triaged in the tele-ophthalmology pathway</li> <li>6. Within trial cost-effectiveness and cost-consequences of the tele-ophthalmology</li> </ol> | Secondary outcomes diagnostic accuracy study:<br><ol style="list-style-type: none"> <li>1. Sensitivity and specificity of Moorfields-DeepMind AI for the diagnosis of retinal disease</li> <li>2. Sensitivity and specificity of Moorfields-DeepMind AI for referral urgency</li> <li>3. Proportion of false positive referrals in the standard and tele-ophthalmology pathways when human assessors are replaced by the AI DSS</li> <li>4. Proportion of wrong diagnosis and wrong referral urgency in the standard and tele-ophthalmology pathways when human assessors are replaced by AI DSS</li> <li>5. Uptime and end-to-end inference speed of technical infrastructure supporting the AI DSS</li> <li>6. Average time of end-to-end output (referral recommendation) by the AI DSS</li> </ol> | Secondary outcomes of pragmatic sub study:<br><ol style="list-style-type: none"> <li>1. Proportion of false positive referrals in the tele-ophthalmology referral pathway against the Reference Standard and the intervention arm in the main RCT.</li> <li>2. Proportion of wrong diagnosis and wrong referral urgency in the tele-ophthalmology pathway compared against the Reference Standard and the intervention arm in the main RCT study</li> <li>3. Proportion of false negative referrals compared against the Reference Standard and the intervention arm in the main RCT study</li> <li>4. Time from referral to review and/or treatment in HES for urgent referral) in the post-implementation real-life tele-ophthalmology digital pathway</li> </ol> |

|                                                                                                                                                            |                                                                                     |  |
|------------------------------------------------------------------------------------------------------------------------------------------------------------|-------------------------------------------------------------------------------------|--|
| <p>digital pathway compared with standard care</p> <p>7. Modelled cost-consequences and net benefits of alternative diagnostic and referral strategies</p> | <p>7. Cost-consequences and net benefits of AI-enabled digital referral pathway</p> |  |
|------------------------------------------------------------------------------------------------------------------------------------------------------------|-------------------------------------------------------------------------------------|--|

### *Patient and Public Involvement*

Patient and public members were consulted prior to the trial protocol design on perception of tele-ophthalmology and issues of data privacy, impersonal care, trust in the technology, confidence in the quality of care provided through digital means were explored. A patient and public involvement group based at Moorfields Eye Hospital was consulted during the trial design to advise on barriers to recruitment, issues around geographical spread of study sites and patient information material. After study commencement, the PPI group is planned to meet yearly and an end-of-study debrief is planned with all PPI contributors, which will include discussions of the prioritisation and dissemination of study results both to the public as well as relevant healthcare professionals.

## DATA ANALYSIS PLAN

### *Statistical Analysis*

In the Superiority C-RCT of tele-ophthalmology pathway study, the primary analysis will be conducted following an intention-to-treat principle where all randomised patients are analysed in their allocated group whether or not they receive their randomised management plan. The primary outcome is the proportion of false referrals, measured at the patient level. This will be compared between management groups using logistic regression adjusting for clustered centres. Outcomes will be reported as adjusted odds ratios.

In the AI diagnostic accuracy study, we will report estimates of sensitivity and specificity of the DeepMind algorithm for referral decisions with 95% confidence intervals. Our primary analysis will combine urgent and standard referral to HES and compare against no referral to HES but a sensitivity analysis will be conducted to evaluate urgent referrals. The full statistical consideration and analysis is provided in **Appendix 4**.

### *Implementation Science Study Components*

#### **Focus of Analysis**

The primary focus for analysis will be on facilitators and barriers to implementation of the tele-ophthalmology system and the introduction of Artificial Intelligence Decision Support across clinical contexts, along with accounts of how it changes workflow and patient experience. Evaluation will be formative, so as to inform future implementations and also to contextualise the analyses of clinical effectiveness and cost effectiveness. For the AI DSS, questions to be included in interviews will involve whether the AI is to be used as decision aid (e.g., as a filter for disease/no disease) or as a completely independent decision making tool, issues around trust in the technology, perceptions of medicolegal concerns (who is responsible for the decisions?), the optimal place in the care pathway for positioning the AI (high street optician or hospital-based eye services or both), concerns such as de-skilling of practitioners (as diagnostic decisions may be devolved to AI), reduced employment opportunities, the need for a 'safety net'/quality check to oversee and 'sanity check' the performance of the AI system, and impersonal care for patients, and perceived benefits such as more efficient and appropriate care, greater confidence in the process, etc. We will also particularly focus on the question of 'interpretability' of AI DSS and the 'black box' phenomenon and whether it influences trust and potential uptake of this technology. The 'interpretability' of AI DSS is a major factor in technology uptake and may influence the direction of AI DSS developers towards more interpretable technologies.

The data collected from sites with established tele-ophthalmology pathways (Greater Manchester) will be particularly valuable for identifying barriers to implementation in a real-life context that wouldn't be picked up in the controlled environment of the RCT such as technical, staffing, training and human factors. Such barriers can be consequential with respect to patient safety as they have the potential to lead to delays in clinical review or missed cases and therefore the post-implementation sub-study

1  
2  
3 offers an opportunity to explore potential safety signals of the tele-ophthalmology pathways not  
4 typically observable in the context of RCT trials.  
5

### 6 **Human-Computer Interaction (HCI) Analysis**

7  
8 As noted above, the aims of the HCI analyses are to assess the barriers and enablers for the  
9 adoption of the proposed digital technologies in the context of referral pathways between community  
10 optometry and HES through a Human-Computer Interaction approach.  
11

12 In order to capture patient and staff perspectives of tele-ophthalmology models of care as well as AI  
13 DSS, we will take a qualitative approach, conducting interviews and observations in both community  
14 optometry and HES. A full account on sampling, recruitment and analysis methods is provided in  
15 **Appendix 1**. We will compare people's expectations (what they believe they will want and use) with  
16 their experiences when they have access to the relevant technology. In order to compare  
17 expectations against experiences, we will gather data in a variety of settings over the course of the  
18 project:  
19  
20  
21  
22

- 23 ● *In the first six months* of the project, the focus will be on understanding the adoption process  
24 and factors that contribute to success in adoption. Longitudinal data will be gathered at three  
25 selected sites: two optometry practices and the Birmingham HES. Data gathering will focus  
26 on expectations and current work practices before implementation; barriers, facilitators and  
27 experiences during implementation; and perceptions and practices post-implementation.  
28
- 29 ● *Over the subsequent 12 months* (months 7-18), similar data gathering and analysis methods  
30 will be adopted in two optometry practices that are already experienced in using tele-  
31 ophthalmology (sites that have already adopted tele-ophthalmology in the Greater  
32 Manchester area); two practices that are not using tele-ophthalmology and have no  
33 immediate plans to transition (control sites for the quantitative studies described above); and  
34 a second HES (Moorfields Eye Hospital). The focus will be on understanding workflows,  
35 practices and user requirements, including facilitators and barriers to adoption; and identifying  
36 factors that shape attitudes to the AI DSS, and how to present information to instill  
37 appropriate confidence.  
38  
39  
40  
41  
42  
43  
44  
45

### 46 **Economic Analysis**

#### 47 **Cost-Consequence Analysis**

48 The economic evaluation will comprise a within trial cost-consequence analysis (CCA) directly  
49 comparing the tele-ophthalmology pathway with the current referral pathway. This analysis highlights  
50 the choices and trade-offs between the modalities of care provision without an explicit synthesis of data  
51 into a single measure of efficiency. The results for the cost-consequence analysis will be presented as  
52 a balance sheet, which will include point estimates and appropriate measures of variance. From an  
53 NHS perspective, costs such as hospital visits, medications and community GP visits will be costed.  
54 Unit costs for resource use will be derived from published sources e.g. NHS Reference Costs and Unit  
55 Costs of Health and Social Care.[13] When considering the addition of the community optometry  
56  
57  
58  
59  
60

1  
2  
3 perspective, the costs to purchase and maintain an OCT scanner will be considered. The costs of  
4 acquisition will be derived from market prices and converted into a cost per patient using standard  
5 economic methodology.[14] In addition to this, the costs of the Moorfields-DeepMind algorithm will be  
6 considered within trial analysis. We will base this cost on advice from the algorithm owners as well as  
7 consideration of analogous algorithms. We expect there to be considerable uncertainty around the price  
8 to the NHS as a market price is not available. Therefore, we will explore the impact on efficiency of a  
9 range of prices. This will help decision-makers consider the maximum price they might be willing to pay  
10 for this algorithm given the benefits it may provide. In addition to the costs of running the algorithm in  
11 terms of hardware, software and staff, required will be considered. This will be based upon its use within  
12 the study and advice from members of the study. A sensitivity analysis will be carried out to explore  
13 how the adoption of different perspectives (i.e. who is bearing the costs) will affect the cost effectiveness  
14 of the intervention. Outcomes which may be included in this CCA are; false positives, false negatives,  
15 unnecessary hospital visits and duration of the time spent with an untreated macular disorder. These  
16 will be compared to the costs of provision and of the intervention and with the results of the Discrete  
17 Choice Experiment (DCE) described below. Costs that will be included will be those that fall on the NHS  
18 and community optometry practices. Deterministic sensitivity analysis e.g. variations in unit costs, will  
19 also be conducted. The consequences for each of the comparators will be based upon a further  
20 consideration of outcomes (for example necessary referrals missed, correct referrals, individuals  
21 correctly not referred). The likelihood of these different outcomes (given as percentages) will be  
22 described.

23  
24 To include insights derived from the pragmatic post-implementation study, the economic evaluation will  
25 also provide the following additional elements:

- 26 1. The Manchester sub-study group will inform estimates of the cost of the intervention, as  
27 delivered in a 'real world' application which may be more realistic than those estimated from a  
28 trial setting.
- 29 2. The Manchester sub-study group will be used to inform an exploratory analysis. In this the  
30 costs and consequences of the real life sub-study group will be compared to the results from  
31 the trial group to identify if there is any meaningful difference between the two sets of data  
32 and identify what the driving factors are. As a safety analysis will be carried out as part of a  
33 sub-study, the cost and consequences of any unexpected adverse events that are recorded  
34 will be included in the cost consequence analysis. If any safety events become apparent  
35 during the design of the Discrete Choice Experiment then these may be used as the basis of  
36 different attributes and levels in the study design.

### 37 38 39 40 41 42 43 44 45 46 47 48 49 50 51 52 53 **Discrete Choice Experiment (DCE)**

54 In addition to the CCA economic evaluation a Discrete Choice Experiment (DCE) will be carried out to  
55 assess preferences of the general public about the tele-ophthalmology pathway. A DCE is an attribute-  
56 based survey method for measuring benefits. It offers participants at least two alternative choices which  
57 vary across several attributes of interest. These can include several attributes of how the intervention  
58 is provided and its effect on health and other outcomes. Each of these attributes can vary over a range  
59  
60

1  
2  
3 of levels. The choice of DCE attributes for this intervention will be informed from existing literature on  
4 macular disease and provision of eye care service. The output of the qualitative study will also be  
5 examined for any attributes which could affect the preferences of the users of the service. The DCE will  
6 also be used to value in monetary terms the relative importance of the different consequences included  
7 in the CCA. To do this it will use methods previously successfully used in other NIHR funded  
8 studies.[15, 16] The results of this monetary value will be used to inform a further cost benefit analysis.  
9  
10  
11

### 12 **Cost Benefit Analysis**

13 The results of the DCE will be used to value the outcomes described in the cost-consequence analysis.  
14 Outcomes will be expressed as a net monetary benefit by combining the differences in each outcome  
15 by the willingness to pay for a unit change in that outcome. These values are known as willingness to  
16 pay (WTP) values and will be derived from the DCE described above. Cost will be included as part of  
17 the attributes that participants choose between so that participants can express their WTP values for a  
18 described outcome. The cost of the providing the outcome will be derived from the unit costs described  
19 earlier. A net benefit in monetary terms for these outcomes will be derived by subtracting the cost of  
20 the outcome from the WTP value (including a negative net benefit).  
21  
22  
23  
24

25 The values for the cost attribute will be based on pilot work and reviews of prior studies in this area for  
26 example Burr et al. (2012) valued an intervention to monitor ocular hypertension to prevent glaucoma  
27 using a DCE. The range of values was between £15-70 (GBP 2012). Similarly, Shih et al. (2007)  
28 assessed the WTP for a diabetic retinopathy screening service and reported a narrower range of  
29 between \$4-\$24 (USD 2007).[17] After the attributes have been established then the piloting stages will  
30 occur. A survey company will be utilised to gain a large enough sample (www.researchnow.co.uk). The  
31 participants will be offered a small incentive (£1-£2) to complete the survey. The overall sample will be  
32 representative as closely as possible for factors such as age, sex and ethnic background for the UK  
33 population. Optimal sample size requirements for the limited dependent variable models estimated in  
34 DCEs depend on knowledge of the true choice probabilities, which are not known prior to undertaking  
35 this research. However, previous DCE studies have shown that robust choice models can be estimated  
36 from sample sizes between 50-100 respondents. As such, a small pilot sample of 100 participants will  
37 be used as a sample to monitor the rate of completion and to carry out preliminary analysis and change  
38 any parts of the survey that are necessary. After the preliminary analysis is carried out, then a further  
39 sample of 300 participants will be surveyed which will be sample size comparable to other HTAs in this  
40 area. The results of the DCE will be analysed using conditional logit regression analysis, which will  
41 measure the direction and strength of the participant preferences. Sub-group analysis will also be  
42 carried out to see if factors such as age, sex or ethnic background have any effect on the resulting  
43 preferences. Probabilistic and deterministic sensitivity analyses will be carried out to vary parameter  
44 uncertainty for both the costs and the effects. Results of the probabilistic sensitivity analysis will be  
45 presented as point estimates of net-benefits, plots of costs and benefits net benefit curves, which show  
46 the likelihood of each intervention being most likely to have the highest net benefit.  
47  
48  
49  
50  
51  
52  
53  
54  
55  
56  
57  
58  
59  
60

### *Dissemination of Results*

Findings will be reported through academic journals in ophthalmology, health services research and HCI; some will focus on findings from the HCI studies, and some will relate findings to those of the parallel studies covering other themes. PPI workshops will be organised in Birmingham and London before the main study period, with a focus on designing the study adapting the model from an earlier project (the “before” study is reported by Furniss et al., 2016).[18]

## **ETHICS AND DISSEMINATION**

The research project will adhere to the UK Framework for Health and Social Care research. Ethics approval has been obtained for this project. No particular challenges are expected given the low risk nature of the intervention of the RCT, the safety net arrangements for cases not referred to HES from community optometry, the observational design of the AI diagnostic accuracy study, and the relatively low personal sensitivity of the topics to be investigated in the HCI studies.

With respect to confidentiality of patient records and case report forms (CRF; Appendix 5), identifiable patient data will not be accessed outside the care team without prior consent at any stage of the project. The OCT scans will be pseudoanonymised and no personal data will be included on the scans. No personal identifiers such as the patients name will be sent to the Sponsor and a unique identification code will be assigned to each OCT scan. This log of subject codes will be kept at each research site but not shared with the Sponsor. Regarding data handling, the senior data manager in Moorfields Eye Hospital CRF will independently ask the IT applications team to run missing data query and perform range check, logic check and data quality checks of the Electronic Database on a monthly basis. Active project data is stored in the dedicated secure Reading Centre drive with appropriate back up arrangements. Access to the drive is restricted only to Reading Centre staff with permission and access will be monitored, granted, revoked on a per user basis. This means that only individuals with prior authorisation can access the data. Further details on the handling of trial documents and subject records are found in Appendix 6.

Planned outputs:

- High-impact peer-reviewed publications in Ophthalmology and Health Service Research journals
- Presentations in conferences, including the Royal College of Ophthalmologists, the Association for Research in Vision and Ophthalmology, the American Academy of Ophthalmology conference, The College of Optometrists
- The output of this program has the potential to influence the healthcare landscape for eye care by validating digital care pathways for patients with retinal disease. The outcomes of this research will be communicated to NHS England and NHSx to inform policy on the role of digital technologies, including tele-medicine and AI DSS.

The Research team and the Sponsor will actively approach and engage key parties such as the

College of Optometrists, stakeholders in community optometry and Clinical Commissioning Groups.

A detailed engagement plan will be formulated to disseminate the results of this research in order to inform policy decisions for optimising patient care.

## AUTHORS' CONTRIBUTIONS

Ji Eun Diana Han and Xiaoxuan Liu collected methodological data and drafted the manuscript

Catey Bunce, Abdel Douiri and Annastazia E Learoyd provided intellectual input in study methodology and statistical analysis planning and critical review of the manuscript

Luke Vale and Ashleigh Kernohan provided intellectual input in study methodology and economic evaluation planning and critical review of the manuscript

Ann Blandford provided intellectual input in study methodology and human-computer interaction analysis planning and critical review of the manuscript

John Lawrenson, Rima Hussain, Gabriela Grimaldi, Christiana Dinah, Evangelos Minos, Dawn Sim, Tariq Aslam, Praveen J Patel, Alastair K Denniston, Pearse A Keane provided intellectual input in study methodology and design, contributed to drafting and critical review of the manuscript

Konstantinos Balaskas conceived the study, initiated the project, provided intellectual input in study methodology and design and critical review of the manuscript

## FUNDING

The project is funded by an NIHR Health Technology Assessment grant (HTA - Project: 18/182 HTA Digital Technologies to Improve Health and Care).

## ACKNOWLEDGMENT

The HERMES Research Team members would wish to extend their gratitude to the members of the HERMES Trial Advisory Committees for their expert advice and guidance and their valuable contribution to study planning and delivery.

### **Trial Steering Committee:**

Chair: Professor Richard Gale, York University Hospitals NHS Foundation Trust

### Members:

Professor Irene Stratton, Gloucestershire Hospitals NHS Foundation Trust

Dr Bushra Mushtaq, Sandwell and West Birmingham NHS Foundation Trust

Dr Gabriella De Salvo, Southampton University Hospitals NHS Foundation Trust

Mrs Geraldine Hoad, the Macular Society



### Data Monitoring Committee:

Chair: Dr Louise Downey, Hull University Teaching Hospitals NHS Foundation Trust

Members:

Dr Gabriela Czanner, Liverpool John Moores University

Dr Markus Groppe, Buckinghamshire Healthcare NHS Trust

### Competing Interests Statement

Dr Pearse A Keane has previously been consultant for Google DeepMind

### REFERENCES

- 1 The Royal College of Ophthalmologists, 2021. *The Way Forward*. [online] Rcopth.ac.uk. Available at: <<https://www.rcophth.ac.uk/wp-content/uploads/2015/10/RCOphth-The-Way-Forward-Executive-Summary-300117.pdf>> [Accessed 9 June 2021].
- 2 NHS Digital. 2020. *Hospital Outpatient Activity 2019-20: Main Specialty*. [online] Available at: <<https://digital.nhs.uk/data-and-information/publications/statistical/hospital-outpatient-activity/2019-20>> [Accessed 9 June 2021].
- 3 Dabasia P, Edgar D, Garway-Heath D, et al. A survey of current and anticipated use of standard and specialist equipment by UK optometrists. *Ophthalmic and Physiological Optics* 2014;34(5):592-613.
- 4 Looker H, Nyangoma S, Cromie D, et al. Rates of referable eye disease in the Scottish National Diabetic Retinopathy Screening Programme. *British Journal of Ophthalmology* 2014;98(6):790-795.
- 5 Konstantakopoulou E, Harper R, Edgar D, et al. Clinical safety of a minor eye conditions scheme in England delivered by community optometrists. *BMJ Open Ophthalmology* 2018;3(1):p.e000125.
- 6 MacEwen C. 2016. *Increasing demand on hospital eye services risks patients losing vision - The Royal College of Ophthalmologists*. [online] The Royal College of Ophthalmologists. Available at: <<https://www.rcophth.ac.uk/2016/03/increasing-demand-on-hospital-eye-services-risks-patients-losing-vision/>> [Accessed 9 June 2021].
- 7 McCormick E. 2017. *OCT rollout in every Specsavers announced*. [online] Aop.org.uk. Available at: <<https://www.aop.org.uk/ot/industry/high-street/2017/05/22/oct-rollout-in-every-specsavers-announced>> [Accessed 9 June 2021].

- 1
  - 2
  - 3
  - 4
  - 5
  - 6
  - 7
  - 8
  - 9
  - 10
  - 11
  - 12
  - 13
  - 14
  - 15
  - 16
  - 17
  - 18
  - 19
  - 20
  - 21
  - 22
  - 23
  - 24
  - 25
  - 26
  - 27
  - 28
  - 29
  - 30
  - 31
  - 32
  - 33
  - 34
  - 35
  - 36
  - 37
  - 38
  - 39
  - 40
  - 41
  - 42
  - 43
  - 44
  - 45
  - 46
  - 47
  - 48
  - 49
  - 50
  - 51
  - 52
  - 53
  - 54
  - 55
  - 56
  - 57
  - 58
  - 59
  - 60
- 8 Kortuem K, Fasler K, Charnley A, et al. Implementation of medical retina virtual clinics in a tertiary eye care referral centre. *British Journal of Ophthalmology* 2018;102(10):1391-1395.
- 9 De Fauw J, Ledsam J, Romera-Paredes B, et al. Clinically applicable deep learning for diagnosis and referral in retinal disease. *Nature Medicine* 2018;24(9):1342-1350.
- 10 Campbell M, Piaggio G, Elbourne D, et al. Consort 2010 statement: extension to cluster randomised trials. *BMJ* 2012;345(sep04 1):pp.e5661-e5661.
- 11 Bossuyt P, Reitsma J, Bruns D, et al. STARD 2015: an updated list of essential items for reporting diagnostic accuracy studies. *BMJ* 2015:p.h5527.
- 12 Sounderajah V, Ashrafian H, Aggarwal R, et al. Developing specific reporting guidelines for diagnostic accuracy studies assessing AI interventions: The STARD-AI Steering Group. *Nature Medicine* 2020;26(6):807-808.
- 13 Curtis L and Burns A. *Unit Costs of Health and Social Care 2019*. Canterbury: Personal Social Services Research Unit, University of Kent 2019:p.176.
- 14 Drummond M. *Methods for the economic evaluation of health care programmes*. Oxford: Oxford University Press 2005.
- 15 Burr J, Botello-Pinzon P, Takwoingi Y, et al. Surveillance for ocular hypertension: an evidence synthesis and economic evaluation. *Health Technology Assessment* 2012;16(29).
- 16 McCormack K, Wake B, Perez J, et al. Laparoscopic surgery for inguinal hernia repair: systematic review of effectiveness and economic evaluation. *Health Technology Assessment* 2005;9(14).
- 17 Shih H, Chou P, Chen S, et al. A Community-based Study of the Willingness to Pay Associated with Screening for Diabetic Retinopathy among Type 2 Diabetes in Kinmen, Taiwan. *Journal of Epidemiology* 2007;17(6):186-193.
- 18 Furniss D, Iacovides I, Lyons I, et al. Patient and public involvement in patient safety research: a workshop to review patient information, minimise psychological risk and inform research. *Research Involvement and Engagement* 2016;2(1).

# CONSORT Tele-Ophthalmology Superiority Cluster Randomised Trial

1  
2  
3  
4  
5  
6  
7  
8  
9  
10  
11  
12  
13  
14  
15  
16  
17  
18  
19  
20  
21  
22  
23  
24  
25  
26  
27  
28  
29  
30  
31  
32  
33

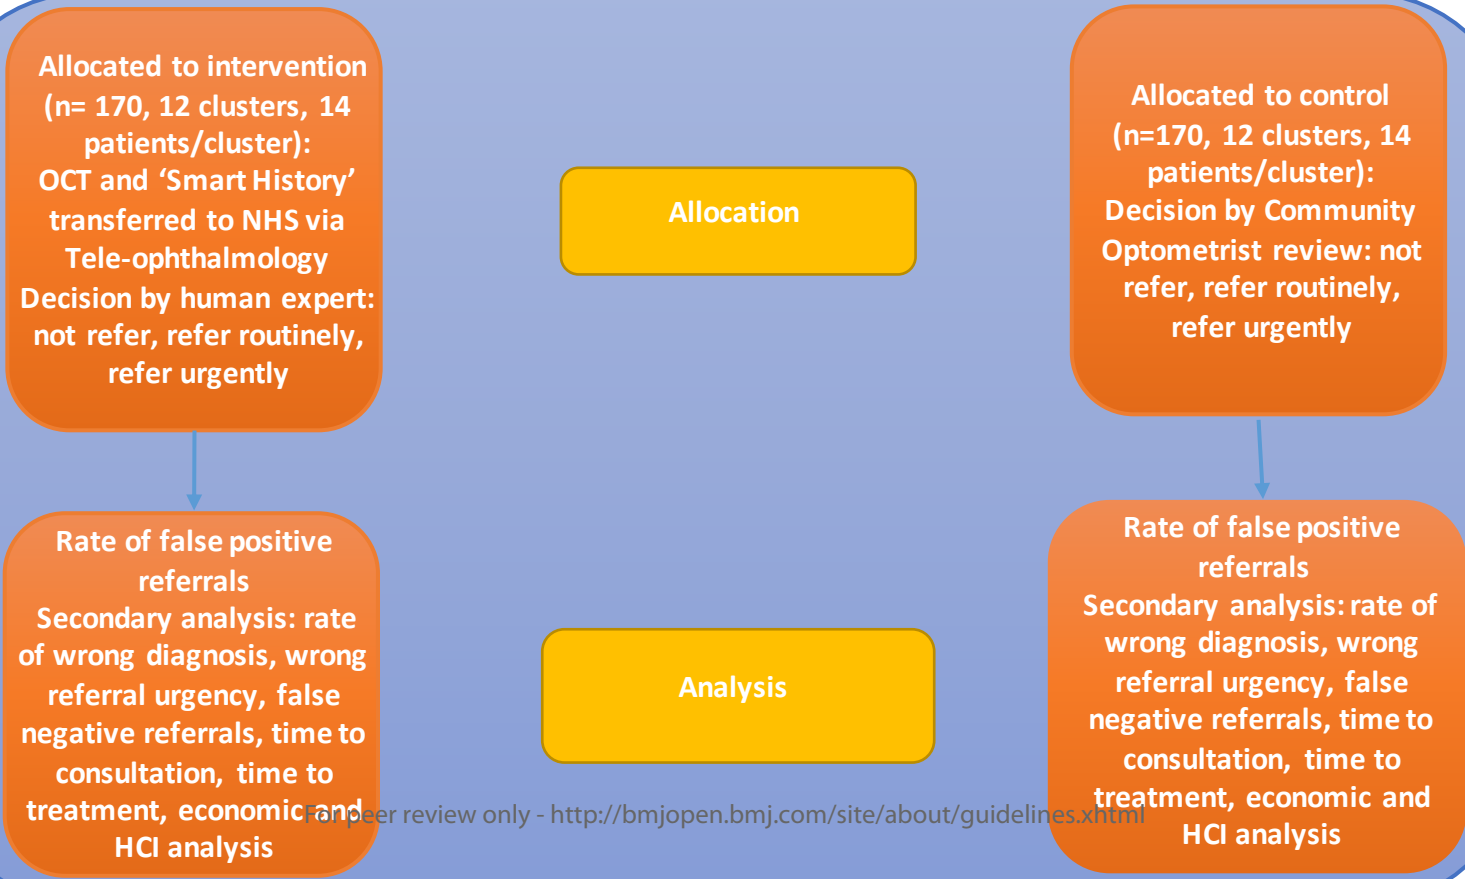

# STARD Artificial Intelligence Observational Prospective Diagnostic Study

OCTs analysed by the Moorfields-Deepmind  
Algorithm (n=500, Index test):  
Diagnosis, referral decision

Index Test:  
Refer to  
HES n=

Index Test:  
Not refer to  
HES n=

Reference  
Standard  
n=

Reference  
Standard  
n=

Correct Referral Decision (n=)  
Incorrect Referral Decision (n=)

Correct Referral Decision (n=)  
Incorrect Referral Decision (n=)

**Accuracy for referral and diagnosis**  
Cross tabulate: accuracy data for  
Optometrist, Hospital Eye Service and  
AI against reference standard

1  
2  
3  
4  
5  
6  
7  
8  
9  
10  
11  
12  
13  
14  
15  
16  
17  
18  
19  
20  
21  
22  
23  
24  
25  
26  
27  
28  
29  
30  
31  
32  
33

# Appendix

## Table of Contents

Appendix 1. Sampling, Recruitment and Analysis Methods

Appendix 2. Participant Information Sheet and Consent Form

Appendix 3. Digital Pathway Decisions

Appendix 4. Statistical Consideration

4.1 Sample Size Calculation

Recruitment plan

Pragmatic Sub-Study

4.2 Statistical analysis

Appendix 5. Case Report Form

Appendix 6. Trial Documents and Subject Records

6.1 CRFs and Source Document Identification

6.2 Confidentiality of Trial Documents and Subject Records

6.3 Procedures for validation and securing of electronic clinical data systems

6.4 Data handling and record keeping

Appendix 7. References

## Appendix 1. Sampling, Recruitment and Analysis Methods

Purposive sampling techniques will be applied to recruit participants who are representative of all key patient and professional groups across all sites, including both “power users” and reluctant users. In each setting, the aim will be to interview 15 patients and up to 10 clinicians and other professionals (settings: secondary care clinics; pre-; and post-transitioning optometry practices), depending on the sizes of the clinics selected for inclusion. The interviews will be conducted by a Process Evaluation Specialist, they will be semi-structured and will be designed to address the research objectives outlined above. Probes such as anonymised screenshots from the digital referral platform and illustrative information presentation prototypes from the DeepMind algorithm will be used in interviews to support the exploration of the themes. Interview data will be transcribed and analysed by a qualitative methods expert using inductive Thematic Analysis, with a particular focus on facilitators and barriers to change, and the factors that contribute to successful change. These will include questions around trust in technology and data privacy as well as efficiency and effectiveness and changes in clinician workflow and patient experience. Data gathering and analysis will be interleaved, so that later data gathering is informed by the findings from earlier analysis.

Small-scale ethnographic observations will be conducted in all settings, observing both selected clinician-patient interactions around the diagnostic process (community optometry and HES) and clinician tele-care practices (HES). 3-5 clinician-patient consultations will be observed per setting; debrief interviews with patients will cover the same themes as the interviews with practitioners but be sensitive to the different perspectives of patients and professionals. Detailed field notes will be kept of all observations. This data will also be subjected to thematic analysis, focusing on workflows, variability in workflows, and any problems experienced during the interaction (particularly related to technology use).

Patients will be invited to participate at the time that they receive their appointment letter, so that they have time to consider whether they wish to do so (for informed consent), and to plan their clinic visit time to accommodate a short interview (15 mins approx.) after their appointment. On the day of the visit the investigator will provide the patient information leaflet (PIS; **Appendix 1**) to the patient and go through it highlighting what the purpose of the study is, what it entails if the patient decides to take part and possible advantages and disadvantages and risks of taking part. When the patient has had ample time to read the PIS and ask questions regarding the study, the patient will be asked to sign an informed consent form (ICF; **Appendix 1**). Once the informed consent process is complete a copy of the ICF will be provided to the participant, and the signed form will be filed in the participant’s study records. Once the informed consent process is complete, the investigator will record the decision in the case history form.

As this is a cluster randomised clinical trial, randomisation applies at the level of entire community optometry practices. The practices randomised to the intervention arm (tele-ophthalmology) will adopt this pathway for all patient referrals to secondary care as standard practice. Patient-level consent for this study pertains to allowing use of collected data for analysis but participation in the study will not

1  
2  
3 affect patient-level care. Given the urgent presentation of the patient population we will approach for  
4 participation in this study and the fact that patient management will not be influenced by  
5 randomisation as described above, a 24-hour minimum period of consideration for patient  
6 participation is not warranted. Patients approached for participation will be given the study-specific  
7 PIS and adequate time to have any queries addressed by the clinical team before deciding on  
8 participation to the study.  
9  
10  
11  
12  
13  
14  
15  
16  
17  
18  
19  
20  
21  
22  
23  
24  
25  
26  
27  
28  
29  
30  
31  
32  
33  
34  
35  
36  
37  
38  
39  
40  
41  
42  
43  
44  
45  
46  
47  
48  
49  
50  
51  
52  
53  
54  
55  
56  
57  
58  
59  
60

## Appendix 2. Participant Information Sheet and Consent Form

### Patient Information Sheet

**Study title:** Tele-ophthalmology-enabled and Artificial Intelligence-ready referral pathway for community optometry referrals or retinal disease: a cluster Randomised Superiority trial with a linked Observational Diagnostic Accuracy Study

**Short title:** HERMES

**Protocol Reference Number:** BALK1006

We would like to invite you to take part in our research study. Before you decide we would like you to understand why the research is being done and what it would involve for you. One of our team will go through the information sheet with you and answer any questions you have. We'd suggest this should take about 15 minutes. Talk to others about the study if you wish.

Part 1 tells you the purpose of this study and what will happen to you if you take part. Part 2 gives you more detailed information about the conduct of the study.

Ask us if there is anything that is not clear. Take time to decide whether or not you wish to take part.

#### Part 1

##### 1. What is the purpose of the study?

Early diagnosis of retinal condition (including Age-related Macular degeneration) is classified using imaging technology called Optical coherence tomography (OCT). This technology is becoming more available in community based optometry practices (high street optometry practices); however, interpreting the imaging scans can require hospital level expertise.

As a result of this, a large proportion of patients with retinal disease are incorrectly referred to hospital based eye clinics for diagnostics and disease management. This has led to an increasing pressure on hospital eye services and can cause delay in access for patients with sight threatening disease.

In this study we will involve patients with suspected retinal condition who have attended an eye examination appointment at a participating community practice. Patients that want to take part will be referred to the hospital eye service via the standard pathway for either: urgent care, routine care or not referred at all depending on the clinical assessment and OCT scan taken by the community optometrist.

The study will seek to show that we can improve patient care by using tele-Ophthalmology technologies to manage the proportion of referrals that do not need to attend hospital eye service for consultations and can be managed safely by community based optometry practices. Half of the optometry practices involved in this study will do the referrals through a 'tele-ophthalmology' process. This means that your eye scans and other clinical information will be reviewed remotely by expert clinicians at corresponding NHS eye hospitals and they will make the referral decision instead of the optometrists.



1  
2  
3  
4  
5  
6  
7  
8  
9  
10 Your eye scans may also be processed at a later time by an Artificial Intelligence  
11 algorithm that can read the scans and also make a referral decision. The Artificial  
12 Intelligence algorithm has been developed previously through the collaboration  
13 between Moorfields Eye Hospital and Google/Deepmind. This algorithm will be  
14 introduced in the Reading Centre (Moorfields Eye Hospital NHS Trust), all data  
15 analysis will be performed within the Reading Centre (Moorfields Eye Hospital NHS  
16 Trust) and no research data will be shared or analysed externally to the research  
17 team. During this study, the Artificial Intelligence algorithm will analyse the OCT and  
18 make a recommendation on whether a referral to the hospital is needed or not; this  
19 will then be compared with the referral recommendation made by an expert clinician  
20 for your care and will not impact on your care in any way. The actual decision to  
21 refer or not will be made by a human expert in every case and not by the algorithm.  
22

23  
24 Additionally, in a sub-study we want to involve patients with suspicion of retinal  
25 disease who are already being referred to the hospital eye services via a tele-  
26 ophthalmology platform. The patient's clinical history and OCT scan will be reviewed  
27 by experts at the participating hospital eye service and a referral decision will be  
28 made remotely. This sub-study is seeking to understand what impact the introduction  
29 of tele-ophthalmology has in a real-life setting where tele-ophthalmology is already  
30 used to refer patients to the hospital eye services and also in terms of patient care  
31 and managing unnecessary referral that are made by the community based practices  
32 to the hospital based eye services.  
33

## 34 **2. Why have I been invited?**

35  
36  
37 You have been invited to take part in this study because you are attending an eye  
38 examination appointment at a participating community optometry practice that  
39 undergo OCT scans and have been diagnosed with suspicious retinal disease.  
40

## 41 **3. Do I have to take part?**

42  
43  
44 It is up to you to decide to join the study. We will describe the study and go through  
45 this information sheet. If you agree to take part, we will then ask you to sign a  
46 consent form. You are free to withdraw at any time without giving a reason. This  
47 would not affect the standard of care you receive. If you decide not to take part in the  
48 study, you will still have your normal eye examination and an eye scan.  
49

## 50 **4. What will happen to me if I take part?**

51  
52  
53 If you decide to take part in this study, you (and if applicable a witness) will be asked  
54 to sign and date a consent form. The consent form will be signed in the presence of a  
55 trained healthcare professional who will also sign and date it. You will be provided a  
56 copy of this to keep. After the consent process you will undergo a clinical assessment  
57 and have an eye scan (OCT). If you take part in the routine care arm of the study, a  
58 referral decision will be made as usual by your community optometrist who will  
59 decide whether you will need to be; referred urgently to a hospital eye service,  
60

1  
2  
3  
4 routinely or not referred at all. The referral decision will be sent as per standard  
5 practice to the corresponding hospital eye service. If you take part in the tele-  
6 ophthalmology arm of the study, expert clinicians at the corresponding NHS eye  
7 hospital will review your eye scan and other clinical information remotely and will  
8 make the referral decision.  
9

10 You will not have a choice about which arm of the study you will participate in, as the  
11 optometry practice will already have been pre-assigned either the routine referral arm  
12 or the tele-ophthalmology arm. However this will not influence in any aspect the  
13 standard of care you will receive during this visit. You will receive the same care  
14 whether you are in the routine care arm or in the tele-ophthalmology arm.

15 Only your community optometrist or an expert clinician will make a referral decision  
16 after reviewing your eye scan and clinical information, however you will not be able to  
17 decide who will make the referral decision. Additionally, a computer program (AI)  
18 may analyse your eye scan and give its own clinical diagnosis, however this will not  
19 influence the referral decision that will be made. By using this computer program we  
20 only want to obtain information that will help clinicians to make a better clinical  
21 decision and diagnosis in the future for people with retinal disease.  
22  
23

24 If you decide to take part in the sub-study, you will undergo the consent process as  
25 described above. After the consent process you will undergo a clinical assessment  
26 and have an eye scan (OCT). Your community optometrist will make a referral  
27 decision as usual who will decide whether you need to be referred urgently to a  
28 hospital eye service, routinely or not referred at all. After reviewing your eye scan,  
29 your community optometrist will send the referral via tele-ophthalmology to the  
30 corresponding NHS eye hospital. Expert clinicians at the corresponding NHS eye  
31 hospital will review your eye scan and other clinical information remotely and will  
32 make the referral decision.  
33  
34  
35

## 36 **5. What are the possible risks and benefits of taking part?**

37  
38 This study has no invasive testing and no therapeutic interventions; therefore there is  
39 minimal risk to patients if they choose to participate in this study. Your eyes may be  
40 dilated during your visit for the OCT scan. This will make you sensitive to light, blur  
41 your vision and may make it difficult to focus on close up objects for 4-6 hours.  
42

43 We cannot promise the study will help you, but the information we get from this study  
44 will help improve the experience of care of people with retinal disease and improve  
45 the referral pathway between community optometry practices and the hospital eye  
46 service.  
47  
48  
49

## 50 **6. What if there is a problem?**

51 Any complaint about the way you have been dealt with during the clinical trial or any  
52 possible harm you might suffer will be addressed. The detailed information  
53 concerning this is given in Part 2 of this information sheet. If you have any concerns  
54 or complaints you should contact your study doctor in the first instance.  
55  
56

## 57 **7. Will my taking part in the study be kept confidential?**

58 Yes. We will follow ethical and legal practice and all information about you will be  
59 handled in confidence. The details are included in Part 2.  
60

## 8. Contact Details

### Principal investigator

Name: Tel. Number:

### Research Project Manager

Name: Tel. Number:

This completes Part 1 of the Information Sheet.

If the information in Part 1 has interested you and you are considering participation, please read the additional information in Part 2 before making any decision.

## Part 2

### 9. What if relevant new information becomes available?

On receiving new information, we might consider it to be in your best interests to withdraw you from the study. If so, we will explain the reasons and arrange for your care to continue. If the study is stopped for any other reason, we will tell you why and arrange your continuing care.

### 10. What will happen if I don't want to carry on with the study?

If you withdraw from the study, we will destroy all your identifiable information, but we will need to use the data collected up to your withdrawal.

### 11. What if there is a problem?

If you have a concern about any aspect of this study, you should ask to speak to the researchers who will do their best to answer your questions .... If you remain unhappy and wish to complain formally, you can do this by contacting the PALS team at ....

If taking part in this research project harms you, there are no special compensation arrangements. If you are harmed due to someone's negligence, then you may have grounds for legal action but you may have to pay for it. Regardless of this, if you wish to complain about any aspect of the way you have been approached or treated during the course of this study, the normal National Health Service complaints mechanisms will be available to you.

### 12. Will use of my data meet the GDPR rules?

Yes, all data will be handled in accordance with the General Data Protection Regulations (GDPR) and UK Data Protection Act 2018, The Research Governance

1  
2  
3  
4 Framework for Health and Social Care and the conditions for the Research Ethics  
5 Committee favorable opinion.  
6

7 Moorfields Eye Hospital NHS Trust is the Sponsor for this study based in the United  
8 Kingdom. We will be using information from you and/or your medical records in order  
9 to undertake this study and will act as the data controller for this study. This means  
10 that we are responsible for looking after your information and using it properly.  
11

12 Your rights to access, change or move your information are limited, as we need to  
13 manage your information in specific ways in order for the research to be reliable and  
14 accurate. If you withdraw from the study, we will keep the information about you that  
15 we have already obtained.  
16

17 You can find out more about how we use your information by visiting  
18 [www.moorfields.nhs.uk/content/how-we-use-your-information](http://www.moorfields.nhs.uk/content/how-we-use-your-information) or please contact your  
19 research team (study team contact details can be found in your participant  
20 information sheet).  
21

22  
23 (SITE NAME) will use your name, and contact details to contact you about the  
24 research study, and make sure that relevant information about the study is recorded  
25 for your care, and to oversee the quality of the study. Moorfields Eye Hospital and  
26 their study collaborators (which may include Universities) will receive information  
27 from your medical record for the purposes of the study but without your name or any  
28 other personal details. (SITE NAME) will pass to Moorfields Eye Hospital this  
29 information collected from you and/or your medical records. The only people in (SITE  
30 NAME) who will have access to information that identifies you will be people who  
31 need to contact you to arrange appointments or audit the data collection process.  
32 The people who analyse the information will not be able to identify you and will not be  
33 able to find out your name or contact details. Data collected for this study, without  
34 your name or any other personal details, can be used for future research. If you  
35 agree to take part in this study, we will also specifically ask for your permission to use  
36 your data for future research. If you don't want your data to be used for any future  
37 research, you can still participate in this study.  
38  
39

40 Moorfields Eye Hospital will keep identifiable information about you from this study  
41 without your personal details for 15 years.  
42

### 43 **13. Will my GP be informed of my involvement?**

44  
45 With your permission, your GP, and other doctors who may be treating you, will be  
46 notified that you are taking part in this study.  
47  
48

### 49 **14. What will happen to the results of the research study?**

50 The results of the study will be available after it finishes and will usually be published  
51 in a medical journal or be presented at a scientific conference. The data will be  
52 anonymous and none of the patients involved in the trial will be identified in any  
53 report or publication.  
54

55  
56 Should you wish to see the results, or the publication, please ask your study doctor.  
57

### 58 **15. Who is organising and funding the research?**

1  
2  
3  
4 The study is organized by Moorfields Eye Hospitals NHS Foundation Trust and  
5 funded by the National Institute for Health Research.  
6

7  
8 **16. Who has reviewed the study?**

9 All research in the NHS is looked at by independent group of people, called a  
10 Research Ethics Committee, to protect your interests. This study has been reviewed  
11 and given favourable opinion by London – Bromley Research Ethics Committee.  
12

13  
14 **17. Further information and contact details**

15 You are encouraged to ask any questions you wish, before, during or after your  
16 treatment. If you have any questions about the study, please speak to your study  
17 Optometrists or doctor, who will be able to provide you with up to date information  
18 about the procedure(s) involved. If you wish to read the research on which this study  
19 is based, please ask your study optometrists or doctor. If you require any further  
20 information or have any concerns while taking part in the study please contact one of  
21 the following people:  
22  
23  
24  
25  
26  
27

28 **Principle Investigator**

29 Name: Tel. Number:  
30  
31  
32

33 **Research Project Manager**

34 Name: Tel. Number:  
35  
36  
37

38 If you decide you would like to take part then please read and sign the consent form.  
39 You will be given a copy of this information sheet and the consent form to keep. A  
40 copy of the consent form will be filed in your patient notes, one will be filed with the  
41 study records and one may be sent to the Research Sponsor.  
42

43 You can have more time to think this over if you are at all unsure.  
44

45 Thank you for taking the time to read this information sheet and to consider this study.  
46  
47  
48  
49  
50  
51  
52  
53  
54  
55  
56  
57  
58  
59  
60

### Appendix 3. Digital Pathway Decisions

The following scenarios can occur in the intervention arm:

1. Community optometrist recommendation: **Refer urgently to HES**—> OCT scan and clinical data are transferred to ‘tele-HES’ and reviewed within 48h remotely by human expert —> Referral Decision is made in ‘tele-HES’ (refer urgently, refer routinely, don’t refer) and fed-back to the community optometry practice to be implemented.
2. Community optometrist recommendation: **Refer routinely to HES**—> OCT scan and clinical data are transferred to ‘tele-HES’ and reviewed within 48h remotely by human expert —> Referral Decision is made in ‘tele-HES’ (refer urgently, refer routinely, don’t refer) and fed-back to the community optometry practice to be implemented.
3. Community optometrist recommendation: **Don’t refer to HES**—> OCT scan and clinical data are transferred to ‘tele-HES’ and reviewed within 48h remotely by human expert —> Referral Decision is made in ‘tele-HES’ (refer urgently, refer routinely, don’t refer) and fed-back to the community optometry practice to be implemented.

## Appendix 4. Statistical Consideration

The trial statisticians based at King's Clinical Trial Unit will write the statistical analysis plan before database lock and will perform the analysis using the Stata software (StataCorp, College Station, TX, USA).

### 4.1 Sample Size Calculation

The primary outcome is the proportion of false positive referrals. Under the current system an audit conducted at Moorfields Eye Hospital NHS Foundation Trust in September 2018 showed that 70 % of retinal referrals were false positive.[1] A pilot study on 40 patients conducted in three optometry practices showed that this could be reduced by 60 %.[1] A 95 % confidence interval computed by the modified Wald Method as advised by Agresti and Coull would extend 44.6% to 73.7%.[2] There is consensus amongst clinicians however that given the savings to the NHS and benefit to patients, slightly smaller differences would be important to detect and we have powered the study to examine a reduction to 40 % false referrals. Whilst smaller differences might yet be important it would seem unethical to power for lower than 40 % based on the observed data and clinical expertise in this area.

Although decisions for patients are made on an individual basis each patient cannot be assumed to generate independent information since they will be clustered within optometry practices. The correlation of information from patients within a cluster (the intraclass correlation) is estimated to be 0.15. We have based this intraclass correlation on previous work conducted in ophthalmology [3, 4] with a clinical outcome similar to this study. Since this is an estimate we have increased the intraclass correlation slightly to allow for the potential that patients within the same optometry practice may be more similarly managed than patients within different practices although clinical consensus is that clinical signs are more likely to impact upon decision making for referral than individual optometrist attitudes. Using nQuery software version 8.3.10, a hierarchical 2-level mixed effects model was used to calculate the required sample size. 24/26 clusters split between the study arms in a 1:1 ratio need to recruit an average of 12/10 patients per clusters (12 patients if 24 clusters, 10 patients if 26 clusters) in order to achieve 89.27% power to detect a difference in the proportion of false positive referrals of 30% (a drop from the current rate of 70% to the clinically relevant rate of 40%). This calculation assumes an intraclass correlation of 0.15 and the test is performed at the 5% significance level.

A total of 288 patients (based on an average of 12 patients recruited at 24 clusters, 144 per study arm) would therefore be needed to complete the data analysis with sufficient statistical power. To allow for an anticipated 15% drop out rate (patients are likely to be elderly and have comorbidity causing motion artefacts and some images may be ungradable), the total sample size is 340 patients (170 per study arm).

The sample size of the RCT and pragmatic sub-study combined will also enable the AI observational diagnostic accuracy study to obtain robust estimates of sensitivity and specificity. All 500 patients (accounting for the anticipated drop-out rate) will be included in the AI study. Classifications will be

1  
2  
3 made without additional clinical information. Research from our group suggests that the diagnostic  
4 accuracy of the Moorfields-DeepMind AI will be as high as 95%.[5] This combined sample of 500  
5 patients with 475 patients being correctly diagnosed would produce a two-sided 95.0% confidence  
6 interval with a width of 0.039. The sample from the RCT alone -288 patients with 274 being correctly  
7 diagnosed - produce a two-sided 95.0% confidence interval with a width of 0.052. PASS has been  
8 used to calculated these widths.  
9  
10  
11

### 12 13 **Recruitment plan**

14  
15 On the basis of feedback provided by optometry practices already identified and interested in  
16 participating in the study, an average of 3 eligible patients can be approached to consider  
17 participation in the study per month per cluster, with a range of 2-5 patients based on the size of the  
18 optometry practice. However, it is also expected that 35% of potential patients will decline to  
19 participate. Currently, different sites are at different stages of readiness for commencing recruitment  
20 and therefore a staggered start to recruitment over 3 months is embedded in the recruitment plan.  
21 Based on these conservative estimates a recruitment period of 12 months with a staggered initiation  
22 over the first 3 months will be sufficient to approach 521 patients, of whom it is expected that 340  
23 patients will be recruited to the study. A smaller practice only approaching 2 patients per month will  
24 require 11 months to recruit 12 patients (accounting for drop out and decline to participate). If the  
25 practice was one of the last to start recruitment and so started 3 months into the recruitment window,  
26 they would still manage to recruit 10 patients in 9 months (accounting for drop out and decline to  
27 participate). A larger practice in the same catchment area will be able to compensate by over-  
28 recruiting up to a set maximum of 16 patients. The range of cluster size will thus be 10-16 patients.  
29  
30  
31  
32  
33  
34  
35

36 The 2 additional randomised community practices allow the potential to increase the number of  
37 clusters to 26 if further acceleration of recruitment is required. 26 clusters will be required to recruit  
38 306 patients overall with an average of 10 patients per cluster (and a minimum of 8 patients per  
39 cluster) in order to achieve 89.27% power to detect a difference in the proportion of false positive  
40 referrals of 30% - using the same parameters as the sample size calculation for the 24 clusters.  
41  
42  
43

### 44 **Pragmatic Sub-Study**

45  
46 Manchester Eye Hospital and its local area, a site included in the original protocol, has already moved  
47 to a tele-ophthalmology referral pathway as part of a commissioning change across the local region.  
48 This change in standard care provides a unique opportunity to examine whether tele-ophthalmology  
49 works under usual conditions within the NHS. This sub-study will allow us to measure and visualise  
50 variation in quality of health care within a local region to inform our inferences from the RCT on how  
51 the tele- ophthalmology pathway will perform within a real-life setting.  
52  
53  
54

55 From this study, key estimate statistics will be calculated including the overall rate of referral to HES,  
56 the false positive (referral) and false negative rate against the Reference Standard and the proportion  
57 of wrong diagnosis and wrong referral urgency. These shall be compared to the rates found for the  
58 intervention arm of the main RCT.  
59  
60



1  
2  
3 Recruiting 18 patients from each of 12 tele-optometry practices (for a total of 216 patients) will allow  
4 the proportion of false positive referrals to be produced with a 95% confidence interval with a width  
5 less than 0.187. This was calculated based on confidence intervals for one proportion within a cluster-  
6 randomised design with an intracluster correlation of 0.15. A total of 216 patients (based on an  
7 average of 18 patients recruited from 12 clusters) would therefore provide a certain degree of  
8 precision. To allow for an anticipated 15% drop out rate (patients are likely to be elderly and have  
9 comorbidity causing motion artefacts and some images may be ungradable), the total sample size is  
10 254 patients. It is expected that 35% of participants will decline to participate and so 390 patients  
11 would need to be approached. These patients can be recruited over a period of 18 months with an  
12 average of 3 patients approached by each practice per month.  
13  
14  
15  
16  
17

## 18 **4.2 Statistical analysis**

19  
20 The primary analysis will be conducted following an intention to treat principle where all randomised  
21 patients are analysed in their allocated group whether or not they receive their randomised management  
22 plan. Baseline characteristics will be summarised for each management group (standard care or tele-  
23 ophthalmology). We will report the number of clusters in each group and the size of clusters.  
24 Continuous data will be summarised using means and standard deviations if data appear Gaussian or  
25 medians and interquartile ranges. Categorical data will be reported as proportions and percentages.  
26  
27  
28  
29

30 The primary outcome is the proportion of false referrals. The outcome is measured at the patient level.  
31 This will be compared between management groups using logistic regression adjusting for clustered  
32 centres. Outcomes will be reported as adjusted odds ratios. We will also report the difference in  
33 proportions with a 95 % confidence interval as per the CONSORT extension for cluster randomised  
34 controlled trials. We will report false referral rates with 95 % confidence intervals computed by the exact  
35 binomial method by diagnosis and by level of urgency. The results will be presented at the cluster level  
36 and overall.  
37  
38  
39

40 Secondary outcomes such as time from referral to review in HES and treatment will be analysed in a  
41 similar fashion. The percentage of patients experiencing adverse events in the two groups will be  
42 reported with 95 % confidence intervals computed by the exact binomial method.  
43  
44  
45

46 Loss to follow-up will be examined by study arm. Reasons for missingness may be important and these  
47 will be investigated using logistic regression of covariates based on an indicator of missingness. An  
48 available case analysis will be reported along with an analysis using imputed data based on best- and  
49 worst-case scenarios. Since this is a cluster RCT we will also examine and report missingness by  
50 cluster.  
51  
52  
53

54 No formal interim analysis is planned but reports concerning patient safety will be prepared for review  
55 by the Independent Data Monitoring Committee. All tests will be two sided and will be assessed at the  
56 5 % significance level unless otherwise specified. All confidence intervals will be 95 % and two sided.  
57 A detailed statistical analysis plan will be agreed with the Trial Steering Group prior to any analysis of  
58 locked data. All statistical analysis will be performed using Stata (StataCorp, College Station, TX, USA).  
59  
60

1  
2  
3 Statisticians analysing the data will be masked to the management group status of the practise and  
4 patient.  
5

6  
7 In the AI diagnostic accuracy study, we will report estimates of sensitivity and specificity of the  
8 DeepMind algorithm for referral decisions with 95 % confidence intervals. Our primary analysis will  
9 combine urgent and standard referral to HES and compare against no referral to HES but a sensitivity  
10 analysis will be conducted to evaluate urgent referrals. The referral outcome (refer routinely, refer  
11 urgently, don't refer) will be cross tabulated for the DeepMind algorithm and each of the RCT treatment  
12 arms (community optometry and 'tele-HES'), the pragmatic sub-study, and for the Reference Standard.  
13  
14  
15  
16  
17  
18  
19  
20  
21  
22  
23  
24  
25  
26  
27  
28  
29  
30  
31  
32  
33  
34  
35  
36  
37  
38  
39  
40  
41  
42  
43  
44  
45  
46  
47  
48  
49  
50  
51  
52  
53  
54  
55  
56  
57  
58  
59  
60

## Appendix 5. Case Report Form

Moorfields Eye Hospital, Case Report Form  
BALK1006

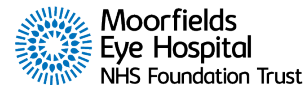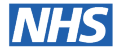

Study No:   -

### HERMES Study Completing Case Report Forms (CRFs)

**This document has been created to provide guidelines about completing clinical trial case report forms at Moorfields Eye Hospital (MEH). The information has been extracted from the standard operating procedures (SOPs) 'Completing, Correcting & Signing off Case Report Forms (CRF\_S07)' that have been developed by the Research & Development department at Moorfields.**

1. The CRF must be completed as soon as possible after the patient has been assessed or during the assessment if the CRF is the source data.
2. CRFs must be completed using a black ink ballpoint pen.
3. If the CRF is printed on carbonless duplication paper, a suitable separator must be inserted under the form being completed.
4. Data entry into the CRF must be complete as without omissions. If data are unavailable then 'unknown', 'missing', 'test not done' etc. should be inserted. The ambiguous phrase, 'not available' should be avoided.
5. All entries into the CRF must be accurate, legible and verifiable with the source data in the medical records (unless the CRF is the source data). Data must not be invented – this is fraud.

*N.B. Whenever a subject has been seen by clinical staff for the purposes of a clinical trial, the time, date and reason for visit must always be entered into the subject's corresponding hospital notes. Copies of trial investigations/results that are clinically significant or have an impact on the patient's clinical care must also be filed in the medical notes.*

6. Any discrepancies between the CRF and the source data should be explained and the significance noted in the CRF and/or patient's medical records.
7. All CRF data derived from source documents must be transcribed exactly.
8. For laboratory values that fall outside the laboratory's reference range or trial specific range or when a value shows a significant variation from one assessment to the next, this should be commented on and the significance noted in the CRF and/or patient's medical records.
9. The subject's identity should remain confidential at all times and as such the trial subject must only be identified in the CRF using a trial number or code.
10. Entries into the CRF must never be overwritten.
11. Corrections to the CRF must be made as follows:
  - An incorrect entry must be deleted with a single line through the text allowing the incorrect entry to remain legible. Correction fluid must never be used and entries must not be obliterated.
  - The correct data must be entered.
  - The correction must be initialled and dated and an explanation given of the correction, if applicable.
12. The CRF must be signed and dated where indicated, by the chief/principal investigator or designee (for example, research nurse at the end of an assessment) to assert that he/she believes the data is completed and correct.

Study No:   -

**HERMES Study**

PATIENT DEMOGRAPHICS (Community Optometry)

Page 1/2

| ALL FIELDS ARE MANDATORY              |                                                                              |                                        |                                                           |
|---------------------------------------|------------------------------------------------------------------------------|----------------------------------------|-----------------------------------------------------------|
| Patient Details                       |                                                                              |                                        |                                                           |
| Study site                            | MEH <input type="checkbox"/>                                                 | Manchester <input type="checkbox"/>    | Birmingham <input type="checkbox"/>                       |
|                                       | Central Middlesex <input type="checkbox"/>                                   |                                        | North West Anglia <input type="checkbox"/>                |
| Optometrist site                      |                                                                              |                                        |                                                           |
| Randomisation Cluster number          |                                                                              |                                        |                                                           |
| Randomisation Arm                     | Control <input type="checkbox"/>                                             | Intervention <input type="checkbox"/>  |                                                           |
| Age                                   | ( $\geq 18$ ) <input type="text"/> <input type="text"/> <input type="text"/> |                                        |                                                           |
| Sex                                   | Male <input type="checkbox"/>                                                | Female <input type="checkbox"/>        |                                                           |
| Medical history                       | Yes                                                                          | No                                     | Yes                                                       |
|                                       | Heart attack <input type="checkbox"/>                                        | <input type="checkbox"/>               | TIA/Stroke <input type="checkbox"/>                       |
|                                       | COPD <input type="checkbox"/>                                                | <input type="checkbox"/>               | Impaired Mobility <input type="checkbox"/>                |
|                                       | Diabetes <input type="checkbox"/>                                            | <input type="checkbox"/>               | Asthma <input type="checkbox"/>                           |
|                                       | Hypertension <input type="checkbox"/>                                        | <input type="checkbox"/>               | Other <input type="checkbox"/>                            |
| If other please specify               |                                                                              |                                        |                                                           |
| Medication for eye condition          | Yes <input type="checkbox"/>                                                 | No <input type="checkbox"/>            |                                                           |
| <i>If yes specify glaucoma drops?</i> | Prostaglandins <input type="checkbox"/>                                      | CA inhibitors <input type="checkbox"/> | B-blockers <input type="checkbox"/>                       |
| <i>If yes specify AREDS</i>           | Yes <input type="checkbox"/>                                                 | No <input type="checkbox"/>            |                                                           |
| Smoker?                               | Ex-smoker <input type="checkbox"/>                                           | Smoker <input type="checkbox"/>        | Non-smoker <input type="checkbox"/>                       |
|                                       | Right Eye                                                                    | Left eye                               |                                                           |
| Ocular history                        | Yes                                                                          | No                                     | Yes                                                       |
|                                       | Wet AMD <input type="checkbox"/>                                             | <input type="checkbox"/>               | Wet AMD <input type="checkbox"/>                          |
|                                       | Dry AMD <input type="checkbox"/>                                             | <input type="checkbox"/>               | Dry AMD <input type="checkbox"/>                          |
|                                       | Central Serous Chorioretinopathy <input type="checkbox"/>                    | <input type="checkbox"/>               | Central Serous Chorioretinopathy <input type="checkbox"/> |
|                                       | Central Retinal Vein Occlusion <input type="checkbox"/>                      | <input type="checkbox"/>               | Central Retinal Vein Occlusion <input type="checkbox"/>   |
|                                       | Branch Retinal Vein Occlusion <input type="checkbox"/>                       | <input type="checkbox"/>               | Branch Retinal Vein Occlusion <input type="checkbox"/>    |
|                                       | Diabetic Macular Oedema <input type="checkbox"/>                             | <input type="checkbox"/>               | Diabetic Macular Oedema <input type="checkbox"/>          |
|                                       | Inherited Eye Disease <input type="checkbox"/>                               | <input type="checkbox"/>               | Inherited Eye Disease <input type="checkbox"/>            |
|                                       | Other <input type="checkbox"/>                                               | <input type="checkbox"/>               | Other <input type="checkbox"/>                            |
|                                       | <i>If other, specify</i>                                                     |                                        |                                                           |

Study No:   -

**HERMES Study**

PATIENT DEMOGRAPHICS (Community Optometry)

**ALL FIELDS ARE MANDATORY**

| Patient Details         |                  |                          |                          |                  |                          |                          |
|-------------------------|------------------|--------------------------|--------------------------|------------------|--------------------------|--------------------------|
| Previous eye procedures |                  | Yes                      | No                       |                  | Yes                      | No                       |
|                         | Cataract surgery | <input type="checkbox"/> | <input type="checkbox"/> | Cataract surgery | <input type="checkbox"/> | <input type="checkbox"/> |
|                         | Glaucoma surgery | <input type="checkbox"/> | <input type="checkbox"/> | Glaucoma surgery | <input type="checkbox"/> | <input type="checkbox"/> |
|                         | Eyelid surgery   | <input type="checkbox"/> | <input type="checkbox"/> | Eyelid surgery   | <input type="checkbox"/> | <input type="checkbox"/> |
|                         | Other            | <input type="checkbox"/> | <input type="checkbox"/> | Other            | <input type="checkbox"/> | <input type="checkbox"/> |
| <i>If other specify</i> |                  |                          |                          |                  |                          |                          |

Comments

For peer review only

**I can confirm that the patient meets all eligibility criteria for the study and I have completed this form in full and take full responsibility for any missing data.**

|                                                  |                      |                                                                                                                                   |
|--------------------------------------------------|----------------------|-----------------------------------------------------------------------------------------------------------------------------------|
| <b>Signed:</b>                                   | <b>Print:</b>        | <b>Date:</b>                                                                                                                      |
| <input type="text"/>                             | <input type="text"/> | <input type="text"/> / <input type="text"/> / <input type="text"/> <input type="text"/> <input type="text"/> <input type="text"/> |
| <b>Office use only, data entry completed by:</b> |                      |                                                                                                                                   |
| <b>Signed:</b>                                   | <b>Print:</b>        | <b>Date:</b>                                                                                                                      |
| <input type="text"/>                             | <input type="text"/> | <input type="text"/> / <input type="text"/> / <input type="text"/> <input type="text"/> <input type="text"/> <input type="text"/> |

Study No:   -

**HERMES Study**

**BASELINE VISIT (Community Optometry)**

| ALL FIELDS ARE MANDATORY                      |                                                                                                                                                                                          |                                                                       |                                                                                    |
|-----------------------------------------------|------------------------------------------------------------------------------------------------------------------------------------------------------------------------------------------|-----------------------------------------------------------------------|------------------------------------------------------------------------------------|
| Baseline Exam                                 |                                                                                                                                                                                          |                                                                       |                                                                                    |
| Date of visit                                 | (dd mm yyyy) <input type="text"/> <input type="text"/> / <input type="text"/> <input type="text"/> / <input type="text"/> <input type="text"/> <input type="text"/> <input type="text"/> |                                                                       |                                                                                    |
| Years since diagnosis of any retinal disease? | <input type="text"/> <input type="text"/>                                                                                                                                                |                                                                       |                                                                                    |
| OCT Device                                    | Topcon 3D OCT-2000 <input type="checkbox"/>                                                                                                                                              | Heidelberg OCT1 <input type="checkbox"/>                              |                                                                                    |
|                                               | Other <input type="checkbox"/>                                                                                                                                                           |                                                                       |                                                                                    |
| <i>If other specify</i>                       |                                                                                                                                                                                          |                                                                       |                                                                                    |
|                                               | Right Eye                                                                                                                                                                                | Left eye                                                              |                                                                                    |
| Visual acuity (ETDRS)                         | (ETDRS letters, range 0-95) <input type="text"/> <input type="text"/>                                                                                                                    | (ETDRS letters, range 0-95) <input type="text"/> <input type="text"/> |                                                                                    |
| Visual acuity (Snellen)                       | <input type="text"/> / <input type="text"/> <input type="text"/>                                                                                                                         | <input type="text"/> / <input type="text"/> <input type="text"/>      |                                                                                    |
| Diagnosis by the Optometrist                  | Yes No                                                                                                                                                                                   | Yes No                                                                |                                                                                    |
|                                               | Wet AMD                                                                                                                                                                                  | <input type="checkbox"/> <input type="checkbox"/>                     | Wet AMD <input type="checkbox"/> <input type="checkbox"/>                          |
|                                               | Dry AMD                                                                                                                                                                                  | <input type="checkbox"/> <input type="checkbox"/>                     | Dry AMD <input type="checkbox"/> <input type="checkbox"/>                          |
|                                               | Central Serous Chorioretinopathy                                                                                                                                                         | <input type="checkbox"/> <input type="checkbox"/>                     | Central Serous Chorioretinopathy <input type="checkbox"/> <input type="checkbox"/> |
|                                               | Central Retinal Vein Occlusion                                                                                                                                                           | <input type="checkbox"/> <input type="checkbox"/>                     | Central Retinal Vein Occlusion <input type="checkbox"/> <input type="checkbox"/>   |
|                                               | Branch Retinal Vein Occlusion                                                                                                                                                            | <input type="checkbox"/> <input type="checkbox"/>                     | Branch Retinal Vein Occlusion <input type="checkbox"/> <input type="checkbox"/>    |
|                                               | Diabetic Macular Oedema                                                                                                                                                                  | <input type="checkbox"/> <input type="checkbox"/>                     | Diabetic Macular Oedema <input type="checkbox"/> <input type="checkbox"/>          |
|                                               | Inherited Eye Disease                                                                                                                                                                    | <input type="checkbox"/> <input type="checkbox"/>                     | Inherited Eye Disease <input type="checkbox"/> <input type="checkbox"/>            |
|                                               | Other                                                                                                                                                                                    | <input type="checkbox"/> <input type="checkbox"/>                     | Other <input type="checkbox"/> <input type="checkbox"/>                            |
|                                               | <i>If other specify</i>                                                                                                                                                                  |                                                                       |                                                                                    |
| Clinical findings                             | Yes No                                                                                                                                                                                   | Yes No                                                                |                                                                                    |
|                                               | Macular Haemorrhage                                                                                                                                                                      | <input type="checkbox"/> <input type="checkbox"/>                     | Macular Haemorrhage <input type="checkbox"/> <input type="checkbox"/>              |
|                                               | Other Retinal Haemorrhage                                                                                                                                                                | <input type="checkbox"/> <input type="checkbox"/>                     | Other Retinal Haemorrhage <input type="checkbox"/> <input type="checkbox"/>        |
|                                               | Exudates                                                                                                                                                                                 | <input type="checkbox"/> <input type="checkbox"/>                     | Exudates <input type="checkbox"/> <input type="checkbox"/>                         |
|                                               | Disc Swelling                                                                                                                                                                            | <input type="checkbox"/> <input type="checkbox"/>                     | Disc Swelling <input type="checkbox"/> <input type="checkbox"/>                    |
|                                               | Macular Atrophy                                                                                                                                                                          | <input type="checkbox"/> <input type="checkbox"/>                     | Macular Atrophy <input type="checkbox"/> <input type="checkbox"/>                  |
|                                               | Cotton Wool Spot                                                                                                                                                                         | <input type="checkbox"/> <input type="checkbox"/>                     | Cotton Wool Spot <input type="checkbox"/> <input type="checkbox"/>                 |
|                                               | Other                                                                                                                                                                                    | <input type="checkbox"/> <input type="checkbox"/>                     | Other <input type="checkbox"/> <input type="checkbox"/>                            |
| <i>If other specify</i>                       |                                                                                                                                                                                          |                                                                       |                                                                                    |

Study No:   -

**HERMES Study**

**BASELINE VISIT (Community Optometry)**

**Page 2/2**

| ALL FIELDS ARE MANDATORY                           |                                                                                                                         |                                                                                                                         |
|----------------------------------------------------|-------------------------------------------------------------------------------------------------------------------------|-------------------------------------------------------------------------------------------------------------------------|
| Baseline Exam                                      | Right Eye                                                                                                               | Left eye                                                                                                                |
| Intraocular pressure                               | (0-60) <input type="text"/> <input type="text"/>                                                                        | (0-60) <input type="text"/> <input type="text"/>                                                                        |
| OCT taken?                                         | Yes <input type="checkbox"/> No <input type="checkbox"/>                                                                | Yes <input type="checkbox"/> No <input type="checkbox"/>                                                                |
| <i>OCT qualitative</i>                             | SRF <input type="checkbox"/> IRF <input type="checkbox"/><br>PED <input type="checkbox"/> SHRM <input type="checkbox"/> | SRF <input type="checkbox"/> IRF <input type="checkbox"/><br>PED <input type="checkbox"/> SHRM <input type="checkbox"/> |
| Referral Recommendation by Optometrist (both arms) | Urgent <input type="checkbox"/>                                                                                         | Routine <input type="checkbox"/> No referral <input type="checkbox"/>                                                   |
| <i>If not referred, specify reason</i>             |                                                                                                                         |                                                                                                                         |

Comments:

For peer review only

**I have completed this form in full and take full responsibility for any missing data.**

|                                                  |               |                                                                                                                                                                             |
|--------------------------------------------------|---------------|-----------------------------------------------------------------------------------------------------------------------------------------------------------------------------|
| <b>Signed:</b>                                   | <b>Print:</b> | <b>Date:</b>                                                                                                                                                                |
|                                                  |               | <input type="text"/> <input type="text"/> / <input type="text"/> <input type="text"/> / <input type="text"/> <input type="text"/> <input type="text"/> <input type="text"/> |
| <b>Office use only, data entry completed by:</b> |               |                                                                                                                                                                             |
| <b>Signed:</b>                                   | <b>Print:</b> | <b>Date:</b>                                                                                                                                                                |
|                                                  |               | <input type="text"/> <input type="text"/> / <input type="text"/> <input type="text"/> / <input type="text"/> <input type="text"/> <input type="text"/> <input type="text"/> |

Study No:   -

**HERMES Study**

REFERRALS (Community Optometry)

Page 1/3

| ALL FIELDS ARE MANDATORY                                                            |                                                                                                                                                                                          |
|-------------------------------------------------------------------------------------|------------------------------------------------------------------------------------------------------------------------------------------------------------------------------------------|
| <b>Referral Details</b>                                                             |                                                                                                                                                                                          |
| Has referral been generated?                                                        | (control arm) Yes <input type="checkbox"/> No <input type="checkbox"/>                                                                                                                   |
| <i>If yes please specify date</i>                                                   | (dd mm yyyy) <input type="text"/> <input type="text"/> / <input type="text"/> <input type="text"/> / <input type="text"/> <input type="text"/> <input type="text"/> <input type="text"/> |
| Referral reference number                                                           | (control arm)                                                                                                                                                                            |
| Referral system                                                                     | (control arm) Post <input type="checkbox"/> Electronic <input type="checkbox"/> Other <input type="checkbox"/>                                                                           |
| <i>If other, please specify</i>                                                     |                                                                                                                                                                                          |
| Have OCT scans been uploaded on eCRF?                                               | (both arms) Yes <input type="checkbox"/> No <input type="checkbox"/>                                                                                                                     |
| <i>If no, specify reason</i>                                                        |                                                                                                                                                                                          |
| Has clinical data been uploaded on eCRF?                                            | (intervention arm) Yes <input type="checkbox"/> No <input type="checkbox"/>                                                                                                              |
| <i>If no, specify reason</i>                                                        |                                                                                                                                                                                          |
| Optometrist referral recommendation accepted after HES triage?                      | (both arms) Yes <input type="checkbox"/> No <input type="checkbox"/>                                                                                                                     |
| <i>If yes, eye on which referral decision was based</i>                             | Right <input type="checkbox"/> Left <input type="checkbox"/> Both <input type="checkbox"/>                                                                                               |
| <i>If no, referral decision after HES triage</i>                                    | Urgent <input type="checkbox"/> Routine <input type="checkbox"/> No referral <input type="checkbox"/>                                                                                    |
| <i>Reason why recommendation was not accepted</i><br>(field to be completed by HES) |                                                                                                                                                                                          |



**HERMES Study**

REFERRALS (tele-HES)

| ALL FIELDS ARE MANDATORY                                          |                                                                                                                         |                                                                                                                         |
|-------------------------------------------------------------------|-------------------------------------------------------------------------------------------------------------------------|-------------------------------------------------------------------------------------------------------------------------|
| <b>Tele - HES Review</b>                                          |                                                                                                                         |                                                                                                                         |
| OCT from referral reviewed by tele-HES?                           | Yes <input type="checkbox"/>                                                                                            | No <input type="checkbox"/>                                                                                             |
|                                                                   | <b>Right Eye</b>                                                                                                        | <b>Left eye</b>                                                                                                         |
| OCT from referral <i>qualitative by tele-HES</i>                  | SRF <input type="checkbox"/> IRF <input type="checkbox"/><br>PED <input type="checkbox"/> SHRM <input type="checkbox"/> | SRF <input type="checkbox"/> IRF <input type="checkbox"/><br>PED <input type="checkbox"/> SHRM <input type="checkbox"/> |
| Clinical findings                                                 | Yes No                                                                                                                  | Yes No                                                                                                                  |
|                                                                   | Macular Haemorrhage <input type="checkbox"/> <input type="checkbox"/>                                                   | Macular Haemorrhage <input type="checkbox"/> <input type="checkbox"/>                                                   |
|                                                                   | Other Retinal Haemorrhage <input type="checkbox"/> <input type="checkbox"/>                                             | Other Retinal Haemorrhage <input type="checkbox"/> <input type="checkbox"/>                                             |
|                                                                   | Exudates <input type="checkbox"/> <input type="checkbox"/>                                                              | Exudates <input type="checkbox"/> <input type="checkbox"/>                                                              |
|                                                                   | Disc Swelling <input type="checkbox"/> <input type="checkbox"/>                                                         | Disc Swelling <input type="checkbox"/> <input type="checkbox"/>                                                         |
|                                                                   | Macular Atrophy <input type="checkbox"/> <input type="checkbox"/>                                                       | Macular Atrophy <input type="checkbox"/> <input type="checkbox"/>                                                       |
|                                                                   | Cotton Wool Spot <input type="checkbox"/> <input type="checkbox"/>                                                      | Cotton Wool Spot <input type="checkbox"/> <input type="checkbox"/>                                                      |
|                                                                   | Other <input type="checkbox"/> <input type="checkbox"/>                                                                 | Other <input type="checkbox"/> <input type="checkbox"/>                                                                 |
| <i>If other specify</i>                                           |                                                                                                                         |                                                                                                                         |
| <b>Tele-HES Review</b>                                            |                                                                                                                         |                                                                                                                         |
|                                                                   | <b>Right Eye</b>                                                                                                        | <b>Left eye</b>                                                                                                         |
| <i>Diagnosis from referring optometrist confirmed by tele-HES</i> | Yes <input type="checkbox"/> No <input type="checkbox"/>                                                                |                                                                                                                         |
| Diagnosis by tele-HES                                             | Yes No                                                                                                                  | Yes No                                                                                                                  |
|                                                                   | Wet AMD <input type="checkbox"/> <input type="checkbox"/>                                                               | Wet AMD <input type="checkbox"/> <input type="checkbox"/>                                                               |
|                                                                   | Dry AMD <input type="checkbox"/> <input type="checkbox"/>                                                               | Dry AMD <input type="checkbox"/> <input type="checkbox"/>                                                               |
|                                                                   | Central Serous Chorioretinopathy <input type="checkbox"/> <input type="checkbox"/>                                      | Central Serous Chorioretinopathy <input type="checkbox"/> <input type="checkbox"/>                                      |
|                                                                   | Central Retinal Vein Occlusion <input type="checkbox"/> <input type="checkbox"/>                                        | Central Retinal Vein Occlusion <input type="checkbox"/> <input type="checkbox"/>                                        |
|                                                                   | Branch Retinal Vein Occlusion <input type="checkbox"/> <input type="checkbox"/>                                         | Branch Retinal Vein Occlusion <input type="checkbox"/> <input type="checkbox"/>                                         |
|                                                                   | Diabetic Macular Oedema <input type="checkbox"/> <input type="checkbox"/>                                               | Diabetic Macular Oedema <input type="checkbox"/> <input type="checkbox"/>                                               |
|                                                                   | Inherited Eye Disease <input type="checkbox"/> <input type="checkbox"/>                                                 | Inherited Eye Disease <input type="checkbox"/> <input type="checkbox"/>                                                 |
|                                                                   | Other <input type="checkbox"/> <input type="checkbox"/>                                                                 | Other <input type="checkbox"/> <input type="checkbox"/>                                                                 |
|                                                                   | <i>If other specify</i>                                                                                                 |                                                                                                                         |

Study No:   -

**HERMES Study**

REFERRALS (tele-HES)

Page 3/3

**ALL FIELDS ARE MANDATORY**

|                                                                                                                                                                           |                                 |                                  |                                      |
|---------------------------------------------------------------------------------------------------------------------------------------------------------------------------|---------------------------------|----------------------------------|--------------------------------------|
| <b>Tele - HES Review</b>                                                                                                                                                  |                                 |                                  |                                      |
| Referral recommendation by referring optometrist confirmed by tele-HES<br><i>If yes, eye on which referral decision was based</i><br><i>Referral Decision by tele-HES</i> | Yes <input type="checkbox"/>    |                                  | No <input type="checkbox"/>          |
|                                                                                                                                                                           | Right <input type="checkbox"/>  | Left <input type="checkbox"/>    | Both <input type="checkbox"/>        |
|                                                                                                                                                                           | Urgent <input type="checkbox"/> | Routine <input type="checkbox"/> | No referral <input type="checkbox"/> |

Comments:

**I have completed this form in full and take full responsibility for any missing data.**

|                                                  |               |                                                                                                                                                                             |
|--------------------------------------------------|---------------|-----------------------------------------------------------------------------------------------------------------------------------------------------------------------------|
| <b>Signed:</b>                                   | <b>Print:</b> | <b>Date:</b>                                                                                                                                                                |
|                                                  |               | <input type="text"/> <input type="text"/> / <input type="text"/> <input type="text"/> / <input type="text"/> <input type="text"/> <input type="text"/> <input type="text"/> |
| <b>Office use only, data entry completed by:</b> |               |                                                                                                                                                                             |
| <b>Signed:</b>                                   | <b>Print:</b> | <b>Date:</b>                                                                                                                                                                |
|                                                  |               | <input type="text"/> <input type="text"/> / <input type="text"/> <input type="text"/> / <input type="text"/> <input type="text"/> <input type="text"/> <input type="text"/> |

Study No:   -

**HERMES Study**  
 HES First Visit

| ALL FIELDS ARE MANDATORY                                |                                                                                                                                                                                          |                                                                                       |
|---------------------------------------------------------|------------------------------------------------------------------------------------------------------------------------------------------------------------------------------------------|---------------------------------------------------------------------------------------|
| HES Review                                              |                                                                                                                                                                                          |                                                                                       |
| Follow up status                                        | Attended <input type="checkbox"/>                                                                                                                                                        | Cancelled <input type="checkbox"/> DNA <input type="checkbox"/>                       |
| Date of consultation                                    | (dd mm yyyy) <input type="text"/> <input type="text"/> / <input type="text"/> <input type="text"/> / <input type="text"/> <input type="text"/> <input type="text"/> <input type="text"/> |                                                                                       |
| Change in eye medication                                | Yes <input type="checkbox"/> No <input type="checkbox"/>                                                                                                                                 |                                                                                       |
| If yes, specify                                         |                                                                                                                                                                                          |                                                                                       |
| Date of first treatment (if applicable)                 | (dd mm yyyy) <input type="text"/> <input type="text"/> / <input type="text"/> <input type="text"/> / <input type="text"/> <input type="text"/> <input type="text"/> <input type="text"/> |                                                                                       |
|                                                         | Right Eye                                                                                                                                                                                | Left eye                                                                              |
| Intraocular pressure                                    | (0-60) <input type="text"/> <input type="text"/>                                                                                                                                         | (0-60) <input type="text"/> <input type="text"/>                                      |
| OCT taken?                                              | Yes <input type="checkbox"/> No <input type="checkbox"/>                                                                                                                                 | Yes <input type="checkbox"/> No <input type="checkbox"/>                              |
| OCT qualitative                                         | SRF <input type="checkbox"/> IRF <input type="checkbox"/>                                                                                                                                | SRF <input type="checkbox"/> IRF <input type="checkbox"/>                             |
|                                                         | PED <input type="checkbox"/> SHRM <input type="checkbox"/>                                                                                                                               | PED <input type="checkbox"/> SHRM <input type="checkbox"/>                            |
| Visual acuity (ETDRS)                                   | (ETDRS letters, range 0-95) <input type="text"/> <input type="text"/>                                                                                                                    | (ETDRS letters, range 0-95) <input type="text"/> <input type="text"/>                 |
| Visual acuity (Snellen)                                 | <input type="text"/> / <input type="text"/> <input type="text"/> <input type="text"/>                                                                                                    | <input type="text"/> / <input type="text"/> <input type="text"/> <input type="text"/> |
| Clinical findings by HES                                | Yes No                                                                                                                                                                                   | Yes No                                                                                |
|                                                         | Macular Haemorrhage <input type="checkbox"/> <input type="checkbox"/>                                                                                                                    | Macular Haemorrhage <input type="checkbox"/> <input type="checkbox"/>                 |
|                                                         | Other Retinal Haemorrhage <input type="checkbox"/> <input type="checkbox"/>                                                                                                              | Other Retinal Haemorrhage <input type="checkbox"/> <input type="checkbox"/>           |
|                                                         | Exudates <input type="checkbox"/> <input type="checkbox"/>                                                                                                                               | Exudates <input type="checkbox"/> <input type="checkbox"/>                            |
|                                                         | Disc Swelling <input type="checkbox"/> <input type="checkbox"/>                                                                                                                          | Disc Swelling <input type="checkbox"/> <input type="checkbox"/>                       |
|                                                         | Macular Atrophy <input type="checkbox"/> <input type="checkbox"/>                                                                                                                        | Macular Atrophy <input type="checkbox"/> <input type="checkbox"/>                     |
|                                                         | Cotton Wool Spot <input type="checkbox"/> <input type="checkbox"/>                                                                                                                       | Cotton Wool Spot <input type="checkbox"/> <input type="checkbox"/>                    |
| Other <input type="checkbox"/> <input type="checkbox"/> | Other <input type="checkbox"/> <input type="checkbox"/>                                                                                                                                  |                                                                                       |
| If other specify                                        |                                                                                                                                                                                          |                                                                                       |
| Diagnosis by HES                                        | Yes No                                                                                                                                                                                   | Yes No                                                                                |
|                                                         | Wet AMD <input type="checkbox"/> <input type="checkbox"/>                                                                                                                                | Wet AMD <input type="checkbox"/> <input type="checkbox"/>                             |
|                                                         | Dry AMD <input type="checkbox"/> <input type="checkbox"/>                                                                                                                                | Dry AMD <input type="checkbox"/> <input type="checkbox"/>                             |
|                                                         | Central Serous Chorioretinopathy <input type="checkbox"/> <input type="checkbox"/>                                                                                                       | Central Serous Chorioretinopathy <input type="checkbox"/> <input type="checkbox"/>    |
|                                                         | Central Retinal Vein Occlusion <input type="checkbox"/> <input type="checkbox"/>                                                                                                         | Central Retinal Vein Occlusion <input type="checkbox"/> <input type="checkbox"/>      |
|                                                         | Branch Retinal Vein Occlusion <input type="checkbox"/> <input type="checkbox"/>                                                                                                          | Branch Retinal Vein Occlusion <input type="checkbox"/> <input type="checkbox"/>       |
|                                                         | Diabetic Macular Oedema <input type="checkbox"/> <input type="checkbox"/>                                                                                                                | Diabetic Macular Oedema <input type="checkbox"/> <input type="checkbox"/>             |
|                                                         | Inherited Eye Disease <input type="checkbox"/> <input type="checkbox"/>                                                                                                                  | Inherited Eye Disease <input type="checkbox"/> <input type="checkbox"/>               |
|                                                         | Other <input type="checkbox"/> <input type="checkbox"/>                                                                                                                                  | Other <input type="checkbox"/> <input type="checkbox"/>                               |
| If other specify                                        |                                                                                                                                                                                          |                                                                                       |

Study No:   -

**HERMES Study**

HES First Visit

Page 2/2

| ALL FIELDS ARE MANDATORY         |                                                                     |                                                                     |
|----------------------------------|---------------------------------------------------------------------|---------------------------------------------------------------------|
| HES Review                       | Right Eye                                                           | Left eye                                                            |
|                                  | Yes No                                                              | Yes No                                                              |
| Additional Diagnostic Procedures | OCT - Angio <input type="checkbox"/> <input type="checkbox"/>       | OCT - Angio <input type="checkbox"/> <input type="checkbox"/>       |
|                                  | IGCA <input type="checkbox"/> <input type="checkbox"/>              | IGCA <input type="checkbox"/> <input type="checkbox"/>              |
|                                  | FA <input type="checkbox"/> <input type="checkbox"/>                | FA <input type="checkbox"/> <input type="checkbox"/>                |
|                                  | Optos <input type="checkbox"/> <input type="checkbox"/>             | Optos <input type="checkbox"/> <input type="checkbox"/>             |
|                                  | Ultrasound B Scan <input type="checkbox"/> <input type="checkbox"/> | Ultrasound B Scan <input type="checkbox"/> <input type="checkbox"/> |
|                                  | Visual Field Test <input type="checkbox"/> <input type="checkbox"/> | Visual Field Test <input type="checkbox"/> <input type="checkbox"/> |
|                                  | Other <input type="checkbox"/> <input type="checkbox"/>             | Other <input type="checkbox"/> <input type="checkbox"/>             |
| If other specify                 |                                                                     |                                                                     |

Comments:

**I have completed this form in full and take full responsibility for any missing data.**

|                                                  |               |                                                                                                                                                                             |
|--------------------------------------------------|---------------|-----------------------------------------------------------------------------------------------------------------------------------------------------------------------------|
| <b>Signed:</b>                                   | <b>Print:</b> | <b>Date:</b>                                                                                                                                                                |
|                                                  |               | <input type="text"/> <input type="text"/> / <input type="text"/> <input type="text"/> / <input type="text"/> <input type="text"/> <input type="text"/> <input type="text"/> |
| <b>Office use only, data entry completed by:</b> |               |                                                                                                                                                                             |
| <b>Signed:</b>                                   | <b>Print:</b> | <b>Date:</b>                                                                                                                                                                |
|                                                  |               | <input type="text"/> <input type="text"/> / <input type="text"/> <input type="text"/> / <input type="text"/> <input type="text"/> <input type="text"/> <input type="text"/> |

Study No:   -

**HERMES Study**  
 READING CENTRE

| ALL FIELDS ARE MANDATORY                    |                                                                                    |                                                                                    |
|---------------------------------------------|------------------------------------------------------------------------------------|------------------------------------------------------------------------------------|
| Reference Standard                          | Right Eye                                                                          | Left eye                                                                           |
| Diagnosis by the reference standard         | Yes No                                                                             | Yes No                                                                             |
|                                             | Wet AMD <input type="checkbox"/> <input type="checkbox"/>                          | Wet AMD <input type="checkbox"/> <input type="checkbox"/>                          |
|                                             | Dry AMD <input type="checkbox"/> <input type="checkbox"/>                          | Dry AMD <input type="checkbox"/> <input type="checkbox"/>                          |
|                                             | Central Serous Chorioretinopathy <input type="checkbox"/> <input type="checkbox"/> | Central Serous Chorioretinopathy <input type="checkbox"/> <input type="checkbox"/> |
|                                             | Central Retinal Vein Occlusion <input type="checkbox"/> <input type="checkbox"/>   | Central Retinal Vein Occlusion <input type="checkbox"/> <input type="checkbox"/>   |
|                                             | Branch Retinal Vein Occlusion <input type="checkbox"/> <input type="checkbox"/>    | Branch Retinal Vein Occlusion <input type="checkbox"/> <input type="checkbox"/>    |
|                                             | Diabetic Macular Oedema <input type="checkbox"/> <input type="checkbox"/>          | Diabetic Macular Oedema <input type="checkbox"/> <input type="checkbox"/>          |
|                                             | Inherited Eye Disease <input type="checkbox"/> <input type="checkbox"/>            | Inherited Eye Disease <input type="checkbox"/> <input type="checkbox"/>            |
|                                             | Other <input type="checkbox"/> <input type="checkbox"/>                            | Other <input type="checkbox"/> <input type="checkbox"/>                            |
|                                             | If other specify                                                                   |                                                                                    |
| Referral decision by reference standard     | Urgent <input type="checkbox"/>                                                    | Routine <input type="checkbox"/> No referral <input type="checkbox"/>              |
| Artificial Intelligence Moorfields DeepMind | Right Eye                                                                          | Left eye                                                                           |
| Deep-Mind Diagnosis of retinal disease      | Yes No                                                                             | Yes No                                                                             |
|                                             | Wet AMD <input type="checkbox"/> <input type="checkbox"/>                          | Wet AMD <input type="checkbox"/> <input type="checkbox"/>                          |
|                                             | Dry AMD <input type="checkbox"/> <input type="checkbox"/>                          | Dry AMD <input type="checkbox"/> <input type="checkbox"/>                          |
|                                             | Central Serous Chorioretinopathy <input type="checkbox"/> <input type="checkbox"/> | Central Serous Chorioretinopathy <input type="checkbox"/> <input type="checkbox"/> |
|                                             | Central Retinal Vein Occlusion <input type="checkbox"/> <input type="checkbox"/>   | Central Retinal Vein Occlusion <input type="checkbox"/> <input type="checkbox"/>   |
|                                             | Branch Retinal Vein Occlusion <input type="checkbox"/> <input type="checkbox"/>    | Branch Retinal Vein Occlusion <input type="checkbox"/> <input type="checkbox"/>    |
|                                             | Diabetic Macular Oedema <input type="checkbox"/> <input type="checkbox"/>          | Diabetic Macular Oedema <input type="checkbox"/> <input type="checkbox"/>          |
|                                             | Inherited Eye Disease <input type="checkbox"/> <input type="checkbox"/>            | Inherited Eye Disease <input type="checkbox"/> <input type="checkbox"/>            |
|                                             | Other <input type="checkbox"/> <input type="checkbox"/>                            | Other <input type="checkbox"/> <input type="checkbox"/>                            |
|                                             | If other specify                                                                   |                                                                                    |
| Referral decision by Moorfields DeepMind    | Urgent <input type="checkbox"/>                                                    | Routine <input type="checkbox"/> No referral <input type="checkbox"/>              |

Study No:   -

**HERMES Study**  
 READING CENTRE

| ALL FIELDS ARE MANDATORY                                                     |                                                          |
|------------------------------------------------------------------------------|----------------------------------------------------------|
| <b>Artificial Intelligence Moorfields-DeepMind</b>                           |                                                          |
| Time from receiving the OCT scans and a referral decision (hours)            | (hours) <input type="text"/> <input type="text"/>        |
| End-to-end inference speed of technical infrastructure supporting the AI DSS | (minutes) <input type="text"/> <input type="text"/>      |
| Any technical issues                                                         | Yes <input type="checkbox"/> No <input type="checkbox"/> |
| If yes, specify details                                                      |                                                          |

Comments:

For peer review only

**I have completed this form in full and take full responsibility for any missing data.**

|                                                  |               |                                                                                                                                                                             |
|--------------------------------------------------|---------------|-----------------------------------------------------------------------------------------------------------------------------------------------------------------------------|
| <b>Signed:</b>                                   | <b>Print:</b> | <b>Date:</b>                                                                                                                                                                |
|                                                  |               | <input type="text"/> <input type="text"/> / <input type="text"/> <input type="text"/> / <input type="text"/> <input type="text"/> <input type="text"/> <input type="text"/> |
| <b>Office use only, data entry completed by:</b> |               |                                                                                                                                                                             |
| <b>Signed:</b>                                   | <b>Print:</b> | <b>Date:</b>                                                                                                                                                                |
|                                                  |               | <input type="text"/> <input type="text"/> / <input type="text"/> <input type="text"/> / <input type="text"/> <input type="text"/> <input type="text"/> <input type="text"/> |

Study No:   -

**HERMES Study**

**APPENDIX 1 – PROTOCOL DEVIATION**

| ALL FIELDS ARE MANDATORY |                                                                                                                                                                                          |
|--------------------------|------------------------------------------------------------------------------------------------------------------------------------------------------------------------------------------|
| <b>Deviation Details</b> |                                                                                                                                                                                          |
| Deviation date           | (dd mm yyyy) <input type="text"/> <input type="text"/> / <input type="text"/> <input type="text"/> / <input type="text"/> <input type="text"/> <input type="text"/> <input type="text"/> |
| Type of deviation        |                                                                                                                                                                                          |
| Any outcomes or actions  |                                                                                                                                                                                          |
| Deviation date           | (dd mm yyyy) <input type="text"/> <input type="text"/> / <input type="text"/> <input type="text"/> / <input type="text"/> <input type="text"/> <input type="text"/> <input type="text"/> |
| Type of deviation        |                                                                                                                                                                                          |
| Any outcomes or actions  |                                                                                                                                                                                          |
| Deviation date           | (dd mm yyyy) <input type="text"/> <input type="text"/> / <input type="text"/> <input type="text"/> / <input type="text"/> <input type="text"/> <input type="text"/> <input type="text"/> |
| Type of deviation        |                                                                                                                                                                                          |
| Any outcomes or actions  |                                                                                                                                                                                          |
| Deviation date           | (dd mm yyyy) <input type="text"/> <input type="text"/> / <input type="text"/> <input type="text"/> / <input type="text"/> <input type="text"/> <input type="text"/> <input type="text"/> |
| Type of deviation        |                                                                                                                                                                                          |
| Any outcomes or actions  |                                                                                                                                                                                          |

**I have completed this form in full and take full responsibility for any missing data.**

|                                                  |               |                                                                                                                                                                             |
|--------------------------------------------------|---------------|-----------------------------------------------------------------------------------------------------------------------------------------------------------------------------|
| <b>Signed:</b>                                   | <b>Print:</b> | <b>Date:</b>                                                                                                                                                                |
|                                                  |               | <input type="text"/> <input type="text"/> / <input type="text"/> <input type="text"/> / <input type="text"/> <input type="text"/> <input type="text"/> <input type="text"/> |
| <b>Office use only, data entry completed by:</b> |               |                                                                                                                                                                             |
| <b>Signed:</b>                                   | <b>Print:</b> | <b>Date:</b>                                                                                                                                                                |
|                                                  |               | <input type="text"/> <input type="text"/> / <input type="text"/> <input type="text"/> / <input type="text"/> <input type="text"/> <input type="text"/> <input type="text"/> |

Study No:   -

**HERMES Study**

**APPENDIX 2 – EARLY STUDY WITHDRAWAL**

| ALL FIELDS ARE MANDATORY                                                                                        |                                                                                                                                                                                          |
|-----------------------------------------------------------------------------------------------------------------|------------------------------------------------------------------------------------------------------------------------------------------------------------------------------------------|
| Withdrawal Details                                                                                              |                                                                                                                                                                                          |
| Did the patients discontinue the trial prematurely for reasons other than being referred back to hospital care? | Yes <input type="checkbox"/> No <input type="checkbox"/>                                                                                                                                 |
| Date of premature Study Discontinuation                                                                         | (dd mm yyyy) <input type="text"/> <input type="text"/> / <input type="text"/> <input type="text"/> / <input type="text"/> <input type="text"/> <input type="text"/> <input type="text"/> |
| Primary reason for discontinuation<br><i>(tick one box only)</i>                                                | Patient withdraws consent <input type="checkbox"/><br><i>If known, state reason:</i>                                                                                                     |
|                                                                                                                 | Patient is non-compliant <input type="checkbox"/>                                                                                                                                        |
|                                                                                                                 | Patient is lost to follow up <input type="checkbox"/>                                                                                                                                    |
|                                                                                                                 | Investigator feels that it is in the patient's best interest due to adverse event <input type="checkbox"/><br><i>Related AE No:</i>                                                      |
|                                                                                                                 | Other reason for discontinuation <input type="checkbox"/><br><i>If Other specify:</i>                                                                                                    |
| Does the patient still agree to have their data collected and analysed as part of intent to treat analysis?     | Yes <input type="checkbox"/> No <input type="checkbox"/>                                                                                                                                 |

**I have completed this form in full and take full responsibility for any missing data.**

| <b>Signed:</b>                            | <b>Print:</b>        | <b>Date:</b>                                                                                                                                                                |
|-------------------------------------------|----------------------|-----------------------------------------------------------------------------------------------------------------------------------------------------------------------------|
| <input type="text"/>                      | <input type="text"/> | <input type="text"/> <input type="text"/> / <input type="text"/> <input type="text"/> / <input type="text"/> <input type="text"/> <input type="text"/> <input type="text"/> |
| Office use only, data entry completed by: |                      |                                                                                                                                                                             |
| <b>Signed:</b>                            | <b>Print:</b>        | <b>Date:</b>                                                                                                                                                                |
| <input type="text"/>                      | <input type="text"/> | <input type="text"/> <input type="text"/> / <input type="text"/> <input type="text"/> / <input type="text"/> <input type="text"/> <input type="text"/> <input type="text"/> |



## Appendix 6. Trial Documents and Subject Records

### 6.1 CRFs and Source Document Identification

We will establish a hub and spoke structure, where each community optometry practice liaises with its local hospital site (Moorfields Eye Hospital NHS Foundation Trust, Birmingham University Hospitals NHS Foundation Trust, Central Middlesex Hospital at London North West University Healthcare NHS Trust, and North West Anglia NHS Foundation Trust) for the day-to-day operation of the trial, through the site coordinator located at each site. 8-10 optometry practices will be located in the catchment area of Moorfields Eye Hospital NHS Foundation Trust (4-5 control and 4-5 intervention), 4-6 in the catchment area of North West London NHS Foundation Trust (Central Middlesex Hospital) (2-3 control and 2-3 intervention), 4-6 in the catchment area of North West Anglia NHS Foundation Trust (2-3 control and 2-3 intervention) and 4-6 in the catchment area of Birmingham University Hospitals NHS Foundation Trust (2-3 control and 2-3 intervention). All sites, including community optometry and hospital sites transfer data (OCT and clinical data) to Moorfields Reading Centre. The digital referral platform will be used in the 12 intervention optometry practices and the 4 HES; OCTs and clinical data from patients in the intervention optometry practices will be transferred to HES via a digital referral platform for remote review ('tele-HES') by local human experts.

Both the control arm and interventional arm will use the trial database to complete the eCRF and securely upload OCT scans. The interventional arm also transfers OCT's to the patient's hub hospital via a secure tele-ophthalmology platform. The scans and data will then be matched with the relevant trial data in the eCRF database.

For the AI Diagnostic Accuracy study, the pseudonymised OCT scans will be securely transmitted from the Moorfields Reading Centre to a secure Google Cloud Healthcare DICOM store over an encrypted connection, where it will be analysed by the DeepMind algorithm. Results from this analysis will be logged in the eCRF database. The study's use of cloud computing infrastructure adheres to January 2018 guidance from NHS Digital regarding cloud computing for health and social care. All data will be handled in accordance with the Data Protection Act 2018.

### 6.2 Confidentiality of Trial Documents and Subject Records

The eCRF will not bear the subject's name or other personal identifiable data. A trial number will be used for identification on the CRFs. A separate log file which links the study ID and the patient's details, screening log and recruitment information will be kept on a protected NHS computer at hub sites. The key log will be kept at the recruitment site and will not be shared with the Sponsor. It will be the responsibility of the chief investigator or delegated trial member to ensure the accuracy of all data recorded on the CRFs. CRFs will be completed and signed off by the Chief Investigator or delegated/authorised individual as outlined in the delegation log, the completed CRFs will be checked for accuracy and completion by the trial co-ordinator prior to data entry.

### 6.3 Procedures for validation and securing of electronic clinical data systems

The eCRF will be developed by the Moorfields Eye Hospital database development team. The front end will use a bespoke web application and the back end (data storage) will be hosted on Moorfields Eye Hospital Research Database SQL servers. All servers are backed up daily and with multiple restore points every day and backup copies exist in more than one All MEH clinical trial databases are part of the MEH disaster recovery strategy and have a 5 day Recovery Time Objective.

### 6.4 Data handling and record keeping

Data queries will be sent to trial co-ordinators for clarification and confirmation whenever picked up. After all data queries are resolved and all errors are corrected, the database will then be locked with the agreement of King's CTU statistician and data will be exported by the applications manager and sent to trial statistician for data analysis. Pre-existing mechanisms for data transfer between Moorfields Eye Hospital CRF and King's CTU will be utilised.

## Appendix 7. References

- 1 Kortuem K, Fasler K, Charnley A, et al. Implementation of medical retina virtual clinics in a tertiary eye care referral centre. *British Journal of Ophthalmology* 2018;102(10):1391-1395.
- 2 Agresti A and Coull B. Approximate is Better than “Exact” for Interval Estimation of Binomial Proportions. *The American Statistician* 1998;52(2):119-126.
- 3 Day A, Burr J, Bunce C, et al. Randomised, single-masked non-inferiority trial of femtosecond laser-assisted versus manual phacoemulsification cataract surgery for adults with visually significant cataract: the FACT trial protocol. *BMJ Open* 2015;5(11):p.e010381.
- 4 Theodossiades J, Murdoch I, and Cousens S. Glaucoma case finding: a cluster-randomised intervention trial. *Eye* 2004;18(5):483-490.
- 5 De Fauw J, Ledsam J, Romera-Paredes B, et al. Clinically applicable deep learning for diagnosis and referral in retinal disease. *Nature Medicine* 2018;24(9):1342-1350.

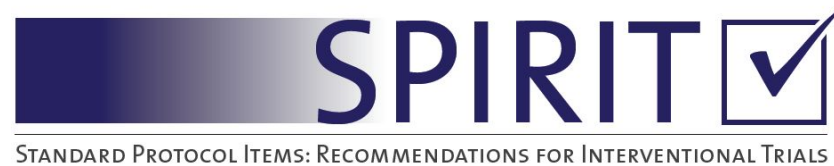

SPIRIT 2013 Checklist: Recommended items to address in a clinical trial protocol and related documents\*

| Section/item                      | Item No | Description                                                                                                                                                                                                                                                                              | Addressed on page number |
|-----------------------------------|---------|------------------------------------------------------------------------------------------------------------------------------------------------------------------------------------------------------------------------------------------------------------------------------------------|--------------------------|
| <b>Administrative information</b> |         |                                                                                                                                                                                                                                                                                          |                          |
| Title                             | 1       | Descriptive title identifying the study design, population, interventions, and, if applicable, trial acronym                                                                                                                                                                             | 1                        |
| Trial registration                | 2a      | Trial identifier and registry name. If not yet registered, name of intended registry                                                                                                                                                                                                     | 2                        |
|                                   | 2b      | All items from the World Health Organization Trial Registration Data Set                                                                                                                                                                                                                 |                          |
| Protocol version                  | 3       | Date and version identifier                                                                                                                                                                                                                                                              | 2                        |
| Funding                           | 4       | Sources and types of financial, material, and other support                                                                                                                                                                                                                              | 20                       |
| Roles and responsibilities        | 5a      | Names, affiliations, and roles of protocol contributors                                                                                                                                                                                                                                  | 1                        |
|                                   | 5b      | Name and contact information for the trial sponsor                                                                                                                                                                                                                                       |                          |
|                                   | 5c      | Role of study sponsor and funders, if any, in study design; collection, management, analysis, and interpretation of data; writing of the report; and the decision to submit the report for publication, including whether they will have ultimate authority over any of these activities |                          |
|                                   | 5d      | Composition, roles, and responsibilities of the coordinating centre, steering committee, endpoint adjudication committee, data management team, and other individuals or groups overseeing the trial, if applicable (see Item 21a for data monitoring committee)                         |                          |

|    |                                                           |     |                                                                                                                                                                                                                                                                                                                                                                                |                              |  |  |  |
|----|-----------------------------------------------------------|-----|--------------------------------------------------------------------------------------------------------------------------------------------------------------------------------------------------------------------------------------------------------------------------------------------------------------------------------------------------------------------------------|------------------------------|--|--|--|
| 1  | <b>Introduction</b>                                       |     |                                                                                                                                                                                                                                                                                                                                                                                |                              |  |  |  |
| 2  |                                                           |     |                                                                                                                                                                                                                                                                                                                                                                                |                              |  |  |  |
| 3  | Background and rationale                                  | 6a  | Description of research question and justification for undertaking the trial, including summary of relevant studies (published and unpublished) examining benefits and harms for each intervention                                                                                                                                                                             | 4-6                          |  |  |  |
| 4  |                                                           |     |                                                                                                                                                                                                                                                                                                                                                                                |                              |  |  |  |
| 5  |                                                           |     |                                                                                                                                                                                                                                                                                                                                                                                |                              |  |  |  |
| 6  |                                                           | 6b  | Explanation for choice of comparators                                                                                                                                                                                                                                                                                                                                          | 4-6                          |  |  |  |
| 7  |                                                           |     |                                                                                                                                                                                                                                                                                                                                                                                |                              |  |  |  |
| 8  | Objectives                                                | 7   | Specific objectives or hypotheses                                                                                                                                                                                                                                                                                                                                              | 6-8                          |  |  |  |
| 9  |                                                           |     |                                                                                                                                                                                                                                                                                                                                                                                |                              |  |  |  |
| 10 | Trial design                                              | 8   | Description of trial design including type of trial (eg, parallel group, crossover, factorial, single group), allocation ratio, and framework (eg, superiority, equivalence, noninferiority, exploratory)                                                                                                                                                                      | 9                            |  |  |  |
| 11 |                                                           |     |                                                                                                                                                                                                                                                                                                                                                                                |                              |  |  |  |
| 12 |                                                           |     |                                                                                                                                                                                                                                                                                                                                                                                |                              |  |  |  |
| 13 |                                                           |     |                                                                                                                                                                                                                                                                                                                                                                                |                              |  |  |  |
| 14 | <b>Methods: Participants, interventions, and outcomes</b> |     |                                                                                                                                                                                                                                                                                                                                                                                |                              |  |  |  |
| 15 |                                                           |     |                                                                                                                                                                                                                                                                                                                                                                                |                              |  |  |  |
| 16 | Study setting                                             | 9   | Description of study settings (eg, community clinic, academic hospital) and list of countries where data will be collected. Reference to where list of study sites can be obtained                                                                                                                                                                                             | 9-10                         |  |  |  |
| 17 |                                                           |     |                                                                                                                                                                                                                                                                                                                                                                                |                              |  |  |  |
| 18 |                                                           |     |                                                                                                                                                                                                                                                                                                                                                                                |                              |  |  |  |
| 19 | Eligibility criteria                                      | 10  | Inclusion and exclusion criteria for participants. If applicable, eligibility criteria for study centres and individuals who will perform the interventions (eg, surgeons, psychotherapists)                                                                                                                                                                                   | 10                           |  |  |  |
| 20 |                                                           |     |                                                                                                                                                                                                                                                                                                                                                                                |                              |  |  |  |
| 21 |                                                           |     |                                                                                                                                                                                                                                                                                                                                                                                |                              |  |  |  |
| 22 | Interventions                                             | 11a | Interventions for each group with sufficient detail to allow replication, including how and when they will be administered                                                                                                                                                                                                                                                     | 11-12                        |  |  |  |
| 23 |                                                           |     |                                                                                                                                                                                                                                                                                                                                                                                |                              |  |  |  |
| 24 |                                                           |     |                                                                                                                                                                                                                                                                                                                                                                                |                              |  |  |  |
| 25 |                                                           |     |                                                                                                                                                                                                                                                                                                                                                                                |                              |  |  |  |
| 26 |                                                           | 11b | Criteria for discontinuing or modifying allocated interventions for a given trial participant (eg, drug dose change in response to harms, participant request, or improving/worsening disease)                                                                                                                                                                                 | 12                           |  |  |  |
| 27 |                                                           |     |                                                                                                                                                                                                                                                                                                                                                                                |                              |  |  |  |
| 28 |                                                           |     |                                                                                                                                                                                                                                                                                                                                                                                |                              |  |  |  |
| 29 |                                                           | 11c | Strategies to improve adherence to intervention protocols, and any procedures for monitoring adherence (eg, drug tablet return, laboratory tests)                                                                                                                                                                                                                              |                              |  |  |  |
| 30 |                                                           |     |                                                                                                                                                                                                                                                                                                                                                                                |                              |  |  |  |
| 31 |                                                           |     |                                                                                                                                                                                                                                                                                                                                                                                |                              |  |  |  |
| 32 |                                                           | 11d | Relevant concomitant care and interventions that are permitted or prohibited during the trial                                                                                                                                                                                                                                                                                  |                              |  |  |  |
| 33 |                                                           |     |                                                                                                                                                                                                                                                                                                                                                                                |                              |  |  |  |
| 34 | Outcomes                                                  | 12  | Primary, secondary, and other outcomes, including the specific measurement variable (eg, systolic blood pressure), analysis metric (eg, change from baseline, final value, time to event), method of aggregation (eg, median, proportion), and time point for each outcome. Explanation of the clinical relevance of chosen efficacy and harm outcomes is strongly recommended | 12-14                        |  |  |  |
| 35 |                                                           |     |                                                                                                                                                                                                                                                                                                                                                                                |                              |  |  |  |
| 36 |                                                           |     |                                                                                                                                                                                                                                                                                                                                                                                |                              |  |  |  |
| 37 |                                                           |     |                                                                                                                                                                                                                                                                                                                                                                                |                              |  |  |  |
| 38 |                                                           |     |                                                                                                                                                                                                                                                                                                                                                                                |                              |  |  |  |
| 39 |                                                           |     |                                                                                                                                                                                                                                                                                                                                                                                |                              |  |  |  |
| 40 | Participant timeline                                      | 13  | Time schedule of enrolment, interventions (including any run-ins and washouts), assessments, and visits for participants. A schematic diagram is highly recommended (see Figure)                                                                                                                                                                                               | 11-12,<br>Figure 1, Figure 2 |  |  |  |
| 41 |                                                           |     |                                                                                                                                                                                                                                                                                                                                                                                |                              |  |  |  |
| 42 |                                                           |     |                                                                                                                                                                                                                                                                                                                                                                                |                              |  |  |  |
| 43 |                                                           |     |                                                                                                                                                                                                                                                                                                                                                                                |                              |  |  |  |
| 44 |                                                           |     |                                                                                                                                                                                                                                                                                                                                                                                |                              |  |  |  |
| 45 |                                                           |     |                                                                                                                                                                                                                                                                                                                                                                                |                              |  |  |  |
| 46 |                                                           |     |                                                                                                                                                                                                                                                                                                                                                                                |                              |  |  |  |

|   |             |    |                                                                                                                                                                                       |                         |
|---|-------------|----|---------------------------------------------------------------------------------------------------------------------------------------------------------------------------------------|-------------------------|
| 1 | Sample size | 14 | Estimated number of participants needed to achieve study objectives and how it was determined, including clinical and statistical assumptions supporting any sample size calculations | Figure 1, 2, Appendix 4 |
| 2 |             |    |                                                                                                                                                                                       |                         |
| 3 |             |    |                                                                                                                                                                                       |                         |
| 4 | Recruitment | 15 | Strategies for achieving adequate participant enrolment to reach target sample size                                                                                                   | 13, Appendix 1          |
| 5 |             |    |                                                                                                                                                                                       |                         |

## 6 **Methods: Assignment of interventions (for controlled trials)**

### 7 Allocation:

|    |                                  |     |                                                                                                                                                                                                                                                                                                                                                          |    |
|----|----------------------------------|-----|----------------------------------------------------------------------------------------------------------------------------------------------------------------------------------------------------------------------------------------------------------------------------------------------------------------------------------------------------------|----|
| 8  |                                  |     |                                                                                                                                                                                                                                                                                                                                                          |    |
| 9  |                                  |     |                                                                                                                                                                                                                                                                                                                                                          |    |
| 10 | Sequence generation              | 16a | Method of generating the allocation sequence (eg, computer-generated random numbers), and list of any factors for stratification. To reduce predictability of a random sequence, details of any planned restriction (eg, blocking) should be provided in a separate document that is unavailable to those who enrol participants or assign interventions | 11 |
| 11 |                                  |     |                                                                                                                                                                                                                                                                                                                                                          |    |
| 12 |                                  |     |                                                                                                                                                                                                                                                                                                                                                          |    |
| 13 |                                  |     |                                                                                                                                                                                                                                                                                                                                                          |    |
| 14 |                                  |     |                                                                                                                                                                                                                                                                                                                                                          |    |
| 15 |                                  |     |                                                                                                                                                                                                                                                                                                                                                          |    |
| 16 | Allocation concealment mechanism | 16b | Mechanism of implementing the allocation sequence (eg, central telephone; sequentially numbered, opaque, sealed envelopes), describing any steps to conceal the sequence until interventions are assigned                                                                                                                                                |    |
| 17 |                                  |     |                                                                                                                                                                                                                                                                                                                                                          |    |
| 18 |                                  |     |                                                                                                                                                                                                                                                                                                                                                          |    |
| 19 |                                  |     |                                                                                                                                                                                                                                                                                                                                                          |    |
| 20 | Implementation                   | 16c | Who will generate the allocation sequence, who will enrol participants, and who will assign participants to interventions                                                                                                                                                                                                                                | 11 |
| 21 |                                  |     |                                                                                                                                                                                                                                                                                                                                                          |    |
| 22 |                                  |     |                                                                                                                                                                                                                                                                                                                                                          |    |
| 23 |                                  |     |                                                                                                                                                                                                                                                                                                                                                          |    |
| 24 | Blinding (masking)               | 17a | Who will be blinded after assignment to interventions (eg, trial participants, care providers, outcome assessors, data analysts), and how                                                                                                                                                                                                                | 11 |
| 25 |                                  |     |                                                                                                                                                                                                                                                                                                                                                          |    |
| 26 |                                  |     |                                                                                                                                                                                                                                                                                                                                                          |    |
| 27 |                                  | 17b | If blinded, circumstances under which unblinding is permissible, and procedure for revealing a participant's allocated intervention during the trial                                                                                                                                                                                                     |    |
| 28 |                                  |     |                                                                                                                                                                                                                                                                                                                                                          |    |
| 29 |                                  |     |                                                                                                                                                                                                                                                                                                                                                          |    |
| 30 |                                  |     |                                                                                                                                                                                                                                                                                                                                                          |    |

## 31 **Methods: Data collection, management, and analysis**

|    |                         |     |                                                                                                                                                                                                                                                                                                                                                                                                              |                |
|----|-------------------------|-----|--------------------------------------------------------------------------------------------------------------------------------------------------------------------------------------------------------------------------------------------------------------------------------------------------------------------------------------------------------------------------------------------------------------|----------------|
| 32 |                         |     |                                                                                                                                                                                                                                                                                                                                                                                                              |                |
| 33 | Data collection methods | 18a | Plans for assessment and collection of outcome, baseline, and other trial data, including any related processes to promote data quality (eg, duplicate measurements, training of assessors) and a description of study instruments (eg, questionnaires, laboratory tests) along with their reliability and validity, if known. Reference to where data collection forms can be found, if not in the protocol | 12, Appendix 1 |
| 34 |                         |     |                                                                                                                                                                                                                                                                                                                                                                                                              |                |
| 35 |                         |     |                                                                                                                                                                                                                                                                                                                                                                                                              |                |
| 36 |                         |     |                                                                                                                                                                                                                                                                                                                                                                                                              |                |
| 37 |                         |     |                                                                                                                                                                                                                                                                                                                                                                                                              |                |
| 38 |                         |     |                                                                                                                                                                                                                                                                                                                                                                                                              |                |
| 39 |                         | 18b | Plans to promote participant retention and complete follow-up, including list of any outcome data to be collected for participants who discontinue or deviate from intervention protocols                                                                                                                                                                                                                    |                |
| 40 |                         |     |                                                                                                                                                                                                                                                                                                                                                                                                              |                |
| 41 |                         |     |                                                                                                                                                                                                                                                                                                                                                                                                              |                |
| 42 |                         |     |                                                                                                                                                                                                                                                                                                                                                                                                              |                |

|    |                     |     |                                                                                                                                                                                                                                                                   |                |
|----|---------------------|-----|-------------------------------------------------------------------------------------------------------------------------------------------------------------------------------------------------------------------------------------------------------------------|----------------|
| 1  | Data management     | 19  | Plans for data entry, coding, security, and storage, including any related processes to promote data quality (eg, double data entry; range checks for data values). Reference to where details of data management procedures can be found, if not in the protocol | 19, Appendix 6 |
| 2  |                     |     |                                                                                                                                                                                                                                                                   |                |
| 3  |                     |     |                                                                                                                                                                                                                                                                   |                |
| 4  |                     |     |                                                                                                                                                                                                                                                                   |                |
| 5  | Statistical methods | 20a | Statistical methods for analysing primary and secondary outcomes. Reference to where other details of the statistical analysis plan can be found, if not in the protocol                                                                                          | 15, Appendix 4 |
| 6  |                     |     |                                                                                                                                                                                                                                                                   |                |
| 7  |                     |     |                                                                                                                                                                                                                                                                   |                |
| 8  |                     | 20b | Methods for any additional analyses (eg, subgroup and adjusted analyses)                                                                                                                                                                                          | 15-18          |
| 9  |                     |     |                                                                                                                                                                                                                                                                   |                |
| 10 |                     | 20c | Definition of analysis population relating to protocol non-adherence (eg, as randomised analysis), and any statistical methods to handle missing data (eg, multiple imputation)                                                                                   |                |
| 11 |                     |     |                                                                                                                                                                                                                                                                   |                |
| 12 |                     |     |                                                                                                                                                                                                                                                                   |                |
| 13 |                     |     |                                                                                                                                                                                                                                                                   |                |

14 **Methods: Monitoring**

|    |                 |     |                                                                                                                                                                                                                                                                                                                                       |            |
|----|-----------------|-----|---------------------------------------------------------------------------------------------------------------------------------------------------------------------------------------------------------------------------------------------------------------------------------------------------------------------------------------|------------|
| 15 |                 |     |                                                                                                                                                                                                                                                                                                                                       |            |
| 16 | Data monitoring | 21a | Composition of data monitoring committee (DMC); summary of its role and reporting structure; statement of whether it is independent from the sponsor and competing interests; and reference to where further details about its charter can be found, if not in the protocol. Alternatively, an explanation of why a DMC is not needed | 19         |
| 17 |                 |     |                                                                                                                                                                                                                                                                                                                                       |            |
| 18 |                 |     |                                                                                                                                                                                                                                                                                                                                       |            |
| 19 |                 |     |                                                                                                                                                                                                                                                                                                                                       |            |
| 20 |                 |     |                                                                                                                                                                                                                                                                                                                                       |            |
| 21 |                 |     |                                                                                                                                                                                                                                                                                                                                       |            |
| 22 |                 | 21b | Description of any interim analyses and stopping guidelines, including who will have access to these interim results and make the final decision to terminate the trial                                                                                                                                                               |            |
| 23 |                 |     |                                                                                                                                                                                                                                                                                                                                       |            |
| 24 |                 |     |                                                                                                                                                                                                                                                                                                                                       |            |
| 25 | Harms           | 22  | Plans for collecting, assessing, reporting, and managing solicited and spontaneously reported adverse events and other unintended effects of trial interventions or trial conduct                                                                                                                                                     | Appendix 2 |
| 26 |                 |     |                                                                                                                                                                                                                                                                                                                                       |            |
| 27 |                 |     |                                                                                                                                                                                                                                                                                                                                       |            |
| 28 | Auditing        | 23  | Frequency and procedures for auditing trial conduct, if any, and whether the process will be independent from investigators and the sponsor                                                                                                                                                                                           |            |
| 29 |                 |     |                                                                                                                                                                                                                                                                                                                                       |            |
| 30 |                 |     |                                                                                                                                                                                                                                                                                                                                       |            |
| 31 |                 |     |                                                                                                                                                                                                                                                                                                                                       |            |

32 **Ethics and dissemination**

|    |                          |    |                                                                                                                                                                                                                                  |    |
|----|--------------------------|----|----------------------------------------------------------------------------------------------------------------------------------------------------------------------------------------------------------------------------------|----|
| 33 |                          |    |                                                                                                                                                                                                                                  |    |
| 34 | Research ethics approval | 24 | Plans for seeking research ethics committee/institutional review board (REC/IRB) approval                                                                                                                                        | 19 |
| 35 |                          |    |                                                                                                                                                                                                                                  |    |
| 36 |                          |    |                                                                                                                                                                                                                                  |    |
| 37 | Protocol amendments      | 25 | Plans for communicating important protocol modifications (eg, changes to eligibility criteria, outcomes, analyses) to relevant parties (eg, investigators, REC/IRBs, trial participants, trial registries, journals, regulators) |    |
| 38 |                          |    |                                                                                                                                                                                                                                  |    |
| 39 |                          |    |                                                                                                                                                                                                                                  |    |
| 40 |                          |    |                                                                                                                                                                                                                                  |    |
| 41 |                          |    |                                                                                                                                                                                                                                  |    |
| 42 |                          |    |                                                                                                                                                                                                                                  |    |

|    |                               |     |                                                                                                                                                                                                                                                                                     |                |
|----|-------------------------------|-----|-------------------------------------------------------------------------------------------------------------------------------------------------------------------------------------------------------------------------------------------------------------------------------------|----------------|
| 1  | Consent or assent             | 26a | Who will obtain informed consent or assent from potential trial participants or authorised surrogates, and how (see Item 32)                                                                                                                                                        | Appendix 4     |
| 2  |                               |     |                                                                                                                                                                                                                                                                                     |                |
| 3  |                               |     |                                                                                                                                                                                                                                                                                     |                |
| 4  |                               | 26b | Additional consent provisions for collection and use of participant data and biological specimens in ancillary studies, if applicable                                                                                                                                               |                |
| 5  |                               |     |                                                                                                                                                                                                                                                                                     |                |
| 6  |                               |     |                                                                                                                                                                                                                                                                                     |                |
| 7  | Confidentiality               | 27  | How personal information about potential and enrolled participants will be collected, shared, and maintained in order to protect confidentiality before, during, and after the trial                                                                                                | 19             |
| 8  |                               |     |                                                                                                                                                                                                                                                                                     |                |
| 9  |                               |     |                                                                                                                                                                                                                                                                                     |                |
| 10 | Declaration of interests      | 28  | Financial and other competing interests for principal investigators for the overall trial and each study site                                                                                                                                                                       |                |
| 11 |                               |     |                                                                                                                                                                                                                                                                                     |                |
| 12 |                               |     |                                                                                                                                                                                                                                                                                     |                |
| 13 | Access to data                | 29  | Statement of who will have access to the final trial dataset, and disclosure of contractual agreements that limit such access for investigators                                                                                                                                     | 19             |
| 14 |                               |     |                                                                                                                                                                                                                                                                                     |                |
| 15 |                               |     |                                                                                                                                                                                                                                                                                     |                |
| 16 | Ancillary and post-trial care | 30  | Provisions, if any, for ancillary and post-trial care, and for compensation to those who suffer harm from trial participation                                                                                                                                                       |                |
| 17 |                               |     |                                                                                                                                                                                                                                                                                     |                |
| 18 |                               |     |                                                                                                                                                                                                                                                                                     |                |
| 19 |                               |     |                                                                                                                                                                                                                                                                                     |                |
| 20 | Dissemination policy          | 31a | Plans for investigators and sponsor to communicate trial results to participants, healthcare professionals, the public, and other relevant groups (eg, via publication, reporting in results databases, or other data sharing arrangements), including any publication restrictions | 19             |
| 21 |                               |     |                                                                                                                                                                                                                                                                                     |                |
| 22 |                               |     |                                                                                                                                                                                                                                                                                     |                |
| 23 |                               |     |                                                                                                                                                                                                                                                                                     |                |
| 24 |                               | 31b | Authorship eligibility guidelines and any intended use of professional writers                                                                                                                                                                                                      |                |
| 25 |                               |     |                                                                                                                                                                                                                                                                                     |                |
| 26 |                               | 31c | Plans, if any, for granting public access to the full protocol, participant-level dataset, and statistical code                                                                                                                                                                     |                |
| 27 |                               |     |                                                                                                                                                                                                                                                                                     |                |
| 28 |                               |     |                                                                                                                                                                                                                                                                                     |                |
| 29 | <b>Appendices</b>             |     |                                                                                                                                                                                                                                                                                     |                |
| 30 |                               |     |                                                                                                                                                                                                                                                                                     |                |
| 31 | Informed consent materials    | 32  | Model consent form and other related documentation given to participants and authorised surrogates                                                                                                                                                                                  | Appendix 2     |
| 32 |                               |     |                                                                                                                                                                                                                                                                                     |                |
| 33 |                               |     |                                                                                                                                                                                                                                                                                     |                |
| 34 | Biological specimens          | 33  | Plans for collection, laboratory evaluation, and storage of biological specimens for genetic or molecular analysis in the current trial and for future use in ancillary studies, if applicable                                                                                      | Not applicable |
| 35 |                               |     |                                                                                                                                                                                                                                                                                     |                |
| 36 |                               |     |                                                                                                                                                                                                                                                                                     |                |

\*It is strongly recommended that this checklist be read in conjunction with the SPIRIT 2013 Explanation & Elaboration for important clarification on the items. Amendments to the protocol should be tracked and dated. The SPIRIT checklist is copyrighted by the SPIRIT Group under the Creative Commons [“Attribution-NonCommercial-NoDerivs 3.0 Unported”](https://creativecommons.org/licenses/by-nc-nd/3.0/) license.
